# Supplementary material for: Functional drug–target–disease network analysis of gene–phenotype connectivity for curcumin in hepatocellular carcinoma
Source: PeerJ journal article supplement (doi:10.7717/peerj.12339), 2021-10-26
Supplement: Raw_data_materials.zip [file Raw_data_materials.zip]

## Sheet: TP53
Sample	Well	Fluor	Identifier		Threshold Cycle (Ct)	Ct Mean	Ct Std. Dev	Starting Quantity (SQ)	Log Starting Quantity	SQ Mean	SQ Std. Dev.	△Ct	△△Ct	2-△△Ct
	E01	SYBR	TP53		26.649			0	#NUM!	0	0	13.7843	0	1	0.931505
	E02	SYBR	TP53		26.789	26.7533	0.0918495	0	#NUM!	0	0	13.9243	0.14	0.907519
Hep3B+0 μM curcumin	E03	SYBR	TP53		26.822			0	#NUM!	0	0	13.9573	0.173	0.886996
19070662	E04	SYBR	β-Actin		12.814			0	#NUM!	0	0
	E05	SYBR	β-Actin		12.939	12.8647	0.0657749	0	#NUM!	0	0
	E06	SYBR	β-Actin		12.841			0	#NUM!	0	0
	D01	SYBR	TP53		26.715			0	#NUM!	0	0	13.8257	0.0413333	0.971756	0.952997
	D02	SYBR	TP53		26.775	26.7433	0.0301386	0	#NUM!	0	0	13.8857	0.101333	0.932171
Hep3B+20 μM curcumin	D03	SYBR	TP53		26.74			0	#NUM!	0	0	13.8507	0.0663333	0.955062
19070664	D04	SYBR	β-Actin		12.981			0	#NUM!	0	0
	D05	SYBR	β-Actin		12.863	12.8893	0.0817455	0	#NUM!	0	0
	D06	SYBR	β-Actin		12.824			0	#NUM!	0	0
		TP53
	β-Actin

## Sheet: RB1
Sample	Well	Fluor	Identifier		Threshold Cycle (Ct)	Ct Mean	Ct Std. Dev	Starting Quantity (SQ)	Log Starting Quantity	SQ Mean	SQ Std. Dev.	△Ct	△△Ct	2-△△Ct
	E01	SYBR	RB1		25.218			0	#NUM!	0	0	12.3533	0	1	1.02711
	E02	SYBR	RB1		25.161	25.1797	0.0332014	0	#NUM!	0	0	12.2963	-0.057	1.0403
Hep3B+0 μM curcumin	E03	SYBR	RB1		25.16			0	#NUM!	0	0	12.2953	-0.058	1.04102
19070662	E04	SYBR	β-Actin		12.814			0	#NUM!	0	0
	E05	SYBR	β-Actin		12.939	12.8647	0.0657749	0	#NUM!	0	0
	E06	SYBR	β-Actin		12.841			0	#NUM!	0	0
	D01	SYBR	RB1		25.259			0	#NUM!	0	0	12.3697	0.0163333	0.988742	0.999705
	D02	SYBR	RB1		25.309	25.2443	0.0731118	0	#NUM!	0	0	12.4197	0.0663333	0.955062
Hep3B+20 μM curcumin	D03	SYBR	RB1		25.165			0	#NUM!	0	0	12.2757	-0.0776667	1.05531
19070664	D04	SYBR	β-Actin		12.981			0	#NUM!	0	0
	D05	SYBR	β-Actin		12.863	12.8893	0.0817455	0	#NUM!	0	0
	D06	SYBR	β-Actin		12.824			0	#NUM!	0	0
		RB1

## Sheet: TGFB1
Sample	Well	Fluor	Identifier		Threshold Cycle (Ct)	Ct Mean	Ct Std. Dev	Starting Quantity (SQ)	Log Starting Quantity	SQ Mean	SQ Std. Dev.	△Ct	△△Ct	2-△△Ct
	E01	SYBR	TGFB1		19.646			0	#NUM!	0	0	6.78133	0	1	0.984701
	E02	SYBR	TGFB1		19.675	19.6683	0.0198578	0	#NUM!	0	0	6.81033	0.029	0.980099
Hep3B+0 μM curcumin	E03	SYBR	TGFB1		19.684			0	#NUM!	0	0	6.81933	0.038	0.974004
19070662	E04	SYBR	β-Actin		12.814			0	#NUM!	0	0
	E05	SYBR	β-Actin		12.939	12.8647	0.0657749	0	#NUM!	0	0
	E06	SYBR	β-Actin		12.841			0	#NUM!	0	0
	D01	SYBR	TGFB1		20.288			0	#NUM!	0	0	7.39867	0.617333	0.651875	0.613865
	D02	SYBR	TGFB1		20.386	20.3763	0.0838764	0	#NUM!	0	0	7.49667	0.715333	0.609064
Hep3B+20 μM curcumin	D03	SYBR	TGFB1		20.4549			0	#NUM!	0	0	7.56558	0.784243	0.580656
19070664	D04	SYBR	β-Actin		12.981			0	#NUM!	0	0
	D05	SYBR	β-Actin		12.863	12.8893	0.0817455	0	#NUM!	0	0
	D06	SYBR	β-Actin		12.824			0	#NUM!	0	0
		TGFB1

## Sheet: GSTP1
Sample	Well	Fluor	Identifier		Threshold Cycle (Ct)	Ct Mean	Ct Std. Dev	Starting Quantity (SQ)	Log Starting Quantity	SQ Mean	SQ Std. Dev.	△Ct	△△Ct	2-△△Ct
	E01	SYBR	GSTP1		29.138			0	#NUM!	0	0	16.2733	0	1	0.948676
	E02	SYBR	GSTP1		29.219	29.2153	0.0755667	0	#NUM!	0	0	16.3543	0.081	0.945402
Hep3B+0 μM curcumin	E03	SYBR	GSTP1		29.289			0	#NUM!	0	0	16.4243	0.151	0.900626
19070662	E04	SYBR	β-Actin		12.814			0	#NUM!	0	0
	E05	SYBR	β-Actin		12.939	12.8647	0.0657749	0	#NUM!	0	0
	E06	SYBR	β-Actin		12.841			0	#NUM!	0	0
	D01	SYBR	GSTP1		29.909			0	#NUM!	0	0	17.0197	0.746333	0.596117	0.652057
	D02	SYBR	GSTP1		29.6964	29.7825	0.111941	0	#NUM!	0	0	16.807	0.533698	0.690782
Hep3B+20 μM curcumin	D03	SYBR	GSTP1		29.742			0	#NUM!	0	0	16.8527	0.579333	0.669273
19070664	D04	SYBR	β-Actin		12.981			0	#NUM!	0	0
	D05	SYBR	β-Actin		12.863	12.8893	0.0817455	0	#NUM!	0	0
	D06	SYBR	β-Actin		12.824			0	#NUM!	0	0
		GSTP1

## Sheet: GSTM1
Sample	Well	Fluor	Identifier		Threshold Cycle (Ct)	Ct Mean	Ct Std. Dev	Starting Quantity (SQ)	Log Starting Quantity	SQ Mean	SQ Std. Dev.	△Ct	△△Ct	2-△△Ct
	E01	SYBR	GSTM1		22.839			0	#NUM!	0	0	9.97433	0	1	0.964038
	E02	SYBR	GSTM1		22.8925	22.8925	0.0535	0	#NUM!	0	0	10.0278	0.0535	0.963596
Hep3B+0 μM curcumin	E03	SYBR	GSTM1		22.946			0	#NUM!	0	0	10.0813	0.107	0.928517
19070662	E04	SYBR	β-Actin		12.814			0	#NUM!	0	0
	E05	SYBR	β-Actin		12.939	12.8647	0.0657749	0	#NUM!	0	0
	E06	SYBR	β-Actin		12.841			0	#NUM!	0	0
	D01	SYBR	GSTM1		22.928			0	#NUM!	0	0	10.0387	0.0643333	0.956387	0.970521
	D02	SYBR	GSTM1		22.916	22.907	0.0266646	0	#NUM!	0	0	10.0267	0.0523333	0.964375
Hep3B+20 μM curcumin	D03	SYBR	GSTM1		22.877			0	#NUM!	0	0	9.98767	0.0133333	0.990801
19070664	D04	SYBR	β-Actin		12.981			0	#NUM!	0	0
	D05	SYBR	β-Actin		12.863	12.8893	0.0817455	0	#NUM!	0	0
	D06	SYBR	β-Actin		12.824			0	#NUM!	0	0
		GSTM1
