# Supplementary material for: Functional drug–target–disease network analysis of gene–phenotype connectivity for curcumin in hepatocellular carcinoma
Source: PeerJ journal article supplement (doi:10.7717/peerj.12339), 2021-10-26
Supplement: Supplemental_Table_S1-5.zip [file Supplemental_Table_S1-5.zip]

## Sheet: Sheet1
Gene Symbol	Gene ID	Disease Name	Disease ID	Direct Evidence	Inference Network	Inference Score	Reference Count
CCND1	595	Carcinoma, Hepatocellular	MESH:D006528	marker/mechanism	1,4-bis(2-(3,5-dichloropyridyloxy))benzene|1-nitropyrene|2-((((2-chloroethyl)nitrosoamino)carbonyl)amino)propanamide|2,4-dinitrotoluene|2,6-dinitrotoluene|2-Acetylaminofluorene|2-amino-3,8-dimethylimidazo(4,5-f)quinoxaline|2-amino-8-(4-(2-hydroxyethoxy)cyclohexyl)-6-(6-methoxypyridin-3-yl)-4-methylpyrido(2,3-d)pyrimidin-7(8H)-one|(2E,4E,6E,10E)-3,7,11,15-tetramethyl-2,4,6,10,14-hexadecapentaenoic…	222.96	355
CASP8	841	Carcinoma, Hepatocellular	MESH:D006528	marker/mechanism	1-(3',4',5'-trimethoxyphenyl)-3-(3'',4''-dimethoxy-2'-hydroxyphenyl)propane|1-nitropyrene|2-(2-hydroxyethylsulfanyl)-3-methyl-1,4-naphthoquinone|2,4-dinitrotoluene|2,6-dinitrotoluene|2-amino-3,8-dimethylimidazo(4,5-f)quinoxaline|2-Methoxyestradiol|Acetaminophen|Acetylcysteine|Acrylamide|Aflatoxin B1|alpha-naphthoflavone|Arsenic|Arsenic Trioxide|Ascorbic Acid|Azacitidine|AZD 6244|Benzo(a)pyrene|be…	180.17	346
JUN	3725	Carcinoma, Hepatocellular	MESH:D006528	marker/mechanism	1,4-bis(2-(3,5-dichloropyridyloxy))benzene|1-nitropyrene|2,4-dinitrotoluene|2,6-dinitrotoluene|2-Acetylaminofluorene|2-amino-3,8-dimethylimidazo(4,5-f)quinoxaline|2-amino-3-methylimidazo(4,5-f)quinoline|3,7,11,15-tetramethyl-2,4,6,10,14-hexadecapentaenoic acid|Acetaminophen|Acetylcysteine|Acrylamide|Aflatoxin B1|alpha-naphthoflavone|antroquinonol|Arsenic|Arsenic Trioxide|Azathioprine|benz(a)anthr…	173.49	351
NFE2L2	4780	Carcinoma, Hepatocellular	MESH:D006528	marker/mechanism	1,4-bis(2-(3,5-dichloropyridyloxy))benzene|1,5-naphthalenediamine|1-nitropyrene|2,2-bis(bromomethyl)-1,3-propanediol|2,4-dinitrotoluene|2,6-dinitrotoluene|2-Acetylaminofluorene|2-amino-3,8-dimethylimidazo(4,5-f)quinoxaline|2-cyano-3,12-dioxooleana-1,9(11)-dien-28-oic acid ethyl amide|4,4'-diaminodiphenylmethane|Acetaminophen|Acetylcysteine|Acrylamide|Aflatoxin B1|alpha-naphthoflavone|aroclor 1260…	170.89	321
CCNB1	891	Carcinoma, Hepatocellular	MESH:D006528	marker/mechanism	1,4-bis(2-(3,5-dichloropyridyloxy))benzene|2-Acetylaminofluorene|2-amino-3,8-dimethylimidazo(4,5-f)quinoxaline|2-Methoxyestradiol|Acetaminophen|Acetylcysteine|Acrylamide|Aflatoxin B1|alpha-naphthoflavone|Arsenic|Arsenic Trioxide|Ascorbic Acid|Azacitidine|Azathioprine|AZD 6244|Benzo(a)pyrene|benzo(b)fluoranthene|Bezafibrate|Bortezomib|Butylated Hydroxyanisole|Butylated Hydroxytoluene|Carbon Tetrac…	168.29	318
MYC	4609	Carcinoma, Hepatocellular	MESH:D006528	marker/mechanism	1,4-bis(2-(3,5-dichloropyridyloxy))benzene|1-nitropyrene|2,4-dinitrotoluene|2-Acetylaminofluorene|2-nitrotoluene|4,4'-diaminodiphenylmethane|Acetaminophen|Acetylcysteine|Aflatoxin B1|alpha-hexachlorocyclohexane|alpha-naphthoflavone|Arsenic Trioxide|Ascorbic Acid|Azacitidine|AZD 6244|Benzo(a)pyrene|beta Carotene|Bleomycin|Bortezomib|Budesonide|cadmium telluride|Carbon Tetrachloride|Choline|cinnami…	165.87	330
TNF	7124	Carcinoma, Hepatocellular	MESH:D006528	marker/mechanism	1,4-bis(2-(3,5-dichloropyridyloxy))benzene|1-nitropyrene|2-Acetylaminofluorene|2-amino-3,8-dimethylimidazo(4,5-f)quinoxaline|2'-benzoyloxycinnamaldehyde|2-cyano-3,12-dioxooleana-1,9(11)-dien-28-oic acid ethyl amide|3,7,11,15-tetramethyl-2,4,6,10,14-hexadecapentaenoic acid|Acetaminophen|Acetylcysteine|Acrylamide|Active Hexose Correlated Compound|Aflatoxin B1|alpha-naphthoflavone|Androgens|aroclor …	158.1	369
MKI67	4288	Carcinoma, Hepatocellular	MESH:D006528	marker/mechanism	1,4-bis(2-(3,5-dichloropyridyloxy))benzene|2-Acetylaminofluorene|2-amino-3,8-dimethylimidazo(4,5-f)quinoxaline|4,4'-diaminodiphenylmethane|Acetaminophen|Acrylamide|Aflatoxin B1|Arsenic Trioxide|Ascorbic Acid|Azacitidine|Azathioprine|benz(a)anthracene|Benzo(a)pyrene|benzo(b)fluoranthene|beta Carotene|Bortezomib|Butylated Hydroxyanisole|Carbon Tetrachloride|Choline|Cisplatin|Contraceptives, Oral|Co…	157.27	297
CYP1A1	1543	Carcinoma, Hepatocellular	MESH:D006528	marker/mechanism	1,4-bis(2-(3,5-dichloropyridyloxy))benzene|1-nitropyrene|2,6-dinitrotoluene|2-Acetylaminofluorene|2-amino-3,4-dimethylimidazo(4,5-f)quinoline|2-amino-3,8-dimethylimidazo(4,5-f)quinoxaline|2-amino-3-methyl-9H-pyrido(2,3-b)indole|2-amino-3-methylimidazo(4,5-f)quinoline|2-amino-6-methyldipyrido(1,2-a-3',2'-d)imidazole|2-amino-9H-pyrido(2,3-b)indole|2-aminofluorene|2-aminophenol|2-Methoxyestradiol|3-…	156.77	336
TGFB1	7040	Carcinoma, Hepatocellular	MESH:D006528	marker/mechanism	2-Acetylaminofluorene|2-cyano-3,12-dioxooleana-1,9(11)-dien-28-oic acid ethyl amide|2-Methoxyestradiol|Acetaminophen|Acetylcysteine|Acrylamide|alpha-naphthoflavone|Androgens|Arsenic|Arsenic Trioxide|Ascorbic Acid|Azacitidine|Azathioprine|benz(a)anthracene|Benzo(a)pyrene|Bezafibrate|Biological Products|Bleomycin|Butylated Hydroxytoluene|Carbon Tetrachloride|chloroquine diphosphate|Cholesterol|Chol…	152.9	331
CYP1A2	1544	Carcinoma, Hepatocellular	MESH:D006528	marker/mechanism	1,4-bis(2-(3,5-dichloropyridyloxy))benzene|1-nitropyrene|2-Acetylaminofluorene|2-amino-3,4-dimethylimidazo(4,5-f)quinoline|2-amino-3,8-dimethylimidazo(4,5-f)quinoxaline|2-amino-3-methyl-9H-pyrido(2,3-b)indole|2-amino-3-methylimidazo(4,5-f)quinoline|2-amino-6-methyldipyrido(1,2-a-3',2'-d)imidazole|2-amino-9H-pyrido(2,3-b)indole|2-aminofluorene|3-amino-1,4-dimethyl-5H-pyrido(4,3-b)indole|3-amino-1-…	152.24	315
IL6	3569	Carcinoma, Hepatocellular	MESH:D006528	marker/mechanism	1,4-bis(2-(3,5-dichloropyridyloxy))benzene|1-nitropyrene|2-Acetylaminofluorene|2-cyano-3,12-dioxooleana-1,9(11)-dien-28-oic acid ethyl amide|3,7,11,15-tetramethyl-2,4,6,10,14-hexadecapentaenoic acid|Acetaminophen|Acetylcysteine|Acrylamide|Active Hexose Correlated Compound|Aflatoxin B1|alpha-naphthoflavone|Androgens|aroclor 1260|Arsenic|Arsenic Trioxide|Ascorbic Acid|Azacitidine|Azathioprine|AZD 6…	148.87	339
RB1	5925	Carcinoma, Hepatocellular	MESH:D006528	marker/mechanism	1,4-bis(2-(3,5-dichloropyridyloxy))benzene|2,4-dinitrotoluene|2-Acetylaminofluorene|3,7,11,15-tetramethyl-2,4,6,10,14-hexadecapentaenoic acid|Acetaminophen|Acetylcysteine|Acrylamide|Aflatoxin B1|alpha-hexachlorocyclohexane|alpha-naphthoflavone|Arsenic Trioxide|Benzo(a)pyrene|Bortezomib|Carbon Tetrachloride|Cisplatin|Colchicine|Copper|Curcumin|Daunorubicin|DDT|Decitabine|deguelin|Dexamethasone|Die…	146.99	307
MMP2	4313	Carcinoma, Hepatocellular	MESH:D006528	marker/mechanism	2,6-dinitrotoluene|2-Acetylaminofluorene|2-aminofluorene|2-cyano-3,12-dioxooleana-1,9(11)-dien-28-oic acid ethyl amide|4,4'-diaminodiphenylmethane|Acetaminophen|Acetylcysteine|Acrylamide|Aflatoxin B1|alpha-naphthoflavone|Androgens|Arsenic|Arsenic Trioxide|Ascorbic Acid|benz(a)anthracene|Benzo(a)pyrene|Bleomycin|brucine|Carbon Tetrachloride|carfilzomib|Choline|cinnamic aldehyde|Cisplatin|Copper|Cu…	145.03	310
EGFR	1956	Carcinoma, Hepatocellular	MESH:D006528	marker/mechanism	1,4-bis(2-(3,5-dichloropyridyloxy))benzene|2-Acetylaminofluorene|2'-benzoyloxycinnamaldehyde|2-nitrotoluene|4,4'-diaminodiphenylmethane|Acetaminophen|Acetylcysteine|Acrylamide|alpha-naphthoflavone|Arsenic|Arsenic Trioxide|Ascorbic Acid|benz(a)anthracene|Benzo(a)pyrene|benzo(b)fluoranthene|Biological Products|Butylated Hydroxyanisole|Carbon Tetrachloride|Cholesterol|Cimetidine|ciprofibrate|Cisplat…	144.93	312
CTNNB1	1499	Carcinoma, Hepatocellular	MESH:D006528	marker/mechanism	1,4-bis(2-(3,5-dichloropyridyloxy))benzene|2,6-dinitrotoluene|2-amino-3,4-dimethylimidazo(4,5-f)quinoline|2-amino-3-methylimidazo(4,5-f)quinoline|(2E,4E,6E,10E)-3,7,11,15-tetramethyl-2,4,6,10,14-hexadecapentaenoic acid|2-Methoxyestradiol|2-nitrotoluene|4,4'-diaminodiphenylmethane|Acetaminophen|Acetylcysteine|Acrylamide|Arsenic|Arsenic Trioxide|Ascorbic Acid|Benzo(a)pyrene|Bortezomib|Butylated Hyd…	144.07	301
CCNE1	898	Carcinoma, Hepatocellular	MESH:D006528	marker/mechanism	1,4-bis(2-(3,5-dichloropyridyloxy))benzene|2,6-dinitrotoluene|2-Acetylaminofluorene|2-amino-3,8-dimethylimidazo(4,5-f)quinoxaline|Acetaminophen|Acetylcysteine|Acrylamide|Aflatoxin B1|antroquinonol|Arsenic|Arsenic Trioxide|Benzo(a)pyrene|Budesonide|Butylated Hydroxyanisole|Butylated Hydroxytoluene|Carbon Tetrachloride|Choline|Cisplatin|Copper|Curcumin|Daunorubicin|Decitabine|deguelin|Dexamethasone…	143.47	305
PCK1	5105	Carcinoma, Hepatocellular	MESH:D006528	marker/mechanism	1,4-bis(2-(3,5-dichloropyridyloxy))benzene|2,4-dinitrotoluene|2,6-dinitrotoluene|2-Acetylaminofluorene|Acetaminophen|Acetylcysteine|Aflatoxin B1|aroclor 1260|Arsenic|Arsenic Trioxide|Azathioprine|Benzo(a)pyrene|Bezafibrate|Carbon Tetrachloride|Chlorodiphenyl (54% Chlorine)|Choline|cinnamic aldehyde|Clofibrate|Copper|Curcumin|DDT|Dexamethasone|Dichloroacetic Acid|dicyclanil|Diethylhexyl Phthalate|…	143.39	268
GSTM1	2944	Carcinoma, Hepatocellular	MESH:D006528	marker/mechanism	1,4-bis(2-(3,5-dichloropyridyloxy))benzene|1,5-naphthalenediamine|2,4-dinitrotoluene|2,6-dinitrotoluene|2-Acetylaminofluorene|2-amino-3,8-dimethylimidazo(4,5-f)quinoxaline|4,4'-diaminodiphenylmethane|Acetaminophen|Acetylcysteine|Acrylamide|Aflatoxin B1|Aflatoxins|Arsenic|Arsenic Trioxide|Ascorbic Acid|Azathioprine|Benzo(a)pyrene|benzo(b)fluoranthene|beta-hexachlorocyclohexane|Bleomycin|Butylated …	141.93	303
CDK1	983	Carcinoma, Hepatocellular	MESH:D006528	marker/mechanism	1,4-bis(2-(3,5-dichloropyridyloxy))benzene|2-((((2-chloroethyl)nitrosoamino)carbonyl)amino)propanamide|2,4-dinitrotoluene|2-Acetylaminofluorene|2-amino-3,8-dimethylimidazo(4,5-f)quinoxaline|2-Methoxyestradiol|4,4'-diaminodiphenylmethane|Acetaminophen|Acetylcysteine|Acrylamide|Aflatoxin B1|alpha-naphthoflavone|Arsenic|Arsenic Trioxide|Ascorbic Acid|Azacitidine|Azathioprine|Benzo(a)pyrene|benzo(b)f…	140.7	306
CDKN1B	1027	Carcinoma, Hepatocellular	MESH:D006528	marker/mechanism	1,4-bis(2-(3,5-dichloropyridyloxy))benzene|2-Acetylaminofluorene|2-amino-8-(4-(2-hydroxyethoxy)cyclohexyl)-6-(6-methoxypyridin-3-yl)-4-methylpyrido(2,3-d)pyrimidin-7(8H)-one|2-Methoxyestradiol|Acetaminophen|Acetylcysteine|Acrylamide|Aflatoxin B1|alpha-naphthoflavone|Arsenic|Arsenic Trioxide|Ascorbic Acid|Benzo(a)pyrene|beta-hexachlorocyclohexane|Bortezomib|Budesonide|Carbon Tetrachloride|Choline|…	140.62	303
VCAM1	7412	Carcinoma, Hepatocellular	MESH:D006528	marker/mechanism	2-Acetylaminofluorene|4,4'-diaminodiphenylmethane|Acetaminophen|Acetylcysteine|Aflatoxin B1|Arsenic|Arsenic Trioxide|Ascorbic Acid|Benzo(a)pyrene|Bezafibrate|Budesonide|Carbon Tetrachloride|Cholesterol|Choline|cinnamic aldehyde|Cisplatin|Clofibrate|Colchicine|Copper|Curcumin|Cyclophosphamide|Daunorubicin|Dexamethasone|Diethylnitrosamine|Diethylstilbestrol|Doxorubicin|Drugs, Chinese Herbal|epigall…	139.06	298
EGR1	1958	Carcinoma, Hepatocellular	MESH:D006528	marker/mechanism	1-nitropyrene|2,4-dinitrotoluene|2,6-dinitrotoluene|2-Acetylaminofluorene|2-amino-3,8-dimethylimidazo(4,5-f)quinoxaline|4,4'-diaminodiphenylmethane|Acetaminophen|Acetylcysteine|Acrylamide|Aflatoxin B1|Arsenic|Arsenic Trioxide|Azathioprine|Benzo(a)pyrene|benzo(b)fluoranthene|Bleomycin|Bortezomib|Carbon Tetrachloride|Choline|cinnamic aldehyde|Cisplatin|Clofibrate|Copper|Curcumin|Cyclophosphamide|DD…	138.3	313
CDK4	1019	Carcinoma, Hepatocellular	MESH:D006528	marker/mechanism	1,4-bis(2-(3,5-dichloropyridyloxy))benzene|2,4-dinitrotoluene|2-Acetylaminofluorene|2-Methoxyestradiol|Acetaminophen|Acetylcysteine|Acrylamide|Aflatoxin B1|antroquinonol|Arsenic|Arsenic Trioxide|Ascorbic Acid|Azacitidine|AZD 6244|Benzo(a)pyrene|Bezafibrate|Carbon Tetrachloride|Cisplatin|Clofibrate|Curcumin|DDT|deguelin|Dexamethasone|Diethylhexyl Phthalate|Diethylnitrosamine|Diethylstilbestrol|Dim…	137.9	278
IGF1	3479	Carcinoma, Hepatocellular	MESH:D006528	marker/mechanism	1,4-bis(2-(3,5-dichloropyridyloxy))benzene|2,4-dinitrotoluene|2-nitrotoluene|Acetaminophen|Acetylcysteine|Acrylamide|Aflatoxin B1|aroclor 1260|Arsenic|Arsenic Trioxide|Ascorbic Acid|Azathioprine|Benzbromarone|Benzo(a)pyrene|benzo(b)fluoranthene|Bezafibrate|Carbon Tetrachloride|Cholesterol|Clofibrate|Copper|Curcumin|cyproconazole|Cyproterone Acetate|Daunorubicin|DDT|deguelin|Dexamethasone|Diethylh…	137.22	310
EPHX1	2052	Carcinoma, Hepatocellular	MESH:D006528	marker/mechanism	1,4-bis(2-(3,5-dichloropyridyloxy))benzene|1,5-naphthalenediamine|2,2-bis(bromomethyl)-1,3-propanediol|2,4-dinitrotoluene|2,6-dinitrotoluene|2-Acetylaminofluorene|Acetaminophen|Acrylamide|Aflatoxin B1|Aflatoxins|alpha-hexachlorocyclohexane|Arsenic Trioxide|Ascorbic Acid|Azathioprine|benz(a)anthracene|Benzo(a)pyrene|benzo(b)fluoranthene|Butylated Hydroxyanisole|Carbon Tetrachloride|Chlorodiphenyl …	136.89	294
HSPB1	3315	Carcinoma, Hepatocellular	MESH:D006528	marker/mechanism	1,4-bis(2-(3,5-dichloropyridyloxy))benzene|2,4-dinitrotoluene|Acetaminophen|Acetylcysteine|Acrylamide|Active Hexose Correlated Compound|Aflatoxin B1|alpha-hexachlorocyclohexane|Arsenic Trioxide|Ascorbic Acid|Benzo(a)pyrene|Bleomycin|Bortezomib|Carbon Tetrachloride|Cisplatin|Clofibrate|Copper|Curcumin|Cyclophosphamide|Decitabine|Dexamethasone|Dichloroacetic Acid|Diethylhexyl Phthalate|Diethylnitro…	136.29	301
PTGS2	5743	Carcinoma, Hepatocellular	MESH:D006528	marker/mechanism	1,4-bis(2-(3,5-dichloropyridyloxy))benzene|2,6-dinitrotoluene|2-Acetylaminofluorene|2-amino-3,8-dimethylimidazo(4,5-f)quinoxaline|2-amino-3-methylimidazo(4,5-f)quinoline|3-(4-methylsulfonylphenyl)-4-phenyl-5-trifluoromethylisoxazole|Acetaminophen|Acetylcysteine|Acrylamide|Aflatoxin B1|alpha-naphthoflavone|Arsenic|Arsenic Trioxide|Ascorbic Acid|Azathioprine|benz(a)anthracene|Benzo(a)pyrene|benzo(b…	136.21	336
SOD2	6648	Carcinoma, Hepatocellular	MESH:D006528	marker/mechanism	2-Acetylaminofluorene|2-Methoxyestradiol|Acetaminophen|Acetylcysteine|Acrylamide|Aflatoxin B1|alpha-naphthoflavone|Arsenic|Arsenic Trioxide|Ascorbic Acid|Azathioprine|Benzbromarone|Benzo(a)pyrene|beta Carotene|Bleomycin|Bortezomib|Butylated Hydroxyanisole|Butylated Hydroxytoluene|Carbon Tetrachloride|chloroquine diphosphate|Choline|cinnamic aldehyde|ciprofibrate|Cisplatin|Clofibrate|Copper|Curcum…	133.94	325
TRP53	22059	Carcinoma, Hepatocellular	MESH:D006528	marker/mechanism	1,4-bis(2-(3,5-dichloropyridyloxy))benzene|1-nitropyrene|2-Acetylaminofluorene|2-amino-3,4-dimethylimidazo(4,5-f)quinoline|2-nitrotoluene|Acetaminophen|Acetylcysteine|Acrylamide|Aflatoxin B1|alpha-hexachlorocyclohexane|alpha-naphthoflavone|Arsenic|Arsenic Trioxide|Ascorbic Acid|benz(a)anthracene|Benzo(a)pyrene|benzo(b)fluoranthene|Bleomycin|Bortezomib|Butylated Hydroxyanisole|Carbon Tetrachloride…	133.85	290
TOP2A	7153	Carcinoma, Hepatocellular	MESH:D006528	marker/mechanism	1,4-bis(2-(3,5-dichloropyridyloxy))benzene|2-Acetylaminofluorene|2-amino-3,8-dimethylimidazo(4,5-f)quinoxaline|Acetaminophen|Acetylcysteine|Acrylamide|Aflatoxin B1|Arsenic|Arsenic Trioxide|Ascorbic Acid|Azacitidine|Azathioprine|Benzo(a)pyrene|benzo(b)fluoranthene|Carbon Tetrachloride|Cisplatin|Copper|Curcumin|Cyclophosphamide|Daunorubicin|Decitabine|Dexamethasone|Dichloroacetic Acid|Diethylnitros…	132.86	297
SREBF1	6720	Carcinoma, Hepatocellular	MESH:D006528	marker/mechanism	1,4-bis(2-(3,5-dichloropyridyloxy))benzene|2,4-dinitrotoluene|2,6-dinitrotoluene|4,4'-diaminodiphenylmethane|Acetaminophen|Acrylamide|Aflatoxin B1|aroclor 1260|Arsenic|Arsenic Trioxide|Ascorbic Acid|Benzo(a)pyrene|beta Carotene|beta-hexachlorocyclohexane|Bezafibrate|Carbon Tetrachloride|Cholesterol|Choline|cinnamic aldehyde|Cisplatin|Clofibrate|Copper|Curcumin|Decitabine|Dexamethasone|Dichloroace…	131.7	286
FOS	2353	Carcinoma, Hepatocellular	MESH:D006528	marker/mechanism	1,4-bis(2-(3,5-dichloropyridyloxy))benzene|1-nitropyrene|2,4-dinitrotoluene|2,6-dinitrotoluene|2-Acetylaminofluorene|2-amino-3,8-dimethylimidazo(4,5-f)quinoxaline|2-nitrotoluene|3,7,11,15-tetramethyl-2,4,6,10,14-hexadecapentaenoic acid|4,4'-diaminodiphenylmethane|Acetaminophen|Acetylcysteine|Acrylamide|Aflatoxin B1|alpha-hexachlorocyclohexane|alpha-naphthoflavone|Arsenic|Arsenic Trioxide|Ascorbic…	131.01	316
GDF15	9518	Carcinoma, Hepatocellular	MESH:D006528	marker/mechanism	1,4-bis(2-(3,5-dichloropyridyloxy))benzene|2,4-dinitrotoluene|2-Acetylaminofluorene|Acetaminophen|Acrylamide|Aflatoxin B1|Arsenic|Arsenic Trioxide|Azathioprine|benz(a)anthracene|Benzo(a)pyrene|benzo(b)fluoranthene|Bortezomib|Cisplatin|Clodronic Acid|Clofibrate|Colchicine|Copper|Daunorubicin|Decitabine|Dexamethasone|Dichloroacetic Acid|Diethylhexyl Phthalate|Diethylnitrosamine|Diethylstilbestrol|D…	130.29	294
CYP2E1	1571	Carcinoma, Hepatocellular	MESH:D006528	marker/mechanism	1,4-bis(2-(3,5-dichloropyridyloxy))benzene|2-Acetylaminofluorene|Acetaminophen|Acetylcysteine|Acrylamide|Aflatoxin B1|alpha-hexachlorocyclohexane|Androgens|Arsenic|Arsenic Trioxide|Ascorbic Acid|benz(a)anthracene|Benzo(a)pyrene|benzo(b)fluoranthene|brucine|Carbon Tetrachloride|Chlorodiphenyl (54% Chlorine)|Cholesterol|Choline|Cimetidine|ciprofibrate|Cisplatin|Clofibrate|Copper|Curcumin|Cyclophosp…	127.14	313
CEBPB	1051	Carcinoma, Hepatocellular	MESH:D006528	marker/mechanism	1,4-bis(2-(3,5-dichloropyridyloxy))benzene|1-nitropyrene|2-Acetylaminofluorene|2-amino-3,8-dimethylimidazo(4,5-f)quinoxaline|Acetaminophen|Acetylcysteine|Acrylamide|Arsenic|Arsenic Trioxide|Ascorbic Acid|Benzo(a)pyrene|Bleomycin|Bortezomib|Butylated Hydroxyanisole|Carbon Tetrachloride|Choline|Cisplatin|Clofibrate|Copper|Curcumin|Cyclophosphamide|Decitabine|Dexamethasone|Diethylhexyl Phthalate|Die…	125.91	189
RRM2	6241	Carcinoma, Hepatocellular	MESH:D006528	marker/mechanism	1,4-bis(2-(3,5-dichloropyridyloxy))benzene|2-amino-3,8-dimethylimidazo(4,5-f)quinoxaline|4,4'-diaminodiphenylmethane|Acetaminophen|Acrylamide|Aflatoxin B1|Arsenic Trioxide|Azacitidine|Azathioprine|benz(a)anthracene|Benzo(a)pyrene|benzo(b)fluoranthene|Carbon Tetrachloride|Cisplatin|Copper|Cyclophosphamide|cyproconazole|Dexamethasone|Diethylnitrosamine|Doxorubicin|Drugs, Chinese Herbal|Estradiol|Es…	125.44	273
PTEN	5728	Carcinoma, Hepatocellular	MESH:D006528	marker/mechanism	1,4-bis(2-(3,5-dichloropyridyloxy))benzene|2-Acetylaminofluorene|2-amino-8-(4-(2-hydroxyethoxy)cyclohexyl)-6-(6-methoxypyridin-3-yl)-4-methylpyrido(2,3-d)pyrimidin-7(8H)-one|Acetylcysteine|Acrylamide|Aflatoxin B1|Anti-Bacterial Agents|Arsenic|Arsenic Trioxide|Azacitidine|Benzo(a)pyrene|Bleomycin|Carbon Tetrachloride|Choline|Cisplatin|Clodronic Acid|Copper|Curcumin|Daunorubicin|Decitabine|Dexameth…	124.52	286
MMP9	4318	Carcinoma, Hepatocellular	MESH:D006528	marker/mechanism	2-Acetylaminofluorene|2-aminofluorene|Acetaminophen|Acetylcysteine|Acrylamide|Aflatoxin B1|alpha-naphthoflavone|Androgens|antroquinonol|Arsenic|Arsenic Trioxide|Ascorbic Acid|Azacitidine|Benzo(a)pyrene|beta-hexachlorocyclohexane|Bleomycin|Bortezomib|Budesonide|Carbon Tetrachloride|Choline|Cisplatin|Clofibrate|Curcumin|Decitabine|deguelin|Dexamethasone|Diethylhexyl Phthalate|Diethylnitrosamine|Dim…	124.51	298
EGF	1950	Carcinoma, Hepatocellular	MESH:D006528	marker/mechanism	2,4-dinitrotoluene|2,6-dinitrotoluene|2-Acetylaminofluorene|4,4'-diaminodiphenylmethane|Acetaminophen|Acetylcysteine|Aflatoxin B1|alpha-hexachlorocyclohexane|Arsenic Trioxide|benz(a)anthracene|Benzo(a)pyrene|Carbon Tetrachloride|Cimetidine|Cisplatin|Clofibrate|Copper|Curcumin|Cyproterone Acetate|Daunorubicin|DDT|Dexamethasone|Diethylhexyl Phthalate|Diethylnitrosamine|Diethylstilbestrol|Dimethylni…	124.39	290
HSPA5	3309	Carcinoma, Hepatocellular	MESH:D006528	marker/mechanism	1-nitropyrene|2,4-dinitrotoluene|Acetaminophen|Acetylcysteine|Aflatoxin B1|Arsenic|Arsenic Trioxide|Ascorbic Acid|Benzo(a)pyrene|Bleomycin|Bortezomib|Carbon Tetrachloride|Chlorodiphenyl (54% Chlorine)|Cholesterol|Choline|Cimetidine|Cisplatin|Clofibrate|Colchicine|Copper|Curcumin|Cyclophosphamide|DDT|Diethylhexyl Phthalate|Diethylnitrosamine|Doxorubicin|Drugs, Chinese Herbal|Estradiol|Ethanol|Ethi…	124.02	317
SLC2A2	6514	Carcinoma, Hepatocellular	MESH:D006528	marker/mechanism	1,4-bis(2-(3,5-dichloropyridyloxy))benzene|2,4-dinitrotoluene|2,6-dinitrotoluene|Acetaminophen|Acetylcysteine|Acrylamide|Aflatoxin B1|Arsenic Trioxide|Azathioprine|Benzo(a)pyrene|Bezafibrate|Carbon Tetrachloride|Cholesterol|Choline|Cisplatin|Curcumin|Cyclophosphamide|Dexamethasone|Diethylhexyl Phthalate|Diethylnitrosamine|Diethylstilbestrol|Estradiol|Ethanol|Ethinyl Estradiol|Flavonoids|Fluoroura…	123.32	270
AFP	174	Carcinoma, Hepatocellular	MESH:D006528	marker/mechanism	1,4-bis(2-(3,5-dichloropyridyloxy))benzene|2,4-dinitrotoluene|2-Acetylaminofluorene|4,4'-diaminodiphenylmethane|Acetaminophen|Aflatoxin B1|Arsenic Trioxide|Azacitidine|Benzo(a)pyrene|brucine|Carbon Tetrachloride|carfilzomib|chloroquine diphosphate|Choline|Clofibrate|Copper|Cyclophosphamide|Diethylhexyl Phthalate|Diethylnitrosamine|Diethylstilbestrol|diethylstilbestrol monophosphate|Dimethylnitros…	123.12	285
CEBPA	1050	Carcinoma, Hepatocellular	MESH:D006528	marker/mechanism	1,4-bis(2-(3,5-dichloropyridyloxy))benzene|1-nitropyrene|2-Acetylaminofluorene|Acetylcysteine|Acrylamide|Aflatoxin B1|Arsenic|Arsenic Trioxide|Ascorbic Acid|Azacitidine|Benzo(a)pyrene|beta Carotene|Bortezomib|Carbon Tetrachloride|Chlorodiphenyl (54% Chlorine)|Cholesterol|Choline|cinnamic aldehyde|Cisplatin|Curcumin|DDT|Decitabine|deguelin|Dexamethasone|Diethylhexyl Phthalate|Diethylnitrosamine|Di…	122.49	264
CXCL12	6387	Carcinoma, Hepatocellular	MESH:D006528	marker/mechanism	1,4-bis(2-(3,5-dichloropyridyloxy))benzene|2,4-dinitrotoluene|2,6-dinitrotoluene|2-Acetylaminofluorene|4,4'-diaminodiphenylmethane|Acetaminophen|Acetylcysteine|Aflatoxin B1|Arsenic Trioxide|Azacitidine|benz(a)anthracene|Benzo(a)pyrene|beta Carotene|Carbon Tetrachloride|ciprofibrate|Cisplatin|Copper|Curcumin|Cyclophosphamide|cyproconazole|DDT|Decitabine|Dexamethasone|Diethylnitrosamine|Diethylstil…	122.49	279
MAD2L1	4085	Carcinoma, Hepatocellular	MESH:D006528	marker/mechanism	1,4-bis(2-(3,5-dichloropyridyloxy))benzene|2,6-dinitrotoluene|4,4'-diaminodiphenylmethane|Acetaminophen|Aflatoxin B1|Arsenic|Arsenic Trioxide|Azathioprine|Benzo(a)pyrene|benzo(b)fluoranthene|Carbon Tetrachloride|Chlorodiphenyl (54% Chlorine)|Cisplatin|Copper|Dexamethasone|Diethylnitrosamine|Diethylstilbestrol|Docetaxel|Doxorubicin|Estradiol|Ethinyl Estradiol|Fenretinide|Fluorouracil|Hydroxyurea|I…	121.49	265
CDC20	991	Carcinoma, Hepatocellular	MESH:D006528	marker/mechanism	1,4-bis(2-(3,5-dichloropyridyloxy))benzene|4,4'-diaminodiphenylmethane|Acrylamide|Aflatoxin B1|Arsenic|Arsenic Trioxide|Azacitidine|Azathioprine|Benzo(a)pyrene|benzo(b)fluoranthene|Bleomycin|Butylated Hydroxyanisole|Carbon Tetrachloride|Choline|Cisplatin|Copper|Curcumin|Cyclophosphamide|Dichloroacetic Acid|Diethylnitrosamine|Diethylstilbestrol|Dimethylnitrosamine|Doxorubicin|Drugs, Chinese Herbal…	121.01	276
PDK4	5166	Carcinoma, Hepatocellular	MESH:D006528	marker/mechanism	1,4-bis(2-(3,5-dichloropyridyloxy))benzene|2,4-dinitrotoluene|Acetaminophen|Acetylcysteine|Acrylamide|Aflatoxin B1|Azacitidine|Benzo(a)pyrene|benzo(b)fluoranthene|Bezafibrate|Carbon Tetrachloride|Choline|ciprofibrate|Cisplatin|Clodronic Acid|Clofibrate|Dexamethasone|Dichloroacetic Acid|Diethylhexyl Phthalate|Diethylnitrosamine|Doxorubicin|Estradiol|Ethanol|Ethinyl Estradiol|Fenretinide|Indomethac…	119.35	265
STAT1	6772	Carcinoma, Hepatocellular	MESH:D006528	marker/mechanism	2,4-dinitrotoluene|Acetaminophen|Acetylcysteine|Aflatoxin B1|Arsenic|Arsenic Trioxide|Ascorbic Acid|Azathioprine|Benzo(a)pyrene|Biological Products|Carbon Tetrachloride|Cholesterol|Choline|Cisplatin|Colchicine|Curcumin|Cyclophosphamide|DDT|Decitabine|Dexamethasone|Diethylnitrosamine|Diethylstilbestrol|Dimethylnitrosamine|Doxorubicin|epigallocatechin gallate|Estradiol|Ethanol|Ethinyl Estradiol|Eth…	119.26	280
CCNB2	9133	Carcinoma, Hepatocellular	MESH:D006528	marker/mechanism	1,4-bis(2-(3,5-dichloropyridyloxy))benzene|2,6-dinitrotoluene|2-Acetylaminofluorene|2-amino-3,8-dimethylimidazo(4,5-f)quinoxaline|4,4'-diaminodiphenylmethane|Acetaminophen|Acrylamide|Arsenic Trioxide|Benzo(a)pyrene|benzo(b)fluoranthene|Budesonide|Carbon Tetrachloride|Choline|Cisplatin|Copper|Dexamethasone|Dichloroacetic Acid|Diethylnitrosamine|Dimethylnitrosamine|Doxorubicin|Drugs, Chinese Herbal…	118.33	268
CBR1	873	Carcinoma, Hepatocellular	MESH:D006528	marker/mechanism	1,4-bis(2-(3,5-dichloropyridyloxy))benzene|2,4-dinitrotoluene|2,6-dinitrotoluene|2-Acetylaminofluorene|Acetaminophen|Androgens|Arsenic Trioxide|Benzbromarone|Benzo(a)pyrene|Butylated Hydroxyanisole|Carbon Tetrachloride|ciprofibrate|Cisplatin|Clofibrate|Curcumin|Daunorubicin|Dexamethasone|Diethylnitrosamine|Doxorubicin|Drugs, Chinese Herbal|Estradiol|Ethanol|Ethinyl Estradiol|Ethionine|Flavones|Ge…	117.83	256
ACACA	31	Carcinoma, Hepatocellular	MESH:D006528	marker/mechanism	1,4-bis(2-(3,5-dichloropyridyloxy))benzene|2,4-dinitrotoluene|2,6-dinitrotoluene|Acetaminophen|Acrylamide|Aflatoxin B1|Arsenic|Arsenic Trioxide|Benzbromarone|Benzo(a)pyrene|benzo(b)fluoranthene|Bezafibrate|Carbon Tetrachloride|Cholesterol|Choline|Cisplatin|Clofibrate|Copper|Curcumin|Decitabine|Dexamethasone|Dichloroacetic Acid|Diethylnitrosamine|Doxorubicin|Drugs, Chinese Herbal|Estradiol|Ethanol…	117.14	253
GSTP1	2950	Carcinoma, Hepatocellular	MESH:D006528	marker/mechanism	1,4-bis(2-(3,5-dichloropyridyloxy))benzene|2-Acetylaminofluorene|2-amino-3,8-dimethylimidazo(4,5-f)quinoxaline|2-aminofluorene|Acetaminophen|Acetylcysteine|Acrylamide|Aflatoxin B1|alpha-hexachlorocyclohexane|alpha-naphthoflavone|Arsenic|Arsenic Trioxide|benz(a)anthracene|Benzo(a)pyrene|benzo(b)fluoranthene|Butylated Hydroxyanisole|Butylated Hydroxytoluene|Carbon Tetrachloride|Chlorodiphenyl (54% …	116.81	313
FASN	2194	Carcinoma, Hepatocellular	MESH:D006528	marker/mechanism	1,4-bis(2-(3,5-dichloropyridyloxy))benzene|2,4-dinitrotoluene|2,6-dinitrotoluene|Acetaminophen|Acrylamide|Aflatoxin B1|aroclor 1260|Arsenic|Arsenic Trioxide|Benzo(a)pyrene|benzo(b)fluoranthene|beta-hexachlorocyclohexane|Bezafibrate|Carbon Tetrachloride|Chlorodiphenyl (54% Chlorine)|Choline|Cisplatin|Clofibrate|Copper|Curcumin|cyproconazole|DDT|Dexamethasone|Dichloroacetic Acid|Diethylhexyl Phthal…	116.49	296
CTSD	1509	Carcinoma, Hepatocellular	MESH:D006528	marker/mechanism	Acetaminophen|Aflatoxin B1|alpha-naphthoflavone|Arsenic|Arsenic Trioxide|Ascorbic Acid|Benzo(a)pyrene|benzo(b)fluoranthene|Bortezomib|brucine|Carbon Tetrachloride|Choline|Cimetidine|Cisplatin|Clofibrate|Copper|Curcumin|Cyclophosphamide|cyproconazole|DDT|Dexamethasone|Diethylstilbestrol|Dimethylnitrosamine|Doxorubicin|epigallocatechin gallate|Estradiol|Ethanol|Ethinyl Estradiol|Flavonoids|Genistei…	116.13	171
ESR1	2099	Carcinoma, Hepatocellular	MESH:D006528	marker/mechanism	2-Acetylaminofluorene|2-amino-3,8-dimethylimidazo(4,5-f)quinoxaline|2-aminoanthraquinone|Acetaminophen|Acetylcysteine|Aflatoxin B1|alpha-hexachlorocyclohexane|alpha-naphthoflavone|Arsenic|Arsenic Trioxide|Ascorbic Acid|Azacitidine|benz(a)anthracene|Benzo(a)pyrene|benzo(b)fluoranthene|beta Carotene|beta-hexachlorocyclohexane|Bortezomib|Butylated Hydroxyanisole|Carbon Tetrachloride|Chlorodiphenyl (…	115.98	212
DCN	1634	Carcinoma, Hepatocellular	MESH:D006528	marker/mechanism	2,4-dinitrotoluene|Acetaminophen|Aflatoxin B1|Arsenic Trioxide|Azacitidine|benz(a)anthracene|Benzo(a)pyrene|benzo(b)fluoranthene|Carbon Tetrachloride|Choline|Cisplatin|Copper|Curcumin|Cyclophosphamide|Decitabine|Dexamethasone|Diethylhexyl Phthalate|Diethylnitrosamine|Diethylstilbestrol|Dimethylnitrosamine|Doxorubicin|Estradiol|Ethanol|Ethinyl Estradiol|Genistein|Hexachlorocyclohexane|Indomethacin…	114.43	276
HRAS	3265	Carcinoma, Hepatocellular	MESH:D006528	marker/mechanism	1,2-diphenylhydrazine|1-nitropyrene|2,4-dinitrotoluene|2,6-dinitrotoluene|2-Acetylaminofluorene|2-amino-3,4-dimethylimidazo(4,5-f)quinoline|2-amino-3,8-dimethylimidazo(4,5-f)quinoxaline|2-amino-3-methylimidazo(4,5-f)quinoline|Acetaminophen|Acetylcysteine|Acrylamide|Aflatoxin B1|Arsenic|Arsenic Trioxide|Benzo(a)pyrene|Bortezomib|Butylated Hydroxytoluene|Carbon Tetrachloride|Chlorodiphenyl (54% Chl…	113.58	283
E2F1	1869	Carcinoma, Hepatocellular	MESH:D006528	marker/mechanism	1,4-bis(2-(3,5-dichloropyridyloxy))benzene|2-Acetylaminofluorene|Acetaminophen|Acetylcysteine|Aflatoxin B1|Arsenic|Arsenic Trioxide|Azacitidine|Benzo(a)pyrene|Bortezomib|Carbon Tetrachloride|Choline|Cisplatin|Colchicine|Copper|Curcumin|DDT|Decitabine|Diethylnitrosamine|Doxorubicin|Estradiol|Ethinyl Estradiol|Fenretinide|Gefitinib|Hydroxyurea|Iron|Lipopolysaccharides|Methionine|Methotrexate|Niclos…	113.3	266
UBE2C	11065	Carcinoma, Hepatocellular	MESH:D006528	marker/mechanism	1,4-bis(2-(3,5-dichloropyridyloxy))benzene|2-Acetylaminofluorene|Acetaminophen|Aflatoxin B1|Arsenic Trioxide|Azacitidine|Azathioprine|Benzo(a)pyrene|benzo(b)fluoranthene|Carbon Tetrachloride|Chlorodiphenyl (54% Chlorine)|Choline|Cisplatin|Copper|Curcumin|Diethylnitrosamine|Diethylstilbestrol|Doxorubicin|Drugs, Chinese Herbal|Estradiol|Ethinyl Estradiol|Fenretinide|Fluorouracil|gemcitabine|Geniste…	112.6	277
HMGCR	3156	Carcinoma, Hepatocellular	MESH:D006528	marker/mechanism	1,4-bis(2-(3,5-dichloropyridyloxy))benzene|2,2-bis(bromomethyl)-1,3-propanediol|2,6-dinitrotoluene|2-Acetylaminofluorene|4,4'-diaminodiphenylmethane|Acetaminophen|Acetylcysteine|Acrylamide|Aflatoxin B1|alpha-naphthoflavone|Ascorbic Acid|Azathioprine|Benzo(a)pyrene|benzo(b)fluoranthene|Bezafibrate|Butylated Hydroxytoluene|Carbon Tetrachloride|Chlorodiphenyl (54% Chlorine)|Cholesterol|Cholic Acid|C…	111.82	259
BID	637	Carcinoma, Hepatocellular	MESH:D006528	marker/mechanism	1-(3',4',5'-trimethoxyphenyl)-3-(3'',4''-dimethoxy-2'-hydroxyphenyl)propane|1-nitropyrene|2,4-dinitrotoluene|2,6-dinitrotoluene|4,4'-diaminodiphenylmethane|Acetaminophen|Acetylcysteine|Aflatoxin B1|Arsenic|Arsenic Trioxide|Ascorbic Acid|Benzo(a)pyrene|Biological Products|Bortezomib|cinnamic aldehyde|Cisplatin|Copper|Curcumin|cyproconazole|Daunorubicin|Decitabine|Diethylnitrosamine|Doxorubicin|Dru…	111.73	279
IGF2	3481	Carcinoma, Hepatocellular	MESH:D006528	marker/mechanism	2-Acetylaminofluorene|4,4'-diaminodiphenylmethane|Acetaminophen|Aflatoxin B1|alpha-naphthoflavone|Arsenic Trioxide|Benzo(a)pyrene|benzo(b)fluoranthene|Bortezomib|Budesonide|Carbon Tetrachloride|Choline|Cisplatin|Clofibrate|Curcumin|DDT|Decitabine|Dexamethasone|Dichloroacetic Acid|Diethylhexyl Phthalate|Diethylnitrosamine|Diethylstilbestrol|Dimethylnitrosamine|Doxorubicin|epigallocatechin gallate|…	110.42	262
CDKN3	1033	Carcinoma, Hepatocellular	MESH:D006528	marker/mechanism	1,4-bis(2-(3,5-dichloropyridyloxy))benzene|2,6-dinitrotoluene|2-Acetylaminofluorene|4,4'-diaminodiphenylmethane|Acetaminophen|Aflatoxin B1|Arsenic Trioxide|Azathioprine|Benzo(a)pyrene|benzo(b)fluoranthene|Carbon Tetrachloride|Choline|Cisplatin|Clofibrate|Colchicine|Copper|Decitabine|Dexamethasone|Diethylnitrosamine|Dimethylnitrosamine|Doxorubicin|Estradiol|Ethinyl Estradiol|Fluorouracil|Genistein…	110.22	258
IGF1R	3480	Carcinoma, Hepatocellular	MESH:D006528	marker/mechanism	4,4'-diaminodiphenylmethane|Acetaminophen|Acetylcysteine|Aflatoxin B1|Arsenic|Arsenic Trioxide|Ascorbic Acid|Azathioprine|Benzo(a)pyrene|beta-hexachlorocyclohexane|Bortezomib|Carbon Tetrachloride|Chlorodiphenyl (54% Chlorine)|Cisplatin|Clodronic Acid|Copper|Curcumin|deguelin|Dexamethasone|Diethylhexyl Phthalate|Diethylnitrosamine|Diethylstilbestrol|Doxorubicin|epigallocatechin gallate|Estradiol|E…	110.01	303
MET	4233	Carcinoma, Hepatocellular	MESH:D006528	marker/mechanism	1,4-bis(2-(3,5-dichloropyridyloxy))benzene|Acetaminophen|Acrylamide|Aflatoxin B1|Arsenic Trioxide|Ascorbic Acid|Azathioprine|Benzo(a)pyrene|Carbon Tetrachloride|CB 3717|Choline|Cisplatin|cyproconazole|DDT|Decitabine|Diethylnitrosamine|Diethylstilbestrol|Dimethylnitrosamine|Doxorubicin|Drugs, Chinese Herbal|epigallocatechin gallate|Estradiol|Ethanol|Ethinyl Estradiol|Genistein|Lipopolysaccharides|…	109.69	260
IRS1	3667	Carcinoma, Hepatocellular	MESH:D006528	marker/mechanism	1,4-bis(2-(3,5-dichloropyridyloxy))benzene|2,4-dinitrotoluene|Acetaminophen|Acetylcysteine|Acrylamide|Aflatoxin B1|Arsenic Trioxide|Ascorbic Acid|Azathioprine|Benzo(a)pyrene|Bortezomib|Carbon Tetrachloride|Cholesterol|Choline|Cisplatin|Curcumin|Cyclophosphamide|Dexamethasone|Diethylhexyl Phthalate|Diethylnitrosamine|Diethylstilbestrol|Doxorubicin|Estradiol|Ethanol|Ethinyl Estradiol|Genistein|Hexa…	109.01	272
NUSAP1	51203	Carcinoma, Hepatocellular	MESH:D006528	marker/mechanism	1,4-bis(2-(3,5-dichloropyridyloxy))benzene|2-Acetylaminofluorene|4,4'-diaminodiphenylmethane|Acetaminophen|Acrylamide|Aflatoxin B1|Arsenic Trioxide|Azacitidine|Azathioprine|Benzo(a)pyrene|benzo(b)fluoranthene|Carbon Tetrachloride|Chlorodiphenyl (54% Chlorine)|Choline|Cisplatin|Copper|Diethylnitrosamine|Doxorubicin|Estradiol|Ethinyl Estradiol|Fenretinide|Irinotecan|Lipopolysaccharides|Methionine|M…	108.69	269
BTG2	7832	Carcinoma, Hepatocellular	MESH:D006528	marker/mechanism	2,4-dinitrotoluene|2-Acetylaminofluorene|Acetaminophen|Aflatoxin B1|Arsenic Trioxide|benz(a)anthracene|Benzo(a)pyrene|Carbon Tetrachloride|Choline|Cisplatin|Clodronic Acid|Clofibrate|Colchicine|Dexamethasone|Diethylhexyl Phthalate|Diethylnitrosamine|Diethylstilbestrol|Dimethylnitrosamine|Doxorubicin|Estradiol|Ethanol|Ethinyl Estradiol|Ethylnitrosourea|Fluorouracil|Genistein|Hydroxyurea|Indomethac…	108.55	274
MCM2	4171	Carcinoma, Hepatocellular	MESH:D006528	marker/mechanism	1,4-bis(2-(3,5-dichloropyridyloxy))benzene|2,4-dinitrotoluene|2,6-dinitrotoluene|4,4'-diaminodiphenylmethane|Acetaminophen|Acrylamide|Aflatoxin B1|Arsenic Trioxide|Azathioprine|Benzo(a)pyrene|benzo(b)fluoranthene|Carbon Tetrachloride|Choline|Cisplatin|Copper|Curcumin|Dexamethasone|Diethylnitrosamine|Docetaxel|Doxorubicin|Estradiol|Estrogens|Ethinyl Estradiol|Fenretinide|Fluorouracil|Genistein|Ind…	106.97	265
HMGB2	3148	Carcinoma, Hepatocellular	MESH:D006528	marker/mechanism	1,4-bis(2-(3,5-dichloropyridyloxy))benzene|Acetaminophen|Acetylcysteine|Aflatoxin B1|Arsenic|Arsenic Trioxide|Ascorbic Acid|Azathioprine|Benzo(a)pyrene|benzo(b)fluoranthene|Choline|Cisplatin|Copper|Decitabine|Dexamethasone|Diethylnitrosamine|Diethylstilbestrol|Dimethylnitrosamine|Doxorubicin|Estradiol|Ethanol|Ethinyl Estradiol|Fenretinide|Flavonoids|Genistein|Indomethacin|Methionine|Methotrexate|…	106.93	269
HGF	3082	Carcinoma, Hepatocellular	MESH:D006528	marker/mechanism	1,4-bis(2-(3,5-dichloropyridyloxy))benzene|Acetaminophen|Acetylcysteine|alpha-hexachlorocyclohexane|Arsenic|Arsenic Trioxide|Azacitidine|Benzo(a)pyrene|Bleomycin|Carbon Tetrachloride|CB 3717|Choline|ciprofibrate|Copper|Curcumin|DDT|Dexamethasone|Diethylnitrosamine|Dimethylnitrosamine|Doxorubicin|Drugs, Chinese Herbal|epigallocatechin gallate|Estradiol|Ethanol|Ethinyl Estradiol|Fenretinide|Fluorou…	105.74	263
SCD	6319	Carcinoma, Hepatocellular	MESH:D006528	marker/mechanism	2,6-dinitrotoluene|Acetaminophen|Aflatoxin B1|Benzo(a)pyrene|benzo(b)fluoranthene|Bezafibrate|Bortezomib|Carbon Tetrachloride|Cholesterol|Cisplatin|Clofibrate|Copper|Curcumin|cyproconazole|Dexamethasone|Diethylhexyl Phthalate|Dimethylnitrosamine|Doxorubicin|Drugs, Chinese Herbal|epigallocatechin gallate|Estradiol|Ethanol|Ethinyl Estradiol|Fluorouracil|gemcitabine|Genistein|Indomethacin|Lipopolysa…	105.64	152
RRM1	6240	Carcinoma, Hepatocellular	MESH:D006528	marker/mechanism	1,4-bis(2-(3,5-dichloropyridyloxy))benzene|2,6-dinitrotoluene|2-Acetylaminofluorene|Acetaminophen|Aflatoxin B1|Arsenic Trioxide|Azathioprine|benz(a)anthracene|Benzo(a)pyrene|benzo(b)fluoranthene|beta Carotene|Carbon Tetrachloride|Chlorodiphenyl (54% Chlorine)|Cisplatin|Copper|Cyclophosphamide|Dexamethasone|Diethylnitrosamine|Diethylstilbestrol|Doxorubicin|Estradiol|Ethinyl Estradiol|Fenretinide|F…	105.35	256
ACOX1	51	Carcinoma, Hepatocellular	MESH:D006528	marker/mechanism	1,4-bis(2-(3,5-dichloropyridyloxy))benzene|2,6-dinitrotoluene|(2E,4E,6E,10E)-3,7,11,15-tetramethyl-2,4,6,10,14-hexadecapentaenoic acid|Acetaminophen|Aflatoxin B1|Arsenic Trioxide|benz(a)anthracene|Benzo(a)pyrene|beta-hexachlorocyclohexane|Bezafibrate|Carbon Tetrachloride|Chlorodiphenyl (54% Chlorine)|Cholesterol|Choline|ciprofibrate|Clofibrate|Copper|cyproconazole|Dexamethasone|Dichloroacetic Aci…	105.29	253
HSPA9	3313	Carcinoma, Hepatocellular	MESH:D006528	marker/mechanism	4,4'-diaminodiphenylmethane|Acetaminophen|Aflatoxin B1|Arsenic|Arsenic Trioxide|Ascorbic Acid|Benzo(a)pyrene|Butylated Hydroxytoluene|Carbon Tetrachloride|Chlorodiphenyl (54% Chlorine)|Cisplatin|Clofibrate|Copper|Cyclophosphamide|Decitabine|Dexamethasone|dicyclanil|Diethylhexyl Phthalate|Diethylstilbestrol|Dimethylnitrosamine|Doxorubicin|Estradiol|Ethinyl Estradiol|gallium nitrate|Genistein|Hexac…	104.69	138
SLC2A1	6513	Carcinoma, Hepatocellular	MESH:D006528	marker/mechanism	Acetaminophen|Acrylamide|Aflatoxin B1|alpha-naphthoflavone|Arsenic Trioxide|Ascorbic Acid|Benzo(a)pyrene|Butylated Hydroxyanisole|Butylated Hydroxytoluene|Carbon Tetrachloride|Chlorodiphenyl (54% Chlorine)|Cholic Acid|cinnamic aldehyde|Cisplatin|Clofibrate|Copper|Curcumin|Dexamethasone|Dichloroacetic Acid|Diethylhexyl Phthalate|Diethylnitrosamine|Diethylstilbestrol|Doxorubicin|Drugs, Chinese Herb…	104.37	293
ME1	4199	Carcinoma, Hepatocellular	MESH:D006528	marker/mechanism	1,4-bis(2-(3,5-dichloropyridyloxy))benzene|2,4-dinitrotoluene|4,4'-diaminodiphenylmethane|Acetaminophen|Acetylcysteine|Aflatoxin B1|alpha-hexachlorocyclohexane|Arsenic Trioxide|Benzbromarone|Benzo(a)pyrene|benzo(b)fluoranthene|Bortezomib|Carbon Tetrachloride|Chlorodiphenyl (54% Chlorine)|Cisplatin|Clodronic Acid|Clofibrate|Dexamethasone|Dichloroacetic Acid|Diethylhexyl Phthalate|Diethylnitrosamin…	104.04	257
AURKA	6790	Carcinoma, Hepatocellular	MESH:D006528	marker/mechanism	1,4-bis(2-(3,5-dichloropyridyloxy))benzene|2,4-dinitrotoluene|2,6-dinitrotoluene|Acetaminophen|Aflatoxin B1|Arsenic|Arsenic Trioxide|Azacitidine|Azathioprine|Benzo(a)pyrene|benzo(b)fluoranthene|Carbon Tetrachloride|Cisplatin|Copper|Curcumin|Daunorubicin|Diethylnitrosamine|Diethylstilbestrol|Doxorubicin|epigallocatechin gallate|Estradiol|Estrogens|Ethinyl Estradiol|Fenretinide|Flavonoids|Fluoroura…	103.95	276
ABCB4	5244	Carcinoma, Hepatocellular	MESH:D006528	marker/mechanism	1,4-bis(2-(3,5-dichloropyridyloxy))benzene|2,6-dinitrotoluene|4,4'-diaminodiphenylmethane|Acetaminophen|Aflatoxin B1|alpha-hexachlorocyclohexane|Arsenic Trioxide|Azathioprine|Benzbromarone|Benzo(a)pyrene|benzo(b)fluoranthene|Bezafibrate|Carbon Tetrachloride|Cholesterol|Cholic Acid|ciprofibrate|Clofibrate|Dexamethasone|Dichloroacetic Acid|Diethylhexyl Phthalate|Diethylnitrosamine|Docetaxel|Doxorub…	103.15	269
CDC25C	995	Carcinoma, Hepatocellular	MESH:D006528	marker/mechanism	1,4-bis(2-(3,5-dichloropyridyloxy))benzene|2-(2-hydroxyethylsulfanyl)-3-methyl-1,4-naphthoquinone|2-amino-3,8-dimethylimidazo(4,5-f)quinoxaline|2-Methoxyestradiol|Acetaminophen|Acetylcysteine|Acrylamide|alpha-naphthoflavone|Arsenic|Arsenic Trioxide|Azathioprine|Benzo(a)pyrene|Choline|Cisplatin|Clofibrate|Curcumin|Decitabine|Dichloroacetic Acid|Diethylnitrosamine|Diethylstilbestrol|Doxorubicin|Dru…	102.79	254
NR1H4	9971	Carcinoma, Hepatocellular	MESH:D006528	marker/mechanism	1,4-bis(2-(3,5-dichloropyridyloxy))benzene|4,4'-diaminodiphenylmethane|Acetaminophen|Acrylamide|Aflatoxin B1|Benzo(a)pyrene|beta-hexachlorocyclohexane|Bezafibrate|Bortezomib|Carbon Tetrachloride|Cholesterol|Cholic Acid|Cisplatin|Clofibrate|Colchicine|Copper|Cyclophosphamide|Daunorubicin|Dexamethasone|Dichloroacetic Acid|Diethylhexyl Phthalate|Diethylnitrosamine|Docetaxel|Doxorubicin|epigallocatec…	102.79	264
ISG15	9636	Carcinoma, Hepatocellular	MESH:D006528	marker/mechanism	Acetaminophen|Aflatoxin B1|Arsenic Trioxide|Azathioprine|benz(a)anthracene|Benzo(a)pyrene|chloroquine diphosphate|Cholesterol|Cisplatin|Clofibrate|Copper|Cyclophosphamide|Decitabine|Dexamethasone|Dichloroacetic Acid|Diethylhexyl Phthalate|Diethylstilbestrol|Doxorubicin|Estradiol|Ethinyl Estradiol|Fluorouracil|Genistein|Indomethacin|Lipopolysaccharides|Meloxicam|Methotrexate|Methyltestosterone|N-(…	101.87	123
PKM	5315	Carcinoma, Hepatocellular	MESH:D006528	marker/mechanism	2,4-dinitrotoluene|2-Acetylaminofluorene|4,4'-diaminodiphenylmethane|Acetaminophen|Acetylcysteine|Acrylamide|Aflatoxin B1|alpha-naphthoflavone|Arsenic|Arsenic Trioxide|Ascorbic Acid|Azacitidine|Benzo(a)pyrene|Carbon Tetrachloride|Choline|cinnamic aldehyde|Cisplatin|Copper|Decitabine|Dexamethasone|Diethylhexyl Phthalate|Doxorubicin|Drugs, Chinese Herbal|Estradiol|Ethanol|Ethinyl Estradiol|Genistei…	101.13	157
GLUL	2752	Carcinoma, Hepatocellular	MESH:D006528	marker/mechanism	1,4-bis(2-(3,5-dichloropyridyloxy))benzene|2,6-dinitrotoluene|4,4'-diaminodiphenylmethane|Acetaminophen|Acrylamide|Aflatoxin B1|Arsenic Trioxide|Benzo(a)pyrene|Carbon Tetrachloride|Chlorodiphenyl (54% Chlorine)|Choline|Clofibrate|Copper|Dexamethasone|Diethylnitrosamine|Diethylstilbestrol|Doxorubicin|Drugs, Chinese Herbal|Estradiol|Ethanol|Ethinyl Estradiol|Fenretinide|Genistein|Hexachlorocyclohex…	100.9	271
ABCB1	5243	Carcinoma, Hepatocellular	MESH:D006528	marker/mechanism	2-Acetylaminofluorene|Acetaminophen|Acetylcysteine|Aflatoxin B1|Arsenic|Arsenic Trioxide|Ascorbic Acid|Azathioprine|Benzo(a)pyrene|Bezafibrate|Bortezomib|Budesonide|Carbon Tetrachloride|Choline|Cisplatin|Clofibrate|Colchicine|Copper|Curcumin|Cyclophosphamide|Daunorubicin|DDT|Decitabine|Dexamethasone|Diethylhexyl Phthalate|Diethylnitrosamine|Diethylstilbestrol|Dimethylnitrosamine|Docetaxel|Doxorub…	100.2	299
MPO	4353	Carcinoma, Hepatocellular	MESH:D006528	marker/mechanism	2-aminofluorene|3-amino-1-methyl-5H-pyrido(4,3-b)indole|Acetaminophen|Acetylcysteine|Acrylamide|Active Hexose Correlated Compound|Aflatoxin B1|Arsenic|Arsenic Trioxide|Ascorbic Acid|Benzo(a)pyrene|Bleomycin|Budesonide|Carbon Tetrachloride|cinnamic aldehyde|Cisplatin|Colchicine|Copper|Curcumin|Cyclophosphamide|Decitabine|Dexamethasone|Dichloroacetic Acid|Diethylhexyl Phthalate|Doxorubicin|Drugs, C…	100.15	137
CENPE	1062	Carcinoma, Hepatocellular	MESH:D006528	marker/mechanism	1,4-bis(2-(3,5-dichloropyridyloxy))benzene|4,4'-diaminodiphenylmethane|Acetaminophen|Aflatoxin B1|Arsenic|Azathioprine|Benzo(a)pyrene|benzo(b)fluoranthene|beta Carotene|Carbon Tetrachloride|Choline|Cisplatin|Dichloroacetic Acid|Doxorubicin|epigallocatechin gallate|Estradiol|Ethinyl Estradiol|Genistein|Irinotecan|Methionine|Methyltestosterone|N-nitrosomorpholine|Phenobarbital|pirinixic acid|Plant …	99.78	163
PLK1	5347	Carcinoma, Hepatocellular	MESH:D006528	marker/mechanism	1,4-bis(2-(3,5-dichloropyridyloxy))benzene|2,4-dinitrotoluene|Acetaminophen|Aflatoxin B1|Ascorbic Acid|Benzo(a)pyrene|benzo(b)fluoranthene|Butylated Hydroxyanisole|Carbon Tetrachloride|Choline|Cisplatin|Clofibrate|Copper|Curcumin|Diethylnitrosamine|Doxorubicin|Drugs, Chinese Herbal|Estradiol|Ethinyl Estradiol|Fenretinide|Fluorouracil|gemcitabine|Genistein|Irinotecan|Methionine|Methotrexate|Methyl…	98.7	261
GHR	2690	Carcinoma, Hepatocellular	MESH:D006528	marker/mechanism	2,4-dinitrotoluene|2,6-dinitrotoluene|4,4'-diaminodiphenylmethane|Acetaminophen|Acrylamide|Aflatoxin B1|Benzo(a)pyrene|Bortezomib|Carbon Tetrachloride|Chlorodiphenyl (54% Chlorine)|Choline|Cisplatin|Clofibrate|cyproconazole|Dexamethasone|Diethylnitrosamine|Dimethylnitrosamine|Doxorubicin|Estradiol|Ethanol|Ethinyl Estradiol|Fenretinide|Genistein|Indomethacin|malachite green|Methionine|nimesulide|P…	98.31	250
DPYD	1806	Carcinoma, Hepatocellular	MESH:D006528	marker/mechanism	2,4-dinitrotoluene|2,6-dinitrotoluene|4,4'-diaminodiphenylmethane|Acetaminophen|Aflatoxin B1|Arsenic Trioxide|Azacitidine|Azathioprine|Benzbromarone|Benzo(a)pyrene|Carbon Tetrachloride|Cisplatin|Clofibrate|Decitabine|Diethylhexyl Phthalate|Diethylnitrosamine|Diethylstilbestrol|Dimethylnitrosamine|Docetaxel|Epirubicin|Estradiol|Ethionine|Fenretinide|Fluorouracil|gemcitabine|Irinotecan|Leucovorin|L…	98.15	253
RARA	5914	Carcinoma, Hepatocellular	MESH:D006528	marker/mechanism	1,4-bis(2-(3,5-dichloropyridyloxy))benzene|4,4'-diaminodiphenylmethane|Aflatoxin B1|Arsenic Trioxide|benz(a)anthracene|Benzo(a)pyrene|beta Carotene|Carbon Tetrachloride|Choline|Cisplatin|Clodronic Acid|Curcumin|Cyclophosphamide|Decitabine|Dexamethasone|Diethylnitrosamine|Doxorubicin|epigallocatechin gallate|Epirubicin|Estradiol|Estrogens|Ethanol|Ethinyl Estradiol|Fenretinide|Griseofulvin|Hexachlo…	98.04	253
TYMS	7298	Carcinoma, Hepatocellular	MESH:D006528	marker/mechanism	2,4-dinitrotoluene|2,6-dinitrotoluene|Acetaminophen|Aflatoxin B1|Arsenic Trioxide|Azathioprine|Benzo(a)pyrene|Carbon Tetrachloride|CB 3717|Cisplatin|Copper|cyproconazole|Daunorubicin|DDT|Decitabine|Diethylnitrosamine|Diethylstilbestrol|Dimethylnitrosamine|Docetaxel|Doxorubicin|Estradiol|Fenretinide|Fluorouracil|Gefitinib|Genistein|Irinotecan|Leucovorin|Lipopolysaccharides|Methotrexate|Methyltesto…	98.03	273
MTOR	2475	Carcinoma, Hepatocellular	MESH:D006528	marker/mechanism	1,4-bis(2-(3,5-dichloropyridyloxy))benzene|2,4-dinitrotoluene|2,6-dinitrotoluene|Acetaminophen|Acetylcysteine|alpha-naphthoflavone|antroquinonol|Arsenic|Arsenic Trioxide|Azathioprine|Benzo(a)pyrene|Biological Products|Cholesterol|Cisplatin|Clofibrate|Copper|Curcumin|Daunorubicin|deguelin|Dexamethasone|Diethylhexyl Phthalate|Diethylnitrosamine|Doxorubicin|Drugs, Chinese Herbal|Epirubicin|Estradiol…	97.98	276
KRAS	3845	Carcinoma, Hepatocellular	MESH:D006528	marker/mechanism	1-nitropyrene|2,2-bis(bromomethyl)-1,3-propanediol|2,4-dinitrotoluene|2-amino-3,8-dimethylimidazo(4,5-f)quinoxaline|2-amino-3-methylimidazo(4,5-f)quinoline|Acetaminophen|Acetylcysteine|Arsenic|AZD 6244|Benzo(a)pyrene|benzo(b)fluoranthene|Bleomycin|Butylated Hydroxytoluene|Carbon Tetrachloride|Chlorodiphenyl (54% Chlorine)|Cisplatin|Clofibrate|Copper|Curcumin|Decitabine|Diethylnitrosamine|Dimethyl…	97.83	242
MT1A	4489	Carcinoma, Hepatocellular	MESH:D006528	marker/mechanism	2,4-dinitrotoluene|2-Acetylaminofluorene|4,4'-diaminodiphenylmethane|Acetaminophen|Acetylcysteine|Acrylamide|Aflatoxin B1|Arsenic|Arsenic Trioxide|Ascorbic Acid|Benzo(a)pyrene|cadmium telluride|Carbon Tetrachloride|Chlorodiphenyl (54% Chlorine)|Cisplatin|Copper|Curcumin|Daunorubicin|Decitabine|Dexamethasone|Diethylnitrosamine|Diethylstilbestrol|Dimethylnitrosamine|Doxorubicin|Estradiol|Ethanol|Et…	97.62	251
PTTG1	9232	Carcinoma, Hepatocellular	MESH:D006528	marker/mechanism	2,4-dinitrotoluene|2-Acetylaminofluorene|Acetaminophen|Acrylamide|Aflatoxin B1|Arsenic Trioxide|Benzo(a)pyrene|benzo(b)fluoranthene|Carbon Tetrachloride|Cisplatin|Copper|Decitabine|Diethylnitrosamine|Diethylstilbestrol|Dimethylnitrosamine|Doxorubicin|Estradiol|Ethinyl Estradiol|Ethylnitrosourea|Fenretinide|Fluorouracil|Gefitinib|Irinotecan|Methylnitronitrosoguanidine|Methyltestosterone|nimesulide…	97.34	272
KIF2C	11004	Carcinoma, Hepatocellular	MESH:D006528	marker/mechanism	1,4-bis(2-(3,5-dichloropyridyloxy))benzene|Acetaminophen|Acrylamide|Aflatoxin B1|Azacitidine|Azathioprine|Benzo(a)pyrene|Carbon Tetrachloride|Chlorodiphenyl (54% Chlorine)|Cisplatin|Copper|Dexamethasone|Dichloroacetic Acid|Diethylhexyl Phthalate|Diethylnitrosamine|Doxorubicin|Drugs, Chinese Herbal|Estradiol|Ethinyl Estradiol|Fluorouracil|Genistein|Indomethacin|Methotrexate|Methyltestosterone|Pent…	96.55	249
PHLDA1	22822	Carcinoma, Hepatocellular	MESH:D006528	marker/mechanism	1,4-bis(2-(3,5-dichloropyridyloxy))benzene|4,4'-diaminodiphenylmethane|Acetaminophen|Acrylamide|Aflatoxin B1|Arsenic Trioxide|Ascorbic Acid|Benzo(a)pyrene|benzo(b)fluoranthene|Bortezomib|Carbon Tetrachloride|ciprofibrate|Cisplatin|Clofibrate|Copper|Decitabine|Dichloroacetic Acid|Diethylnitrosamine|Dimethylnitrosamine|Doxorubicin|Estradiol|Ethanol|Ethinyl Estradiol|Genistein|Irinotecan|Lipopolysac…	95.77	245
CENPF	1063	Carcinoma, Hepatocellular	MESH:D006528	marker/mechanism	1,4-bis(2-(3,5-dichloropyridyloxy))benzene|Acetaminophen|Acrylamide|Aflatoxin B1|Arsenic|Azacitidine|Azathioprine|Benzo(a)pyrene|Carbon Tetrachloride|Chlorodiphenyl (54% Chlorine)|Choline|Cisplatin|Copper|Decitabine|Dexamethasone|Diethylnitrosamine|Doxorubicin|Estradiol|Ethinyl Estradiol|Fenretinide|Genistein|Indomethacin|Irinotecan|Methionine|Methotrexate|Methyltestosterone|Paclitaxel|Phenobarbi…	95.35	245
RPS6	6194	Carcinoma, Hepatocellular	MESH:D006528	marker/mechanism	4,4'-diaminodiphenylmethane|Acetaminophen|Arsenic Trioxide|Azacitidine|Benzbromarone|Benzo(a)pyrene|cadmium telluride|Carbon Tetrachloride|Cholesterol|Choline|Cisplatin|Clofibrate|Curcumin|deguelin|Dexamethasone|Diethylhexyl Phthalate|Diethylnitrosamine|Doxorubicin|Estradiol|Ethanol|Ethinyl Estradiol|Ethionine|Flavonoids|Hexachlorocyclohexane|Indomethacin|Lipopolysaccharides|Methionine|Methotrexa…	95.25	245
CDKN2A	1029	Carcinoma, Hepatocellular	MESH:D006528	marker/mechanism	2,4-dinitrotoluene|2-Acetylaminofluorene|Acetaminophen|Aflatoxin B1|Arsenic|Arsenic Trioxide|Ascorbic Acid|Azacitidine|Benzo(a)pyrene|benzo(b)fluoranthene|Carbon Tetrachloride|Cisplatin|Copper|Curcumin|Daunorubicin|DDT|Decitabine|Dichloroacetic Acid|Diethylhexyl Phthalate|Diethylnitrosamine|Dimethylnitrosamine|Docetaxel|Doxorubicin|Drugs, Chinese Herbal|epigallocatechin gallate|Estradiol|Ethylnit…	94.79	261
CDC6	990	Carcinoma, Hepatocellular	MESH:D006528	marker/mechanism	1,4-bis(2-(3,5-dichloropyridyloxy))benzene|4,4'-diaminodiphenylmethane|Acetaminophen|Aflatoxin B1|Arsenic Trioxide|Ascorbic Acid|Azathioprine|Benzo(a)pyrene|Carbon Tetrachloride|Choline|Cisplatin|Colchicine|Diethylnitrosamine|Dimethylnitrosamine|Doxorubicin|Drugs, Chinese Herbal|Estradiol|Estrogens|Ethinyl Estradiol|Fluorouracil|Genistein|Leucovorin|Lipopolysaccharides|Methionine|Methyltestostero…	94.78	259
SOCS3	9021	Carcinoma, Hepatocellular	MESH:D006528	marker/mechanism	1,4-bis(2-(3,5-dichloropyridyloxy))benzene|4,4'-diaminodiphenylmethane|Acetaminophen|Acrylamide|Arsenic|Azacitidine|AZD 6244|Benzo(a)pyrene|benzo(b)fluoranthene|Bortezomib|Carbon Tetrachloride|Choline|Cisplatin|Curcumin|cyproconazole|Decitabine|Diethylhexyl Phthalate|Diethylnitrosamine|Doxorubicin|Drugs, Chinese Herbal|Estradiol|Estrogens|Ethanol|Ethinyl Estradiol|Fenretinide|Genistein|Lipopolysa…	94.58	256
CCL3	6348	Carcinoma, Hepatocellular	MESH:D006528	marker/mechanism	2-amino-3,8-dimethylimidazo(4,5-f)quinoxaline|Acetaminophen|Acetylcysteine|Acrylamide|Aflatoxin B1|aroclor 1260|Arsenic|Arsenic Trioxide|Ascorbic Acid|Benzo(a)pyrene|Bezafibrate|Bleomycin|Bortezomib|Budesonide|Carbon Tetrachloride|Choline|cinnamic aldehyde|Curcumin|Cyclophosphamide|Dexamethasone|Diethylhexyl Phthalate|Diethylnitrosamine|Doxorubicin|epigallocatechin gallate|Estradiol|Estrogens|Eth…	94.54	252
UBD	10537	Carcinoma, Hepatocellular	MESH:D006528	marker/mechanism	4,4'-diaminodiphenylmethane|Acetaminophen|Acrylamide|Aflatoxin B1|Arsenic|Azathioprine|Benzo(a)pyrene|Cholesterol|Choline|Cisplatin|Clofibrate|Cyclophosphamide|Diethylnitrosamine|Diethylstilbestrol|Dimethylnitrosamine|Estradiol|Ethanol|Ethinyl Estradiol|Fenretinide|Irinotecan|Lipopolysaccharides|Methionine|Methotrexate|N-(2-(1,1'-bicyclopropyl)-2-ylphenyl)-3-(difluoromethyl)-1-methyl-1H-pyrazole-…	94.54	232
PDIA3	2923	Carcinoma, Hepatocellular	MESH:D006528	marker/mechanism	2,4-dinitrotoluene|2,6-dinitrotoluene|2-Acetylaminofluorene|Acetaminophen|Arsenic|Arsenic Trioxide|Ascorbic Acid|Benzbromarone|Benzo(a)pyrene|Bleomycin|Carbon Tetrachloride|Chlorodiphenyl (54% Chlorine)|Cisplatin|Clofibrate|Copper|Curcumin|Cyclophosphamide|Diethylnitrosamine|Diethylstilbestrol|Doxorubicin|Drugs, Chinese Herbal|Ethanol|Ethinyl Estradiol|Ethionine|Fenretinide|Flavonoids|Genistein|M…	94.43	253
CP	1356	Carcinoma, Hepatocellular	MESH:D006528	marker/mechanism	2,4-dinitrotoluene|2,6-dinitrotoluene|4,4'-diaminodiphenylmethane|Acetaminophen|Acrylamide|Aflatoxin B1|Arsenic Trioxide|Ascorbic Acid|Benzo(a)pyrene|benzo(b)fluoranthene|Bleomycin|Chlorodiphenyl (54% Chlorine)|Cisplatin|Clofibrate|Colchicine|Copper|Dexamethasone|Diethylnitrosamine|Diethylstilbestrol|Doxorubicin|Estradiol|Ethinyl Estradiol|Fenretinide|Fluorouracil|Genistein|Indomethacin|Iron|Lipo…	94.25	258
TLR4	7099	Carcinoma, Hepatocellular	MESH:D006528	marker/mechanism	2-cyano-3,12-dioxooleana-1,9(11)-dien-28-oic acid ethyl amide|Acetaminophen|Acetylcysteine|Active Hexose Correlated Compound|Aflatoxin B1|Arsenic|Ascorbic Acid|Azathioprine|Benzo(a)pyrene|Bortezomib|Carbon Tetrachloride|Cholesterol|Choline|cinnamic aldehyde|Cisplatin|Copper|Curcumin|Daunorubicin|Decitabine|Dexamethasone|Dimethylnitrosamine|Doxorubicin|epigallocatechin gallate|Estradiol|Ethanol|Fe…	93.99	116
CCN1	3491	Carcinoma, Hepatocellular	MESH:D006528	marker/mechanism	1,4-bis(2-(3,5-dichloropyridyloxy))benzene|Acetaminophen|Acetylcysteine|Aflatoxin B1|Arsenic|Arsenic Trioxide|Azathioprine|Benzo(a)pyrene|benzo(b)fluoranthene|chloroquine diphosphate|Choline|Cisplatin|Copper|Dexamethasone|Diethylnitrosamine|Diethylstilbestrol|Doxorubicin|Estradiol|Ethinyl Estradiol|Fenretinide|Fluorouracil|Genistein|Irinotecan|Lipopolysaccharides|Methionine|Methotrexate|N-(2-(1,1…	93.95	272
STMN1	3925	Carcinoma, Hepatocellular	MESH:D006528	marker/mechanism	2-Acetylaminofluorene|4,4'-diaminodiphenylmethane|Acetaminophen|Acrylamide|Aflatoxin B1|Androgens|Arsenic Trioxide|Azathioprine|Benzo(a)pyrene|benzo(b)fluoranthene|Bleomycin|Butylated Hydroxytoluene|Carbon Tetrachloride|Cholic Acid|Cisplatin|Clofibrate|Copper|Diethylnitrosamine|Diethylstilbestrol|Dimethylnitrosamine|Doxorubicin|Estradiol|Ethanol|Ethinyl Estradiol|Fenretinide|Genistein|Paclitaxel|…	93.57	277
TK1	7083	Carcinoma, Hepatocellular	MESH:D006528	marker/mechanism	Acetaminophen|Acrylamide|Aflatoxin B1|Arsenic Trioxide|Azathioprine|Benzo(a)pyrene|benzo(b)fluoranthene|Carbon Tetrachloride|Chlorodiphenyl (54% Chlorine)|Cisplatin|Copper|Decitabine|Diethylnitrosamine|Doxorubicin|Estradiol|Ethanol|Ethinyl Estradiol|Fenretinide|Flavonoids|Fluorouracil|Genistein|Methotrexate|Methyltestosterone|N-(2-(1,1'-bicyclopropyl)-2-ylphenyl)-3-(difluoromethyl)-1-methyl-1H-py…	91.9	277
UHRF1	29128	Carcinoma, Hepatocellular	MESH:D006528	marker/mechanism	1,4-bis(2-(3,5-dichloropyridyloxy))benzene|2-amino-3,8-dimethylimidazo(4,5-f)quinoxaline|Acetylcysteine|Aflatoxin B1|Arsenic Trioxide|Ascorbic Acid|Benzo(a)pyrene|benzo(b)fluoranthene|Carbon Tetrachloride|Choline|Cisplatin|Copper|Dexamethasone|Dichloroacetic Acid|Diethylnitrosamine|Estradiol|Ethanol|Ethinyl Estradiol|gemcitabine|Genistein|Indomethacin|Methionine|Methotrexate|Methyltestosterone|Ni…	91.76	237
ACTB	60	Carcinoma, Hepatocellular	MESH:D006528	marker/mechanism	2,4-dinitrotoluene|Acetaminophen|Aflatoxin B1|Arsenic|Arsenic Trioxide|Benzo(a)pyrene|cadmium telluride|Carbon Tetrachloride|Chlorodiphenyl (54% Chlorine)|cinnamic aldehyde|Cisplatin|Clofibrate|Cyclophosphamide|DDT|Dexamethasone|Diethylhexyl Phthalate|Diethylstilbestrol|Doxorubicin|Estradiol|Ethanol|Ethinyl Estradiol|Fluorouracil|Genistein|Hexachlorocyclohexane|Lipopolysaccharides|Nitric Oxide|Ni…	91.37	146
ACLY	47	Carcinoma, Hepatocellular	MESH:D006528	marker/mechanism	2,6-dinitrotoluene|Acetaminophen|Aflatoxin B1|Benzo(a)pyrene|Carbon Tetrachloride|Chlorodiphenyl (54% Chlorine)|Cholesterol|Choline|Clofibrate|Copper|Curcumin|cyproconazole|Dexamethasone|Diethylhexyl Phthalate|Doxorubicin|epigallocatechin gallate|Estradiol|Ethanol|Ethinyl Estradiol|Flavonoids|Genistein|Hexachlorocyclohexane|Indomethacin|Methionine|Methotrexate|N-(2-(1,1'-bicyclopropyl)-2-ylphenyl…	91.28	142
CENPA	1058	Carcinoma, Hepatocellular	MESH:D006528	marker/mechanism	1,4-bis(2-(3,5-dichloropyridyloxy))benzene|Acetaminophen|Acrylamide|Aflatoxin B1|Azacitidine|Azathioprine|Benzo(a)pyrene|benzo(b)fluoranthene|Carbon Tetrachloride|Choline|Cisplatin|Copper|Dexamethasone|Diethylnitrosamine|Doxorubicin|epigallocatechin gallate|Estradiol|Ethinyl Estradiol|Fenretinide|Genistein|Indomethacin|Methionine|Niclosamide|Phenobarbital|pirinixic acid|Quercetin|Resveratrol|sodi…	91.16	246
APOA1	335	Carcinoma, Hepatocellular	MESH:D006528	marker/mechanism	2,4-dinitrotoluene|2,6-dinitrotoluene|Acetaminophen|Aflatoxin B1|Ascorbic Acid|Benzo(a)pyrene|Bezafibrate|Butylated Hydroxytoluene|Carbon Tetrachloride|Chlorodiphenyl (54% Chlorine)|Cholesterol|ciprofibrate|Clofibrate|Copper|Cyproterone Acetate|Dexamethasone|Diethylnitrosamine|Doxorubicin|Drugs, Chinese Herbal|Ethanol|Ethinyl Estradiol|Flavonoids|Genistein|Hexachlorocyclohexane|Lipopolysaccharide…	90.89	263
PBK	55872	Carcinoma, Hepatocellular	MESH:D006528	marker/mechanism	1,4-bis(2-(3,5-dichloropyridyloxy))benzene|Acetaminophen|Aflatoxin B1|Azathioprine|benz(a)anthracene|Benzo(a)pyrene|benzo(b)fluoranthene|Carbon Tetrachloride|Choline|Cisplatin|Copper|Dichloroacetic Acid|Diethylnitrosamine|Doxorubicin|Estradiol|Ethanol|Ethinyl Estradiol|Fenretinide|Genistein|Lipopolysaccharides|Methionine|Methotrexate|Methyltestosterone|Phenobarbital|pirinixic acid|Plant Extracts|…	90.59	256
ENO1	2023	Carcinoma, Hepatocellular	MESH:D006528	marker/mechanism	2,4-dinitrotoluene|2,6-dinitrotoluene|2-Acetylaminofluorene|Acetaminophen|Aflatoxin B1|alpha-naphthoflavone|Arsenic|Benzbromarone|Benzo(a)pyrene|Cisplatin|Clofibrate|Copper|Curcumin|DDT|Decitabine|Dexamethasone|Diethylhexyl Phthalate|Diethylnitrosamine|Diethylstilbestrol|Doxorubicin|Estradiol|Ethanol|Ethinyl Estradiol|Ethionine|Genistein|Indomethacin|Irinotecan|Methotrexate|Methyltestosterone|N-n…	90.4	250
ANXA4	307	Carcinoma, Hepatocellular	MESH:D006528	marker/mechanism	2,4-dinitrotoluene|2,6-dinitrotoluene|4,4'-diaminodiphenylmethane|Acetaminophen|Aflatoxin B1|Arsenic|Benzo(a)pyrene|Bleomycin|Carbon Tetrachloride|Chlorodiphenyl (54% Chlorine)|Cisplatin|Copper|Daunorubicin|Decitabine|Dexamethasone|Dimethylnitrosamine|Doxorubicin|Ethanol|Ethinyl Estradiol|Flavonoids|Fluorouracil|Lipopolysaccharides|malachite green|nimesulide|N-nitrosomorpholine|Paclitaxel|perfluo…	90.31	154
KIF20A	10112	Carcinoma, Hepatocellular	MESH:D006528	marker/mechanism	1,4-bis(2-(3,5-dichloropyridyloxy))benzene|4,4'-diaminodiphenylmethane|Acetaminophen|Aflatoxin B1|Azathioprine|Benzo(a)pyrene|benzo(b)fluoranthene|Carbon Tetrachloride|Choline|Cisplatin|Clofibrate|Colchicine|Copper|Dexamethasone|Dichloroacetic Acid|Diethylhexyl Phthalate|Diethylnitrosamine|Doxorubicin|Drugs, Chinese Herbal|Estradiol|Ethinyl Estradiol|Genistein|Hydroxyurea|Methionine|Methotrexate|…	90.31	238
PTK2	5747	Carcinoma, Hepatocellular	MESH:D006528	marker/mechanism	1,4-bis(2-(3,5-dichloropyridyloxy))benzene|2,4-dinitrotoluene|2,6-dinitrotoluene|Acetaminophen|Acetylcysteine|Acrylamide|Aflatoxin B1|alpha-naphthoflavone|Arsenic|Ascorbic Acid|Benzo(a)pyrene|Cisplatin|Copper|Curcumin|deguelin|Docetaxel|Doxorubicin|epigallocatechin gallate|Estradiol|Ethanol|Ethinyl Estradiol|Flavonoids|Fluorouracil|gemcitabine|Genistein|Indomethacin|Irinotecan|Lipopolysaccharides…	89.87	117
DLGAP5	9787	Carcinoma, Hepatocellular	MESH:D006528	marker/mechanism	1,4-bis(2-(3,5-dichloropyridyloxy))benzene|Acetaminophen|Aflatoxin B1|Ascorbic Acid|Azathioprine|Benzo(a)pyrene|Bortezomib|Chlorodiphenyl (54% Chlorine)|Cisplatin|Clodronic Acid|Copper|Decitabine|Dichloroacetic Acid|Doxorubicin|epigallocatechin gallate|Estradiol|Ethanol|Ethinyl Estradiol|Genistein|Methotrexate|Methyltestosterone|Pentachlorophenol|Phenobarbital|pirinixic acid|Quercetin|Resveratrol…	89.83	146
APEX1	328	Carcinoma, Hepatocellular	MESH:D006528	marker/mechanism	2,4-dinitrotoluene|Acetaminophen|Acetylcysteine|Acrylamide|Aflatoxin B1|Arsenic|Benzo(a)pyrene|Bezafibrate|Carbon Tetrachloride|Chlorodiphenyl (54% Chlorine)|Choline|Cisplatin|Clofibrate|Copper|Cyclophosphamide|cyproconazole|Daunorubicin|Diethylnitrosamine|Diethylstilbestrol|Dimethylnitrosamine|Doxorubicin|Estradiol|Ethinyl Estradiol|Fluorouracil|Methionine|nimesulide|Nitroglycerin|perfluorooctan…	89.75	258
GJB1	2705	Carcinoma, Hepatocellular	MESH:D006528	marker/mechanism	2-Acetylaminofluorene|Acetaminophen|Aflatoxin B1|benz(a)anthracene|Benzbromarone|Benzo(a)pyrene|benzo(b)fluoranthene|Carbon Tetrachloride|Cholesterol|Choline|ciprofibrate|Cisplatin|Clofibrate|Cyclophosphamide|DDT|Decitabine|Dexamethasone|Diethylnitrosamine|Estradiol|Ethinyl Estradiol|Ethionine|Ethylnitrosourea|Fenretinide|Methionine|N-ethyl-N-hydroxyethylnitrosamine|Pentachlorophenol|Phenobarbita…	89.69	232
PRC1	9055	Carcinoma, Hepatocellular	MESH:D006528	marker/mechanism	1,4-bis(2-(3,5-dichloropyridyloxy))benzene|2-Acetylaminofluorene|4,4'-diaminodiphenylmethane|Acetaminophen|Acrylamide|Aflatoxin B1|Arsenic Trioxide|Azathioprine|Benzo(a)pyrene|benzo(b)fluoranthene|Carbon Tetrachloride|Cisplatin|Clodronic Acid|Copper|Daunorubicin|Dichloroacetic Acid|Diethylnitrosamine|Doxorubicin|Drugs, Chinese Herbal|Estradiol|Ethinyl Estradiol|Fenretinide|Fluorouracil|Genistein|…	89.69	251
CEBPD	1052	Carcinoma, Hepatocellular	MESH:D006528	marker/mechanism	1-nitropyrene|2,4-dinitrotoluene|4,4'-diaminodiphenylmethane|Acetaminophen|Acrylamide|Arsenic Trioxide|Benzo(a)pyrene|Carbon Tetrachloride|Cisplatin|Clofibrate|Decitabine|Dexamethasone|Diethylstilbestrol|Dimethylnitrosamine|Doxorubicin|epigallocatechin gallate|Estradiol|Ethanol|Ethinyl Estradiol|Fenretinide|Flavonoids|Genistein|Irinotecan|Lipopolysaccharides|Paclitaxel|Phenobarbital|pirinixic aci…	89.65	165
CXCL14	9547	Carcinoma, Hepatocellular	MESH:D006528	marker/mechanism	1,4-bis(2-(3,5-dichloropyridyloxy))benzene|2,4-dinitrotoluene|4,4'-diaminodiphenylmethane|Acetaminophen|Aflatoxin B1|Arsenic Trioxide|Benzo(a)pyrene|Carbon Tetrachloride|Choline|cinnamic aldehyde|Cisplatin|Copper|Curcumin|Decitabine|Dichloroacetic Acid|Diethylnitrosamine|Diethylstilbestrol|Estradiol|Ethinyl Estradiol|Genistein|Indomethacin|Lipopolysaccharides|Meloxicam|Methionine|Methotrexate|N-n…	89.15	248
IL1RN	3557	Carcinoma, Hepatocellular	MESH:D006528	marker/mechanism	Aflatoxin B1|alpha-naphthoflavone|Arsenic|Arsenic Trioxide|Azathioprine|Benzo(a)pyrene|Carbon Tetrachloride|Cholesterol|Choline|Cisplatin|Clofibrate|Cyclophosphamide|Dexamethasone|Dichloroacetic Acid|Diethylnitrosamine|Doxorubicin|Estradiol|Ethanol|Ethinyl Estradiol|Fenretinide|Fluorouracil|Genistein|Indomethacin|Lipopolysaccharides|Methionine|Methotrexate|Methyltestosterone|Paclitaxel|perfluoroo…	88.85	256
USP2	9099	Carcinoma, Hepatocellular	MESH:D006528	marker/mechanism	1,4-bis(2-(3,5-dichloropyridyloxy))benzene|2,6-dinitrotoluene|Acetaminophen|Acrylamide|Aflatoxin B1|benz(a)anthracene|Benzo(a)pyrene|benzo(b)fluoranthene|Carbon Tetrachloride|Choline|Cisplatin|Copper|Dexamethasone|Dichloroacetic Acid|Diethylhexyl Phthalate|Diethylnitrosamine|Doxorubicin|Estradiol|Ethanol|Ethinyl Estradiol|Methionine|Methotrexate|N-(2-(1,1'-bicyclopropyl)-2-ylphenyl)-3-(difluorome…	88.8	246
NR0B2	8431	Carcinoma, Hepatocellular	MESH:D006528	marker/mechanism	2,4-dinitrotoluene|2-amino-3,8-dimethylimidazo(4,5-f)quinoxaline|4,4'-diaminodiphenylmethane|Acetaminophen|Aflatoxin B1|Benzo(a)pyrene|Bezafibrate|Carbon Tetrachloride|Cholic Acid|Choline|Clofibrate|Cyproterone Acetate|Dexamethasone|Dichloroacetic Acid|Diethylhexyl Phthalate|Diethylnitrosamine|Dimethylnitrosamine|epigallocatechin gallate|Estradiol|Ethanol|Ethinyl Estradiol|Ethylnitrosourea|Hexach…	88.58	248
AKR1B10	57016	Carcinoma, Hepatocellular	MESH:D006528	marker/mechanism	2,6-dinitrotoluene|2-Acetylaminofluorene|2-amino-3-methylimidazo(4,5-f)quinoline|Acetaminophen|Aflatoxin B1|Arsenic Trioxide|Ascorbic Acid|Azathioprine|benz(a)anthracene|Benzo(a)pyrene|Bortezomib|cinnamic aldehyde|ciprofibrate|Cisplatin|Copper|Daunorubicin|DDT|Diethylhexyl Phthalate|Diethylnitrosamine|Diethylstilbestrol|Doxorubicin|Drugs, Chinese Herbal|Estradiol|Ethanol|Ethinyl Estradiol|Ethoxyq…	87.95	270
LIFR	3977	Carcinoma, Hepatocellular	MESH:D006528	marker/mechanism	1,4-bis(2-(3,5-dichloropyridyloxy))benzene|2,6-dinitrotoluene|Acetaminophen|Aflatoxin B1|Arsenic|Benzo(a)pyrene|Carbon Tetrachloride|Choline|Cisplatin|Clofibrate|Dexamethasone|Dichloroacetic Acid|Diethylhexyl Phthalate|Doxorubicin|Estradiol|Ethanol|Ethinyl Estradiol|Fluorouracil|gemcitabine|Indomethacin|Lipopolysaccharides|Methionine|Paclitaxel|Phenobarbital|pirinixic acid|Quercetin|Resveratrol|s…	87.47	154
IGFALS	3483	Carcinoma, Hepatocellular	MESH:D006528	marker/mechanism	1,4-bis(2-(3,5-dichloropyridyloxy))benzene|2,4-dinitrotoluene|2-Acetylaminofluorene|4,4'-diaminodiphenylmethane|Acetaminophen|Acrylamide|Aflatoxin B1|Benzbromarone|Benzo(a)pyrene|Carbon Tetrachloride|Cisplatin|Clofibrate|Copper|cyproconazole|Diethylnitrosamine|Dimethylnitrosamine|Estradiol|Ethinyl Estradiol|Ethionine|Fenretinide|Griseofulvin|nimesulide|perfluorooctanoic acid|pirinixic acid|Plant …	87.4	227
CYP17A1	1586	Carcinoma, Hepatocellular	MESH:D006528	marker/mechanism	1,4-bis(2-(3,5-dichloropyridyloxy))benzene|2,4-dinitrotoluene|Acetaminophen|Acetylcysteine|Aflatoxin B1|alpha-naphthoflavone|Androgens|Arsenic|Arsenic Trioxide|benz(a)anthracene|Benzo(a)pyrene|benzo(b)fluoranthene|Bezafibrate|Biological Products|cadmium telluride|Chlorodiphenyl (54% Chlorine)|Cholesterol|Clofibrate|DDT|Dexamethasone|Diethylhexyl Phthalate|Diethylnitrosamine|Diethylstilbestrol|Dim…	87.19	253
ZWINT	11130	Carcinoma, Hepatocellular	MESH:D006528	marker/mechanism	2,4-dinitrotoluene|2,6-dinitrotoluene|Acetaminophen|Aflatoxin B1|Arsenic Trioxide|Azathioprine|Benzbromarone|Benzo(a)pyrene|Carbon Tetrachloride|Cisplatin|Clofibrate|Dexamethasone|Diethylhexyl Phthalate|Diethylnitrosamine|Doxorubicin|Estradiol|Ethanol|Ethionine|Flavonoids|Genistein|Indomethacin|nimesulide|Pentachlorophenol|pirinixic acid|Resveratrol|Sirolimus|sodium arsenite|sulforafan|Tetrachlor…	87.14	232
BUB1	699	Carcinoma, Hepatocellular	MESH:D006528	marker/mechanism	1,4-bis(2-(3,5-dichloropyridyloxy))benzene|Acetaminophen|Aflatoxin B1|Ascorbic Acid|Azathioprine|Benzo(a)pyrene|Carbon Tetrachloride|Choline|Cisplatin|Decitabine|Dichloroacetic Acid|Diethylnitrosamine|Doxorubicin|epigallocatechin gallate|Estradiol|Ethinyl Estradiol|Fluorouracil|Genistein|Irinotecan|Methionine|Methotrexate|Methyltestosterone|perfluorooctanoic acid|Phenobarbital|pirinixic acid|Quer…	87.08	254
CDCA8	55143	Carcinoma, Hepatocellular	MESH:D006528	marker/mechanism	1,4-bis(2-(3,5-dichloropyridyloxy))benzene|Acetaminophen|Aflatoxin B1|Azathioprine|Benzo(a)pyrene|benzo(b)fluoranthene|beta Carotene|Carbon Tetrachloride|Chlorodiphenyl (54% Chlorine)|Choline|Cisplatin|Diethylnitrosamine|Doxorubicin|Estradiol|Ethinyl Estradiol|Fenretinide|Fluorouracil|Hydroxyurea|Indomethacin|Methionine|Methotrexate|Methyltestosterone|Niclosamide|Pentachlorophenol|Phenobarbital|p…	86.5	237
ADH4	127	Carcinoma, Hepatocellular	MESH:D006528	marker/mechanism	Acetaminophen|Acrylamide|Aflatoxin B1|Benzbromarone|Benzo(a)pyrene|benzo(b)fluoranthene|Carbon Tetrachloride|Cimetidine|Clofibrate|Dexamethasone|Diethylnitrosamine|Dimethylnitrosamine|Drugs, Chinese Herbal|Estradiol|Ethanol|Ethinyl Estradiol|Ethionine|Indomethacin|Niclosamide|Pentachlorophenol|perfluorooctanoic acid|Phenobarbital|pirinixic acid|Quercetin|sodium arsenite|Tetrachlorodibenzodioxin|T…	86.26	212
FST	10468	Carcinoma, Hepatocellular	MESH:D006528	marker/mechanism	4,4'-diaminodiphenylmethane|Acetaminophen|Aflatoxin B1|Arsenic Trioxide|Azathioprine|Benzo(a)pyrene|Carbon Tetrachloride|Cisplatin|Copper|Decitabine|Dexamethasone|Dichloroacetic Acid|Diethylhexyl Phthalate|Diethylnitrosamine|Doxorubicin|Estradiol|Estrogens|Ethanol|Ethinyl Estradiol|Genistein|Indomethacin|Lipopolysaccharides|Methandrostenolone|Methotrexate|Methylnitronitrosoguanidine|perfluoroocta…	85.52	263
GMNN	51053	Carcinoma, Hepatocellular	MESH:D006528	marker/mechanism	1,4-bis(2-(3,5-dichloropyridyloxy))benzene|2,4-dinitrotoluene|2,6-dinitrotoluene|Acetaminophen|Aflatoxin B1|Azathioprine|benz(a)anthracene|Benzo(a)pyrene|benzo(b)fluoranthene|Carbon Tetrachloride|Cisplatin|Clofibrate|Copper|Diethylnitrosamine|Drugs, Chinese Herbal|Estradiol|Ethanol|Ethinyl Estradiol|Fenretinide|Genistein|perfluorooctanoic acid|Phenobarbital|pirinixic acid|Plant Extracts|Resveratr…	85.44	230
AURKB	9212	Carcinoma, Hepatocellular	MESH:D006528	marker/mechanism	1,4-bis(2-(3,5-dichloropyridyloxy))benzene|Acetaminophen|Acrylamide|Aflatoxin B1|Ascorbic Acid|Azathioprine|Benzo(a)pyrene|Butylated Hydroxyanisole|Carbon Tetrachloride|Choline|Cisplatin|Clodronic Acid|Colchicine|Copper|Curcumin|Cyclophosphamide|Diethylnitrosamine|Doxorubicin|Estradiol|Ethinyl Estradiol|Flavonoids|Genistein|Irinotecan|Methionine|Niclosamide|Phenobarbital|pirinixic acid|Quercetin|…	85.26	243
NCAPH	23397	Carcinoma, Hepatocellular	MESH:D006528	marker/mechanism	1,4-bis(2-(3,5-dichloropyridyloxy))benzene|Acetaminophen|Acrylamide|Aflatoxin B1|Arsenic Trioxide|Azathioprine|benz(a)anthracene|Benzo(a)pyrene|benzo(b)fluoranthene|Carbon Tetrachloride|Chlorodiphenyl (54% Chlorine)|Choline|Cisplatin|Copper|Diethylnitrosamine|Doxorubicin|epigallocatechin gallate|Estradiol|Ethinyl Estradiol|Fenretinide|Methionine|Methotrexate|Methyltestosterone|perfluorooctanoic a…	84.81	241
TTK	7272	Carcinoma, Hepatocellular	MESH:D006528	marker/mechanism	1,4-bis(2-(3,5-dichloropyridyloxy))benzene|Acetaminophen|Acrylamide|Aflatoxin B1|Azacitidine|Azathioprine|benz(a)anthracene|Benzo(a)pyrene|Carbon Tetrachloride|Choline|Cisplatin|Clofibrate|Dichloroacetic Acid|Diethylnitrosamine|Doxorubicin|epigallocatechin gallate|Estradiol|Ethinyl Estradiol|Genistein|Irinotecan|Methionine|Methyltestosterone|Phenobarbital|Quercetin|Resveratrol|Sirolimus|sodium ar…	84.78	235
NME1	4830	Carcinoma, Hepatocellular	MESH:D006528	marker/mechanism	2,6-dinitrotoluene|Acetaminophen|Aflatoxin B1|Arsenic Trioxide|Ascorbic Acid|Benzo(a)pyrene|Carbon Tetrachloride|Cisplatin|Clofibrate|Copper|Curcumin|Cyclophosphamide|Diethylnitrosamine|Diethylstilbestrol|Doxorubicin|Estradiol|Ethanol|Ethinyl Estradiol|Flavonoids|Fluorouracil|Indomethacin|nimesulide|Paclitaxel|Phenobarbital|pirinixic acid|Quercetin|Resveratrol|Sirolimus|sodium arsenite|sulforafan…	84.35	269
F2	2147	Carcinoma, Hepatocellular	MESH:D006528	marker/mechanism	2,6-dinitrotoluene|Acetaminophen|Aflatoxin B1|Benzo(a)pyrene|Carbon Tetrachloride|Chlorodiphenyl (54% Chlorine)|Clofibrate|Colchicine|Contraceptives, Oral|Copper|Curcumin|Dexamethasone|Dichloroacetic Acid|Doxorubicin|epigallocatechin gallate|Estradiol|Estrogens|Ethinyl Estradiol|Fluorouracil|Genistein|Hexachlorocyclohexane|Iron|Lipopolysaccharides|Methotrexate|nimesulide|Nitric Oxide|Paclitaxel|p…	84.32	159
SFN	2810	Carcinoma, Hepatocellular	MESH:D006528	marker/mechanism	2-Acetylaminofluorene|Acetaminophen|Aflatoxin B1|Arsenic|Arsenic Trioxide|Azathioprine|benz(a)anthracene|Benzo(a)pyrene|Bortezomib|Carbon Tetrachloride|Choline|Cisplatin|Clodronic Acid|Copper|Cyclophosphamide|Decitabine|Diethylnitrosamine|Diethylstilbestrol|Dimethylnitrosamine|Doxorubicin|Estradiol|Ethanol|Ethinyl Estradiol|Fluorouracil|Gefitinib|gemcitabine|Irinotecan|Methionine|Methotrexate|pir…	84.16	258
RACGAP1	29127	Carcinoma, Hepatocellular	MESH:D006528	marker/mechanism	1,4-bis(2-(3,5-dichloropyridyloxy))benzene|Acetaminophen|Acrylamide|Aflatoxin B1|Arsenic Trioxide|Azacitidine|Azathioprine|Benzo(a)pyrene|benzo(b)fluoranthene|Carbon Tetrachloride|Chlorodiphenyl (54% Chlorine)|Cisplatin|Copper|Dexamethasone|Dichloroacetic Acid|Diethylnitrosamine|Doxorubicin|Estradiol|Ethinyl Estradiol|Fenretinide|Genistein|Indomethacin|Methylnitronitrosoguanidine|Phenobarbital|pi…	84.13	255
TGFA	7039	Carcinoma, Hepatocellular	MESH:D006528	marker/mechanism	1,4-bis(2-(3,5-dichloropyridyloxy))benzene|Acetaminophen|Acetylcysteine|Androgens|Arsenic|Arsenic Trioxide|Butylated Hydroxytoluene|Carbon Tetrachloride|Cisplatin|cyproconazole|Decitabine|Dexamethasone|Diethylnitrosamine|Diethylstilbestrol|Doxorubicin|Estradiol|Ethanol|Ethinyl Estradiol|Fenretinide|Fluorouracil|Gefitinib|Genistein|Irinotecan|Lipopolysaccharides|Melitten|Methotrexate|Phenobarbital…	84.09	268
PRDX1	5052	Carcinoma, Hepatocellular	MESH:D006528	marker/mechanism	1,4-bis(2-(3,5-dichloropyridyloxy))benzene|Acetaminophen|Acrylamide|Aflatoxin B1|Arsenic|Arsenic Trioxide|Ascorbic Acid|benz(a)anthracene|Benzo(a)pyrene|Carbon Tetrachloride|Cisplatin|Copper|Diethylnitrosamine|Doxorubicin|Estradiol|Ethanol|Ethinyl Estradiol|Ethoxyquin|Flavonoids|Genistein|Lipopolysaccharides|Methotrexate|Methyltestosterone|nimesulide|N-nitrosomorpholine|O(2)-(2,4-dinitrophenyl) 1…	83.83	261
NEK2	4751	Carcinoma, Hepatocellular	MESH:D006528	marker/mechanism	1,4-bis(2-(3,5-dichloropyridyloxy))benzene|2-amino-3,8-dimethylimidazo(4,5-f)quinoxaline|Acetaminophen|Acrylamide|Aflatoxin B1|Azathioprine|Benzo(a)pyrene|Carbon Tetrachloride|Cisplatin|Copper|Decitabine|deguelin|Dichloroacetic Acid|Diethylnitrosamine|Drugs, Chinese Herbal|Estradiol|Fluorouracil|Irinotecan|N-(2-(1,1'-bicyclopropyl)-2-ylphenyl)-3-(difluoromethyl)-1-methyl-1H-pyrazole-4-carboxamide…	83.5	231
PZP	5858	Carcinoma, Hepatocellular	MESH:D006528	marker/mechanism	2,4-dinitrotoluene|2,6-dinitrotoluene|Acetaminophen|Acrylamide|Aflatoxin B1|Arsenic Trioxide|Benzbromarone|Benzo(a)pyrene|Bleomycin|Choline|Clofibrate|Dichloroacetic Acid|Diethylnitrosamine|Doxorubicin|Estradiol|Ethanol|Ethinyl Estradiol|Ethionine|Flavonoids|Genistein|Methionine|perfluorooctanoic acid|Phenobarbital|pirinixic acid|Plant Preparations|sodium arsenite|Tetrachlorodibenzodioxin|Thioace…	83.15	220
LCAT	3931	Carcinoma, Hepatocellular	MESH:D006528	marker/mechanism	Acetaminophen|Aflatoxin B1|Benzbromarone|Benzo(a)pyrene|Cholesterol|Cholic Acid|Choline|Cisplatin|Clofibrate|Copper|Decitabine|Dexamethasone|Diethylnitrosamine|Doxorubicin|epigallocatechin gallate|Ethanol|Ethionine|Fenretinide|Flavonoids|Lipopolysaccharides|Methionine|Niclosamide|perfluorooctanoic acid|Phenobarbital|Phenytoin|pirinixic acid|Quercetin|Resveratrol|sodium arsenite|Sodium Selenite|St…	82.88	226
FDFT1	2222	Carcinoma, Hepatocellular	MESH:D006528	marker/mechanism	1,4-bis(2-(3,5-dichloropyridyloxy))benzene|2,4-dinitrotoluene|2,6-dinitrotoluene|Acetaminophen|Aflatoxin B1|Benzbromarone|Benzo(a)pyrene|Cholesterol|Cisplatin|Clofibrate|Copper|Curcumin|cyproconazole|Decitabine|Dexamethasone|Diethylhexyl Phthalate|Diethylnitrosamine|Dimethylnitrosamine|Doxorubicin|Estradiol|Ethanol|Ethinyl Estradiol|Ethionine|Ethylnitrosourea|Indomethacin|Methyltestosterone|Pacli…	82.81	240
FOXM1	2305	Carcinoma, Hepatocellular	MESH:D006528	marker/mechanism	1,4-bis(2-(3,5-dichloropyridyloxy))benzene|2,4-dinitrotoluene|Acetaminophen|Aflatoxin B1|Arsenic Trioxide|Azathioprine|Benzo(a)pyrene|beta Carotene|Butylated Hydroxytoluene|Carbon Tetrachloride|Choline|Cisplatin|Copper|Dichloroacetic Acid|Diethylnitrosamine|Doxorubicin|Estradiol|Lipopolysaccharides|Methionine|Methotrexate|Niclosamide|Phenobarbital|pirinixic acid|Quercetin|Resveratrol|Sirolimus|so…	82.61	252
BUB1B	701	Carcinoma, Hepatocellular	MESH:D006528	marker/mechanism	1,4-bis(2-(3,5-dichloropyridyloxy))benzene|Acetaminophen|Acrylamide|Aflatoxin B1|Arsenic Trioxide|Azacitidine|Azathioprine|Benzo(a)pyrene|Carbon Tetrachloride|Choline|Cisplatin|Copper|Decitabine|Dichloroacetic Acid|Diethylstilbestrol|Docetaxel|Doxorubicin|Estradiol|Ethinyl Estradiol|Fluorouracil|Genistein|Methionine|Methotrexate|Paclitaxel|Phenobarbital|pirinixic acid|Quercetin|Resveratrol|Siroli…	82.29	153
MT2A	4502	Carcinoma, Hepatocellular	MESH:D006528	marker/mechanism	4,4'-diaminodiphenylmethane|Acetylcysteine|Acrylamide|Aflatoxin B1|Arsenic|Arsenic Trioxide|Benzo(a)pyrene|Budesonide|Cisplatin|Copper|Curcumin|DDT|Decitabine|Dexamethasone|Diethylnitrosamine|Diethylstilbestrol|Dimethylnitrosamine|Doxorubicin|epigallocatechin gallate|Estradiol|Ethanol|Ethinyl Estradiol|gallium nitrate|Genistein|Indomethacin|Iron|Lipopolysaccharides|Niclosamide|Paclitaxel|Phenobar…	82.22	250
PRDX2	7001	Carcinoma, Hepatocellular	MESH:D006528	marker/mechanism	Acetaminophen|Arsenic|Arsenic Trioxide|Benzbromarone|Benzo(a)pyrene|Bleomycin|Carbon Tetrachloride|Cisplatin|Clofibrate|Copper|Decitabine|Dexamethasone|Diethylnitrosamine|Doxorubicin|Drugs, Chinese Herbal|Estradiol|Ethanol|Ethinyl Estradiol|Ethionine|Flavonoids|Genistein|Indomethacin|mancozeb|Methotrexate|N-nitrosomorpholine|Paclitaxel|pirinixic acid|Quercetin|Resveratrol|sodium arsenite|Streptoz…	81.96	243
APCS	325	Carcinoma, Hepatocellular	MESH:D006528	marker/mechanism	2,6-dinitrotoluene|Acetaminophen|Acrylamide|Aflatoxin B1|Arsenic|Benzbromarone|Benzo(a)pyrene|Carbon Tetrachloride|Choline|ciprofibrate|Clofibrate|Copper|Dichloroacetic Acid|Diethylhexyl Phthalate|Diethylnitrosamine|Estradiol|Ethinyl Estradiol|Ethionine|gemcitabine|Lipopolysaccharides|Methionine|perfluorooctanoic acid|Phenobarbital|pirinixic acid|Plant Preparations|sodium arsenite|Tamoxifen|Tetra…	81.61	227
ACO2	50	Carcinoma, Hepatocellular	MESH:D006528	marker/mechanism	2,6-dinitrotoluene|4,4'-diaminodiphenylmethane|Acetaminophen|Arsenic Trioxide|Benzbromarone|Chlorodiphenyl (54% Chlorine)|Choline|Cisplatin|Clofibrate|Copper|Curcumin|Dexamethasone|Diethylnitrosamine|Docetaxel|Doxorubicin|Estradiol|Ethanol|Ethinyl Estradiol|Ethionine|Hexachlorocyclohexane|Iron|Methionine|Methotrexate|nimesulide|perfluorooctanoic acid|pirinixic acid|sodium arsenite|Streptozocin|su…	81.51	224
SPC25	57405	Carcinoma, Hepatocellular	MESH:D006528	marker/mechanism	1,4-bis(2-(3,5-dichloropyridyloxy))benzene|Acetaminophen|Acrylamide|Aflatoxin B1|Arsenic|Arsenic Trioxide|Azathioprine|benz(a)anthracene|Benzo(a)pyrene|benzo(b)fluoranthene|Carbon Tetrachloride|Cisplatin|Copper|Dichloroacetic Acid|Diethylhexyl Phthalate|Diethylnitrosamine|Estradiol|Ethanol|Ethinyl Estradiol|Fenretinide|Methotrexate|Methyltestosterone|Phenobarbital|pirinixic acid|Quercetin|Resvera…	81.45	245
CDCA5	113130	Carcinoma, Hepatocellular	MESH:D006528	marker/mechanism	Acetaminophen|Acrylamide|Aflatoxin B1|Arsenic|Azathioprine|Benzo(a)pyrene|benzo(b)fluoranthene|Carbon Tetrachloride|Choline|Cisplatin|Copper|Dexamethasone|Diethylnitrosamine|Doxorubicin|Estradiol|Ethinyl Estradiol|Fluorouracil|Genistein|Indomethacin|Methionine|Methyltestosterone|Niclosamide|Phenobarbital|pirinixic acid|Quercetin|Resveratrol|sodium arsenite|Tetrachlorodibenzodioxin|Trichloroethyle…	81.23	240
IRS2	8660	Carcinoma, Hepatocellular	MESH:D006528	marker/mechanism	2,4-dinitrotoluene|2,6-dinitrotoluene|Acetaminophen|Acetylcysteine|Aflatoxin B1|Benzo(a)pyrene|Carbon Tetrachloride|Cisplatin|Copper|Curcumin|Decitabine|Dexamethasone|Diethylhexyl Phthalate|Diethylnitrosamine|Doxorubicin|epigallocatechin gallate|Estradiol|Ethanol|Fenretinide|Flavonoids|Genistein|Lipopolysaccharides|N-nitrosomorpholine|Phenobarbital|pirinixic acid|Plant Extracts|Resveratrol|sodium…	81.03	243
TPX2	22974	Carcinoma, Hepatocellular	MESH:D006528	marker/mechanism	1,4-bis(2-(3,5-dichloropyridyloxy))benzene|Acetaminophen|Aflatoxin B1|Azathioprine|Benzo(a)pyrene|benzo(b)fluoranthene|Carbon Tetrachloride|Choline|Cisplatin|Copper|Dexamethasone|Dichloroacetic Acid|Doxorubicin|Drugs, Chinese Herbal|Estradiol|Ethinyl Estradiol|Indomethacin|Irinotecan|Methionine|Methyltestosterone|Niclosamide|perfluorooctanoic acid|Phenobarbital|Resveratrol|sodium arsenite|Tetrach…	80.82	127
RAC1	5879	Carcinoma, Hepatocellular	MESH:D006528	marker/mechanism	2,4-dinitrotoluene|2-Acetylaminofluorene|Acetylcysteine|Arsenic Trioxide|Ascorbic Acid|Azathioprine|Carbon Tetrachloride|Cholesterol|cinnamic aldehyde|Cisplatin|Copper|deguelin|Dexamethasone|Diethylnitrosamine|Diethylstilbestrol|Doxorubicin|epigallocatechin gallate|Estradiol|Ethanol|Ethinyl Estradiol|Flavonoids|Genistein|Lipopolysaccharides|Melitten|Methotrexate|Paclitaxel|Plant Extracts|Resverat…	80.67	236
CDCA3	83461	Carcinoma, Hepatocellular	MESH:D006528	marker/mechanism	1,4-bis(2-(3,5-dichloropyridyloxy))benzene|2-Acetylaminofluorene|Acetaminophen|Aflatoxin B1|Arsenic|Azathioprine|Benzo(a)pyrene|benzo(b)fluoranthene|Carbon Tetrachloride|Cisplatin|Copper|Decitabine|Dichloroacetic Acid|Diethylnitrosamine|Doxorubicin|Drugs, Chinese Herbal|epigallocatechin gallate|Estradiol|Ethinyl Estradiol|Fenretinide|Irinotecan|perfluorooctanoic acid|Phenobarbital|pirinixic acid|…	80.51	233
TERT	7015	Carcinoma, Hepatocellular	MESH:D006528	marker/mechanism	1,4-bis(2-(3,5-dichloropyridyloxy))benzene|4,4'-diaminodiphenylmethane|Acetylcysteine|Aflatoxin B1|Arsenic|Arsenic Trioxide|Azacitidine|Benzo(a)pyrene|Bleomycin|Choline|Cisplatin|Curcumin|Decitabine|Diethylnitrosamine|Doxorubicin|Drugs, Chinese Herbal|epigallocatechin gallate|Estradiol|Fluorouracil|Gefitinib|gemcitabine|Genistein|Iron|Paclitaxel|pterostilbene|pyrazolanthrone|Quercetin|Resveratrol…	80.12	247
MYBL2	4605	Carcinoma, Hepatocellular	MESH:D006528	marker/mechanism	Acetaminophen|Acrylamide|Aflatoxin B1|Ascorbic Acid|Benzo(a)pyrene|Cisplatin|Copper|Dexamethasone|Doxorubicin|Estradiol|Ethinyl Estradiol|Fluorouracil|Genistein|Indomethacin|Lipopolysaccharides|Methotrexate|Methyltestosterone|Phenobarbital|pirinixic acid|Quercetin|Resveratrol|Sirolimus|sodium arsenite|sulforafan|Tamoxifen|Tetrachlorodibenzodioxin|Tetradecanoylphorbol Acetate|Thioacetamide|Topotec…	80.06	141
PGD	5226	Carcinoma, Hepatocellular	MESH:D006528	marker/mechanism	Acetaminophen|Acetylcysteine|Aflatoxin B1|Arsenic Trioxide|benz(a)anthracene|Benzo(a)pyrene|Carbon Tetrachloride|Chlorodiphenyl (54% Chlorine)|Choline|Cisplatin|Clofibrate|Curcumin|Dexamethasone|Diethylhexyl Phthalate|Diethylnitrosamine|Estradiol|Ethanol|Ethinyl Estradiol|Fenretinide|Hexachlorocyclohexane|Lipopolysaccharides|Methionine|Pentachlorophenol|Phenobarbital|pirinixic acid|Plant Extracts…	79.81	249
KIF23	9493	Carcinoma, Hepatocellular	MESH:D006528	marker/mechanism	Acetaminophen|Aflatoxin B1|Arsenic|Ascorbic Acid|Azathioprine|Benzo(a)pyrene|benzo(b)fluoranthene|Carbon Tetrachloride|Choline|Cisplatin|Clofibrate|Copper|Diethylnitrosamine|Doxorubicin|Estradiol|Ethinyl Estradiol|Fenretinide|Fluorouracil|Genistein|Methotrexate|Pentachlorophenol|perfluorooctanoic acid|pirinixic acid|Quercetin|Resveratrol|sodium arsenite|Tamoxifen|Tetrachlorodibenzodioxin|Tetradec…	79.6	246
CRP	1401	Carcinoma, Hepatocellular	MESH:D006528	marker/mechanism	1,4-bis(2-(3,5-dichloropyridyloxy))benzene|Acetaminophen|Acetylcysteine|Acrylamide|Aflatoxin B1|Arsenic|Arsenic Trioxide|Ascorbic Acid|Benzbromarone|Benzo(a)pyrene|Bezafibrate|Cholic Acid|Copper|Curcumin|cyproconazole|Cyproterone Acetate|Diethylnitrosamine|Dimethylnitrosamine|epigallocatechin gallate|Estradiol|Ethanol|Ethinyl Estradiol|Genistein|Hexachlorocyclohexane|Lipopolysaccharides|Norethind…	79.48	230
GAPDH	2597	Carcinoma, Hepatocellular	MESH:D006528	marker/mechanism	2,4-dinitrotoluene|2,6-dinitrotoluene|Acetaminophen|Acetylcysteine|Acrylamide|Aflatoxin B1|alpha-hexachlorocyclohexane|Arsenic Trioxide|Ascorbic Acid|Benzbromarone|Benzo(a)pyrene|cadmium telluride|Carbon Tetrachloride|Chlorodiphenyl (54% Chlorine)|Cisplatin|Clofibrate|Copper|Decitabine|Dexamethasone|Diethylnitrosamine|Docetaxel|Doxorubicin|Estradiol|Ethanol|Ethinyl Estradiol|Ethionine|Flavonoids|…	79.44	257
MAT1A	4143	Carcinoma, Hepatocellular	MESH:D006528	marker/mechanism	1,4-bis(2-(3,5-dichloropyridyloxy))benzene|2,4-dinitrotoluene|2,6-dinitrotoluene|2-Acetylaminofluorene|Acetaminophen|Aflatoxin B1|Arsenic|benz(a)anthracene|Benzo(a)pyrene|benzo(b)fluoranthene|Carbon Tetrachloride|Choline|Cisplatin|Dexamethasone|Dichloroacetic Acid|Diethylnitrosamine|Dimethylnitrosamine|Estradiol|Ethinyl Estradiol|Methionine|Methotrexate|N-nitrosomorpholine|perfluorooctanoic acid|…	79.41	237
MAPT	4137	Carcinoma, Hepatocellular	MESH:D006528	marker/mechanism	Acetaminophen|Acetylcysteine|Acrylamide|Aflatoxin B1|Arsenic|Ascorbic Acid|Azacitidine|Benzo(a)pyrene|Carbon Tetrachloride|Cholesterol|Colchicine|Copper|Cyclophosphamide|Daunorubicin|Diethylhexyl Phthalate|Diethylnitrosamine|Diethylstilbestrol|Doxorubicin|Estradiol|Ethanol|Ethinyl Estradiol|Fenretinide|Fluorouracil|Genistein|Griseofulvin|Norethindrone|Paclitaxel|Pentachlorophenol|perfluorooctanoi…	79.3	251
FABP5	2171	Carcinoma, Hepatocellular	MESH:D006528	marker/mechanism	1,4-bis(2-(3,5-dichloropyridyloxy))benzene|2,4-dinitrotoluene|4,4'-diaminodiphenylmethane|Acetaminophen|Aflatoxin B1|Arsenic Trioxide|Benzo(a)pyrene|benzo(b)fluoranthene|beta-hexachlorocyclohexane|Cisplatin|Clofibrate|Copper|Decitabine|Dexamethasone|Dichloroacetic Acid|Diethylhexyl Phthalate|Diethylnitrosamine|Diethylstilbestrol|Doxorubicin|Estradiol|Ethanol|Ethinyl Estradiol|Indomethacin|nimesul…	79.1	247
MCM10	55388	Carcinoma, Hepatocellular	MESH:D006528	marker/mechanism	1,4-bis(2-(3,5-dichloropyridyloxy))benzene|Acetaminophen|Acrylamide|Aflatoxin B1|Azathioprine|Benzo(a)pyrene|Carbon Tetrachloride|Cisplatin|Colchicine|Copper|Dichloroacetic Acid|Diethylhexyl Phthalate|Diethylnitrosamine|Doxorubicin|Estradiol|Ethanol|Ethinyl Estradiol|Fluorouracil|Genistein|Methotrexate|Phenobarbital|pirinixic acid|Quercetin|Resveratrol|sodium arsenite|Sodium Selenite|Tetrachlorod…	78.77	241
SOCS2	8835	Carcinoma, Hepatocellular	MESH:D006528	marker/mechanism	1,4-bis(2-(3,5-dichloropyridyloxy))benzene|4,4'-diaminodiphenylmethane|Acetaminophen|Acrylamide|Aflatoxin B1|Benzo(a)pyrene|Choline|Cisplatin|Copper|Decitabine|Dexamethasone|Diethylhexyl Phthalate|Diethylnitrosamine|Diethylstilbestrol|Dimethylnitrosamine|Doxorubicin|Estradiol|Ethanol|Ethinyl Estradiol|Fenretinide|Hexachlorocyclohexane|Lipopolysaccharides|Methionine|perfluorooctanoic acid|Phenobar…	78.66	248
RCAN1	1827	Carcinoma, Hepatocellular	MESH:D006528	marker/mechanism	2,4-dinitrotoluene|Acetaminophen|Aflatoxin B1|Ascorbic Acid|Benzo(a)pyrene|Carbon Tetrachloride|Choline|Cisplatin|Decitabine|Dexamethasone|Dichloroacetic Acid|Diethylnitrosamine|Doxorubicin|Estradiol|Ethinyl Estradiol|Ethylnitrosourea|Methionine|Methotrexate|N-(2-(1,1'-bicyclopropyl)-2-ylphenyl)-3-(difluoromethyl)-1-methyl-1H-pyrazole-4-carboxamide|nimesulide|Phenobarbital|pirinixic acid|Resverat…	78.15	240
INMT	11185	Carcinoma, Hepatocellular	MESH:D006528	marker/mechanism	1,4-bis(2-(3,5-dichloropyridyloxy))benzene|4,4'-diaminodiphenylmethane|Acetaminophen|Aflatoxin B1|Benzo(a)pyrene|Carbon Tetrachloride|Clofibrate|Copper|Dexamethasone|Dichloroacetic Acid|Diethylhexyl Phthalate|Diethylstilbestrol|Dimethylnitrosamine|Estradiol|Ethanol|Ethinyl Estradiol|Fenretinide|Lipopolysaccharides|N-nitrosomorpholine|perfluorooctanoic acid|Phenobarbital|Pioglitazone|pirinixic aci…	77.79	138
SLC22A1	6580	Carcinoma, Hepatocellular	MESH:D006528	marker/mechanism	1,4-bis(2-(3,5-dichloropyridyloxy))benzene|2-amino-3,4-dimethylimidazo(4,5-f)quinoline|3-amino-1,4-dimethyl-5H-pyrido(4,3-b)indole|3-amino-1-methyl-5H-pyrido(4,3-b)indole|4,4'-diaminodiphenylmethane|Acetaminophen|Acrylamide|Aflatoxin B1|Benzbromarone|Benzo(a)pyrene|Carbon Tetrachloride|Cimetidine|Clofibrate|Dexamethasone|Diethylstilbestrol|Doxorubicin|Drugs, Chinese Herbal|Estradiol|Ethinyl Estra…	77.48	130
ESM1	11082	Carcinoma, Hepatocellular	MESH:D006528	marker/mechanism	1-nitropyrene|Acetaminophen|Acrylamide|Aflatoxin B1|Arsenic|Benzo(a)pyrene|benzo(b)fluoranthene|Cholesterol|Cisplatin|Colchicine|Diethylnitrosamine|Doxorubicin|Estradiol|Ethanol|Ethinyl Estradiol|Genistein|Lipopolysaccharides|Phenobarbital|pirinixic acid|Quercetin|sodium arsenite|Tamoxifen|Tetrachlorodibenzodioxin|Tetrachloroethylene|Tetradecanoylphorbol Acetate|Thioacetamide|Tretinoin	77.19	232
CHAF1B	8208	Carcinoma, Hepatocellular	MESH:D006528	marker/mechanism	1,4-bis(2-(3,5-dichloropyridyloxy))benzene|4,4'-diaminodiphenylmethane|Acetaminophen|Acrylamide|Aflatoxin B1|Ascorbic Acid|Benzo(a)pyrene|benzo(b)fluoranthene|Carbon Tetrachloride|Cisplatin|Clofibrate|Colchicine|Copper|Dexamethasone|Diethylnitrosamine|Estradiol|Ethinyl Estradiol|Fenretinide|Indomethacin|N-(2-(1,1'-bicyclopropyl)-2-ylphenyl)-3-(difluoromethyl)-1-methyl-1H-pyrazole-4-carboxamide|Ph…	77.07	216
DTL	51514	Carcinoma, Hepatocellular	MESH:D006528	marker/mechanism	1,4-bis(2-(3,5-dichloropyridyloxy))benzene|Acetaminophen|Acrylamide|Aflatoxin B1|Arsenic Trioxide|Azathioprine|benz(a)anthracene|Benzo(a)pyrene|benzo(b)fluoranthene|beta-hexachlorocyclohexane|Carbon Tetrachloride|Cisplatin|Copper|Dichloroacetic Acid|Diethylhexyl Phthalate|Doxorubicin|Estradiol|Ethanol|Ethinyl Estradiol|Genistein|Lipopolysaccharides|Methyltestosterone|Phenobarbital|pirinixic acid|…	77.07	135
SKP2	6502	Carcinoma, Hepatocellular	MESH:D006528	marker/mechanism	1,4-bis(2-(3,5-dichloropyridyloxy))benzene|Acetaminophen|Aflatoxin B1|Arsenic|Arsenic Trioxide|Azathioprine|Benzo(a)pyrene|Bortezomib|Butylated Hydroxyanisole|Cisplatin|Copper|Doxorubicin|Drugs, Chinese Herbal|epigallocatechin gallate|Estradiol|Ethinyl Estradiol|Indomethacin|Irinotecan|Methotrexate|Methyltestosterone|Paclitaxel|Phenobarbital|Plant Extracts|Quercetin|Resveratrol|Sirolimus|sodium a…	76.76	139
ANLN	54443	Carcinoma, Hepatocellular	MESH:D006528	marker/mechanism	1,4-bis(2-(3,5-dichloropyridyloxy))benzene|2-amino-3,8-dimethylimidazo(4,5-f)quinoxaline|4,4'-diaminodiphenylmethane|Acetaminophen|Aflatoxin B1|Azathioprine|Benzo(a)pyrene|benzo(b)fluoranthene|Carbon Tetrachloride|Cisplatin|Copper|Dichloroacetic Acid|Diethylnitrosamine|Doxorubicin|Estradiol|Ethanol|Ethinyl Estradiol|Fluorouracil|Methotrexate|Pentachlorophenol|Phenobarbital|Quercetin|Resveratrol|s…	76.72	254
CDKN2C	1031	Carcinoma, Hepatocellular	MESH:D006528	marker/mechanism	2-Acetylaminofluorene|Acetaminophen|Aflatoxin B1|Arsenic Trioxide|Benzo(a)pyrene|benzo(b)fluoranthene|Carbon Tetrachloride|Choline|Cisplatin|Copper|Dexamethasone|Diethylhexyl Phthalate|Diethylnitrosamine|Doxorubicin|Drugs, Chinese Herbal|Estradiol|Ethinyl Estradiol|Ethylnitrosourea|Fluorouracil|Genistein|Methionine|nimesulide|Paclitaxel|Phenobarbital|pirinixic acid|Quercetin|Resveratrol|sodium ar…	76.54	250
TRIM24	8805	Carcinoma, Hepatocellular	MESH:D006528	marker/mechanism	2,6-dinitrotoluene|4,4'-diaminodiphenylmethane|Acetaminophen|Aflatoxin B1|Arsenic|Arsenic Trioxide|Benzo(a)pyrene|Choline|Cisplatin|Dexamethasone|Dichloroacetic Acid|Doxorubicin|epigallocatechin gallate|Indomethacin|Methionine|Methotrexate|Methyltestosterone|Pentachlorophenol|Phenobarbital|pirinixic acid|Quercetin|sodium arsenite|Sodium Selenite|Tetrachlorodibenzodioxin|Tetradecanoylphorbol Aceta…	76.33	111
FBP1	2203	Carcinoma, Hepatocellular	MESH:D006528	marker/mechanism	1,4-bis(2-(3,5-dichloropyridyloxy))benzene|2,4-dinitrotoluene|2,6-dinitrotoluene|Acetaminophen|Aflatoxin B1|Arsenic Trioxide|Ascorbic Acid|Benzbromarone|Benzo(a)pyrene|Cisplatin|Clofibrate|Decitabine|epigallocatechin gallate|Estradiol|Ethinyl Estradiol|Ethionine|Fenretinide|Flavonoids|N-nitrosomorpholine|perfluorooctanoic acid|pirinixic acid|Plant Extracts|Plant Preparations|Quercetin|Resveratrol…	75.96	106
ATG7	10533	Carcinoma, Hepatocellular	MESH:D006528	marker/mechanism	1,4-bis(2-(3,5-dichloropyridyloxy))benzene|1-nitropyrene|2,4-dinitrotoluene|Acetaminophen|Acetylcysteine|Aflatoxin B1|Arsenic|Arsenic Trioxide|Benzo(a)pyrene|Biological Products|Cisplatin|Clofibrate|Dexamethasone|Diethylhexyl Phthalate|Doxorubicin|Ethanol|Ethinyl Estradiol|Fenretinide|Gefitinib|Indomethacin|Lipopolysaccharides|N-(2-(1,1'-bicyclopropyl)-2-ylphenyl)-3-(difluoromethyl)-1-methyl-1H-p…	75.47	143
TRIP13	9319	Carcinoma, Hepatocellular	MESH:D006528	marker/mechanism	1,4-bis(2-(3,5-dichloropyridyloxy))benzene|Acetaminophen|Aflatoxin B1|Arsenic Trioxide|Azathioprine|Benzo(a)pyrene|benzo(b)fluoranthene|Carbon Tetrachloride|Cisplatin|Copper|Diethylnitrosamine|epigallocatechin gallate|Estradiol|Ethinyl Estradiol|Genistein|Indomethacin|Methotrexate|Methyltestosterone|Niclosamide|perfluorooctanoic acid|Phenobarbital|pirinixic acid|Quercetin|Resveratrol|sodium arsen…	75.17	235
AADAT	51166	Carcinoma, Hepatocellular	MESH:D006528	marker/mechanism	2,6-dinitrotoluene|4,4'-diaminodiphenylmethane|Acetaminophen|Aflatoxin B1|Benzo(a)pyrene|Carbon Tetrachloride|Chlorodiphenyl (54% Chlorine)|Clofibrate|Copper|Dexamethasone|Diethylnitrosamine|Dimethylnitrosamine|Doxorubicin|Estradiol|Ethanol|Ethinyl Estradiol|N-nitrosomorpholine|Phenobarbital|pirinixic acid|Quercetin|sodium arsenite|Sulfasalazine|Tetrachlorodibenzodioxin|Tetradecanoylphorbol Aceta…	75.08	226
ATM	472	Carcinoma, Hepatocellular	MESH:D006528	marker/mechanism	Acetaminophen|Acetylcysteine|Acrylamide|Arsenic|Arsenic Trioxide|Ascorbic Acid|Benzo(a)pyrene|Bleomycin|Bortezomib|Butylated Hydroxyanisole|Cisplatin|Curcumin|cyproconazole|Daunorubicin|Decitabine|deguelin|Diethylhexyl Phthalate|Diethylnitrosamine|Doxorubicin|Drugs, Chinese Herbal|Estradiol|Ethanol|Genistein|Hydroxyurea|Irinotecan|Iron|Methotrexate|Methylnitronitrosoguanidine|Nitric Oxide|Phenoba…	74.76	232
HAO2	51179	Carcinoma, Hepatocellular	MESH:D006528	marker/mechanism	1,4-bis(2-(3,5-dichloropyridyloxy))benzene|4,4'-diaminodiphenylmethane|Acetaminophen|Aflatoxin B1|Arsenic|Benzbromarone|Benzo(a)pyrene|Clofibrate|Dichloroacetic Acid|Diethylnitrosamine|Dimethylnitrosamine|Doxorubicin|Estradiol|Ethanol|Ethinyl Estradiol|Ethionine|Genistein|Phenobarbital|pirinixic acid|Quercetin|Resveratrol|sodium arsenite|Streptozocin|Tamoxifen|Tetrachlorodibenzodioxin|Thioacetami…	74.73	232
ASF1B	55723	Carcinoma, Hepatocellular	MESH:D006528	marker/mechanism	1,4-bis(2-(3,5-dichloropyridyloxy))benzene|Acetaminophen|Acrylamide|Aflatoxin B1|Benzo(a)pyrene|benzo(b)fluoranthene|Carbon Tetrachloride|Choline|Cisplatin|Clofibrate|Copper|Diethylnitrosamine|Doxorubicin|Ethinyl Estradiol|Fenretinide|Methionine|Methotrexate|Niclosamide|Phenobarbital|pirinixic acid|Quercetin|Resveratrol|sodium arsenite|Tamoxifen|Tetrachlorodibenzodioxin|Topotecan|Tretinoin|Trichl…	74.69	241
EZH2	2146	Carcinoma, Hepatocellular	MESH:D006528	marker/mechanism	Acetaminophen|Acetylcysteine|Acrylamide|Aflatoxin B1|Arsenic|Arsenic Trioxide|Ascorbic Acid|Azathioprine|Benzo(a)pyrene|Carbon Tetrachloride|Cisplatin|Copper|Dexamethasone|Diethylnitrosamine|Diethylstilbestrol|Doxorubicin|Estradiol|Ethanol|Ethinyl Estradiol|Genistein|Methotrexate|Methyltestosterone|Pentachlorophenol|pyrazolanthrone|Resveratrol|sodium arsenite|Tamoxifen|Tetrachlorodibenzodioxin|Te…	74.67	253
ASPM	259266	Carcinoma, Hepatocellular	MESH:D006528	marker/mechanism	1,4-bis(2-(3,5-dichloropyridyloxy))benzene|2,6-dinitrotoluene|4,4'-diaminodiphenylmethane|Acetaminophen|Aflatoxin B1|Arsenic Trioxide|Azathioprine|Benzo(a)pyrene|benzo(b)fluoranthene|Carbon Tetrachloride|Cisplatin|Diethylnitrosamine|Doxorubicin|epigallocatechin gallate|Estradiol|Ethanol|Ethinyl Estradiol|Genistein|Methotrexate|Paclitaxel|Phenobarbital|pirinixic acid|Quercetin|Resveratrol|sodium a…	74.42	245
NCAPG	64151	Carcinoma, Hepatocellular	MESH:D006528	marker/mechanism	1,4-bis(2-(3,5-dichloropyridyloxy))benzene|Acetaminophen|Aflatoxin B1|Azathioprine|Benzo(a)pyrene|Carbon Tetrachloride|Copper|Dexamethasone|Dichloroacetic Acid|Doxorubicin|Estradiol|Ethinyl Estradiol|Fluorouracil|Genistein|Lipopolysaccharides|Paclitaxel|perfluorooctanoic acid|Phenobarbital|pirinixic acid|Plant Extracts|Quercetin|Resveratrol|sodium arsenite|Sodium Selenite|Tetrachlorodibenzodioxin…	74.36	131
ECM1	1893	Carcinoma, Hepatocellular	MESH:D006528	marker/mechanism	2-nitrotoluene|4,4'-diaminodiphenylmethane|Acetaminophen|Acrylamide|Aflatoxin B1|Arsenic Trioxide|benz(a)anthracene|Benzo(a)pyrene|benzo(b)fluoranthene|Carbon Tetrachloride|Cisplatin|Diethylnitrosamine|Diethylstilbestrol|Doxorubicin|epigallocatechin gallate|Estradiol|Ethinyl Estradiol|Fenretinide|Paclitaxel|Pentachlorophenol|Phenobarbital|pirinixic acid|Resveratrol|Tetrachlorodibenzodioxin|Tetrad…	74.29	234
GNMT	27232	Carcinoma, Hepatocellular	MESH:D006528	marker/mechanism	1,4-bis(2-(3,5-dichloropyridyloxy))benzene|2-amino-3,8-dimethylimidazo(4,5-f)quinoxaline|Acetaminophen|Aflatoxin B1|Benzo(a)pyrene|Butylated Hydroxytoluene|Carbon Tetrachloride|Chlorodiphenyl (54% Chlorine)|Cisplatin|Clofibrate|Copper|Dexamethasone|Diethylnitrosamine|Dimethylnitrosamine|Estradiol|Ethinyl Estradiol|Fenretinide|Flavonoids|Gefitinib|Genistein|nimesulide|Phenobarbital|pirinixic acid|…	74.12	223
IL1RAP	3556	Carcinoma, Hepatocellular	MESH:D006528	marker/mechanism	2,4-dinitrotoluene|2,6-dinitrotoluene|Acetaminophen|Aflatoxin B1|Arsenic|Benzo(a)pyrene|Carbon Tetrachloride|ciprofibrate|Cisplatin|cyproconazole|Dexamethasone|Diethylhexyl Phthalate|Diethylnitrosamine|Doxorubicin|Ethanol|Fenretinide|Flavonoids|Indomethacin|Lipopolysaccharides|N-(2-(1,1'-bicyclopropyl)-2-ylphenyl)-3-(difluoromethyl)-1-methyl-1H-pyrazole-4-carboxamide|Phenobarbital|pirinixic acid|…	73.73	224
TFPI2	7980	Carcinoma, Hepatocellular	MESH:D006528	marker/mechanism	Acetaminophen|Acrylamide|Aflatoxin B1|benz(a)anthracene|Benzo(a)pyrene|Carbon Tetrachloride|Cisplatin|Clofibrate|Colchicine|Copper|Decitabine|Dexamethasone|Diethylhexyl Phthalate|Dimethylnitrosamine|Doxorubicin|Estradiol|Fenretinide|Indomethacin|Methotrexate|Paclitaxel|Phenobarbital|pirinixic acid|Prednisolone|Quercetin|Resveratrol|sodium arsenite|Temozolomide|Tetrachlorodibenzodioxin|Topotecan|T…	73.69	122
CCNF	899	Carcinoma, Hepatocellular	MESH:D006528	marker/mechanism	1,4-bis(2-(3,5-dichloropyridyloxy))benzene|Acetaminophen|Aflatoxin B1|Arsenic Trioxide|Benzo(a)pyrene|benzo(b)fluoranthene|Bortezomib|Butylated Hydroxytoluene|Carbon Tetrachloride|Cisplatin|Copper|Decitabine|Diethylnitrosamine|epigallocatechin gallate|Ethinyl Estradiol|Fenretinide|Fluorouracil|Indomethacin|Irinotecan|Paclitaxel|Phenobarbital|pirinixic acid|Quercetin|Resveratrol|sodium arsenite|ta…	73.59	245
A2M	2	Carcinoma, Hepatocellular	MESH:D006528	marker/mechanism	1,4-bis(2-(3,5-dichloropyridyloxy))benzene|2,4-dinitrotoluene|2,6-dinitrotoluene|4,4'-diaminodiphenylmethane|Acetaminophen|Aflatoxin B1|Arsenic Trioxide|Benzo(a)pyrene|Cisplatin|Clofibrate|Copper|Dexamethasone|Dichloroacetic Acid|Diethylnitrosamine|Dimethylnitrosamine|Doxorubicin|Ethinyl Estradiol|gemcitabine|Indomethacin|Irinotecan|Lipopolysaccharides|perfluorodecanoic acid|perfluoro-n-nonanoic …	73.43	231
ECT2	1894	Carcinoma, Hepatocellular	MESH:D006528	marker/mechanism	1,4-bis(2-(3,5-dichloropyridyloxy))benzene|4,4'-diaminodiphenylmethane|Acetaminophen|Aflatoxin B1|Benzo(a)pyrene|benzo(b)fluoranthene|Carbon Tetrachloride|Cisplatin|Copper|Dichloroacetic Acid|Diethylnitrosamine|Dimethylnitrosamine|Doxorubicin|Drugs, Chinese Herbal|epigallocatechin gallate|Estradiol|Fluorouracil|Genistein|Methyltestosterone|Phenobarbital|pirinixic acid|Quercetin|Resveratrol|sodium…	73.12	242
NUF2	83540	Carcinoma, Hepatocellular	MESH:D006528	marker/mechanism	1,4-bis(2-(3,5-dichloropyridyloxy))benzene|Acetaminophen|Aflatoxin B1|Azathioprine|Benzo(a)pyrene|benzo(b)fluoranthene|Carbon Tetrachloride|Chlorodiphenyl (54% Chlorine)|Choline|Dichloroacetic Acid|Doxorubicin|epigallocatechin gallate|Estradiol|Ethinyl Estradiol|Methionine|Methotrexate|Methyltestosterone|Phenobarbital|pirinixic acid|Plant Extracts|Quercetin|Resveratrol|sodium arsenite|Sodium Sele…	72.8	119
GLI1	2735	Carcinoma, Hepatocellular	MESH:D006528	marker/mechanism	Aflatoxin B1|Arsenic|Arsenic Trioxide|Cisplatin|Copper|Curcumin|Decitabine|Dexamethasone|Diethylhexyl Phthalate|Diethylnitrosamine|Diethylstilbestrol|epigallocatechin gallate|Estradiol|Ethinyl Estradiol|Ethylnitrosourea|Fluorouracil|Genistein|Lipopolysaccharides|Melitten|Methyltestosterone|Plant Extracts|Plant Preparations|Quercetin|Resveratrol|sodium arsenite|Tamoxifen|Tetrachlorodibenzodioxin|T…	72.66	247
NNMT	4837	Carcinoma, Hepatocellular	MESH:D006528	marker/mechanism	1,4-bis(2-(3,5-dichloropyridyloxy))benzene|2,4-dinitrotoluene|Acetaminophen|Aflatoxin B1|Benzo(a)pyrene|Carbon Tetrachloride|Clofibrate|Copper|Diethylhexyl Phthalate|Diethylnitrosamine|Doxorubicin|epigallocatechin gallate|Estradiol|Ethinyl Estradiol|gemcitabine|Lipopolysaccharides|N-(2-(1,1'-bicyclopropyl)-2-ylphenyl)-3-(difluoromethyl)-1-methyl-1H-pyrazole-4-carboxamide|N-nitrosomorpholine|Penta…	72.66	238
HMMR	3161	Carcinoma, Hepatocellular	MESH:D006528	marker/mechanism	1,4-bis(2-(3,5-dichloropyridyloxy))benzene|2,6-dinitrotoluene|4,4'-diaminodiphenylmethane|Acetaminophen|Aflatoxin B1|Azathioprine|Benzo(a)pyrene|Carbon Tetrachloride|Cisplatin|Copper|Dichloroacetic Acid|Doxorubicin|epigallocatechin gallate|Estradiol|Ethinyl Estradiol|Flavonoids|Fluorouracil|Irinotecan|Methotrexate|Niclosamide|Paclitaxel|Phenobarbital|pirinixic acid|Quercetin|Resveratrol|sodium ar…	72.29	137
EGR2	1959	Carcinoma, Hepatocellular	MESH:D006528	marker/mechanism	Acetaminophen|Acetylcysteine|Aflatoxin B1|Arsenic|Arsenic Trioxide|Azacitidine|Azathioprine|Benzo(a)pyrene|Bleomycin|Bortezomib|Carbon Tetrachloride|Choline|Cisplatin|Clofibrate|Copper|Cyclophosphamide|cyproconazole|Dexamethasone|Dichloroacetic Acid|Diethylstilbestrol|Doxorubicin|Estradiol|Ethanol|Ethinyl Estradiol|Lipopolysaccharides|Methionine|Phenobarbital|pirinixic acid|Quercetin|sodium arsen…	72	144
NDC80	10403	Carcinoma, Hepatocellular	MESH:D006528	marker/mechanism	1,4-bis(2-(3,5-dichloropyridyloxy))benzene|Acetaminophen|Acrylamide|Aflatoxin B1|Arsenic|Azathioprine|benz(a)anthracene|Benzo(a)pyrene|Carbon Tetrachloride|Cisplatin|Copper|Dexamethasone|Doxorubicin|epigallocatechin gallate|Estradiol|Genistein|Indomethacin|Methotrexate|Methyltestosterone|Quercetin|Resveratrol|Sirolimus|sodium arsenite|Sodium Selenite|Tetrachlorodibenzodioxin|Tetradecanoylphorbol …	71.9	86
PDGFB	5155	Carcinoma, Hepatocellular	MESH:D006528	marker/mechanism	Acetylcysteine|Acrylamide|Aflatoxin B1|Benzo(a)pyrene|Carbon Tetrachloride|Choline|Cisplatin|Curcumin|Decitabine|Dimethylnitrosamine|Doxorubicin|Drugs, Chinese Herbal|Estradiol|Ethanol|Ethinyl Estradiol|Fenretinide|Genistein|Lipopolysaccharides|Methionine|Methotrexate|Methylnitronitrosoguanidine|Phenobarbital|Phenytoin|Pioglitazone|Plant Extracts|Quercetin|Resveratrol|Sirolimus|sodium arsenite|Te…	71.81	123
CDH13	1012	Carcinoma, Hepatocellular	MESH:D006528	marker/mechanism	1-nitropyrene|2-Acetylaminofluorene|Acetaminophen|Acetylcysteine|Acrylamide|Aflatoxin B1|alpha-naphthoflavone|Androgens|Ascorbic Acid|Benzo(a)pyrene|Carbon Tetrachloride|Copper|Daunorubicin|Decitabine|Dexamethasone|Diethylhexyl Phthalate|Diethylnitrosamine|Doxorubicin|epigallocatechin gallate|Estradiol|Ethinyl Estradiol|Fenretinide|Lipopolysaccharides|sodium arsenite|Temozolomide|Tetrachlorodiben…	71.68	206
CD163	9332	Carcinoma, Hepatocellular	MESH:D006528	marker/mechanism	4,4'-diaminodiphenylmethane|Acetaminophen|Aflatoxin B1|Benzo(a)pyrene|Carbon Tetrachloride|Choline|Copper|deguelin|Dexamethasone|Diethylnitrosamine|Estradiol|Ethanol|Fenretinide|Indomethacin|Irinotecan|Lipopolysaccharides|Paclitaxel|perfluorooctanoic acid|Phenobarbital|pirinixic acid|Resveratrol|sodium arsenite|Streptozocin|sulforafan|Tamoxifen|Topotecan	71.59	224
ACSL4	2182	Carcinoma, Hepatocellular	MESH:D006528	marker/mechanism	2,4-dinitrotoluene|4,4'-diaminodiphenylmethane|Acetaminophen|Aflatoxin B1|Ascorbic Acid|Benzo(a)pyrene|Bezafibrate|Carbon Tetrachloride|Choline|Cisplatin|Clofibrate|Copper|Dexamethasone|Dichloroacetic Acid|Diethylnitrosamine|Doxorubicin|Estradiol|Ethinyl Estradiol|Fenretinide|Methionine|Methotrexate|nimesulide|perfluorooctanoic acid|Phenobarbital|pirinixic acid|Plant Extracts|Resveratrol|Tetrachl…	71.48	229
CEP55	55165	Carcinoma, Hepatocellular	MESH:D006528	marker/mechanism	1,4-bis(2-(3,5-dichloropyridyloxy))benzene|2-amino-3,8-dimethylimidazo(4,5-f)quinoxaline|Acetaminophen|Aflatoxin B1|Arsenic Trioxide|Azathioprine|Benzo(a)pyrene|Carbon Tetrachloride|Choline|Dichloroacetic Acid|Diethylhexyl Phthalate|Diethylnitrosamine|Doxorubicin|Estradiol|Ethanol|Fluorouracil|Methionine|Phenobarbital|pirinixic acid|Quercetin|Resveratrol|sodium arsenite|Tetrachlorodibenzodioxin|T…	70.99	237
ERP29	10961	Carcinoma, Hepatocellular	MESH:D006528	marker/mechanism	2,4-dinitrotoluene|Acetaminophen|Arsenic|Benzbromarone|Clofibrate|Dexamethasone|Diethylhexyl Phthalate|Diethylnitrosamine|Doxorubicin|Drugs, Chinese Herbal|epigallocatechin gallate|Ethanol|Ethinyl Estradiol|Ethionine|Fluorouracil|Indomethacin|Methotrexate|Nafenopin|N-nitrosomorpholine|perfluorooctanoic acid|Phenobarbital|pirinixic acid|Quercetin|Tetrachlorodibenzodioxin|Tetrachloroethylene|Tetrad…	70.74	226
TCF19	6941	Carcinoma, Hepatocellular	MESH:D006528	marker/mechanism	1,4-bis(2-(3,5-dichloropyridyloxy))benzene|Acetaminophen|Aflatoxin B1|Arsenic Trioxide|Ascorbic Acid|Azathioprine|benz(a)anthracene|Benzo(a)pyrene|benzo(b)fluoranthene|Bortezomib|Carbon Tetrachloride|Cisplatin|Copper|Dexamethasone|Diethylnitrosamine|Estradiol|Ethinyl Estradiol|Fenretinide|Fluorouracil|Phenobarbital|pirinixic acid|Quercetin|Resveratrol|Sirolimus|sodium arsenite|Tetrachlorodibenzod…	70.74	236
HAMP	57817	Carcinoma, Hepatocellular	MESH:D006528	marker/mechanism	1,4-bis(2-(3,5-dichloropyridyloxy))benzene|2,6-dinitrotoluene|2-Acetylaminofluorene|Acetaminophen|Acrylamide|Aflatoxin B1|Benzo(a)pyrene|benzo(b)fluoranthene|Carbon Tetrachloride|Cisplatin|Copper|Curcumin|Diethylnitrosamine|Doxorubicin|Estradiol|Ethanol|Genistein|Hexachlorocyclohexane|Iron|Lipopolysaccharides|Niclosamide|perfluorooctanoic acid|pirinixic acid|Plant Extracts|Plant Preparations|Quer…	70.67	231
MVK	4598	Carcinoma, Hepatocellular	MESH:D006528	marker/mechanism	1,4-bis(2-(3,5-dichloropyridyloxy))benzene|4,4'-diaminodiphenylmethane|Acetaminophen|Acrylamide|Aflatoxin B1|Benzo(a)pyrene|Chlorodiphenyl (54% Chlorine)|Cholesterol|Cisplatin|Curcumin|cyproconazole|Dexamethasone|Dichloroacetic Acid|Diethylhexyl Phthalate|epigallocatechin gallate|Estradiol|Ethanol|Ethinyl Estradiol|Fenretinide|Flavonoids|Lipopolysaccharides|perfluorooctanoic acid|pirinixic acid|s…	70.47	74
MECP2	4204	Carcinoma, Hepatocellular	MESH:D006528	marker/mechanism	4,4'-diaminodiphenylmethane|Acetaminophen|Aflatoxin B1|Arsenic Trioxide|Azacitidine|Benzo(a)pyrene|Bleomycin|Carbon Tetrachloride|Curcumin|Decitabine|Diethylhexyl Phthalate|Diethylnitrosamine|Doxorubicin|Estradiol|Ethanol|Ethinyl Estradiol|Ethylnitrosourea|Fenretinide|Flavonoids|Genistein|Melitten|Methionine|Phenobarbital|pyrimidin-2-one beta-ribofuranoside|Resveratrol|sodium arsenite|Tetrachloro…	70.43	231
PHB	5245	Carcinoma, Hepatocellular	MESH:D006528	marker/mechanism	2,4-dinitrotoluene|4,4'-diaminodiphenylmethane|Acetaminophen|Aflatoxin B1|Arsenic Trioxide|Choline|Clofibrate|Copper|Curcumin|Dexamethasone|Diethylnitrosamine|Doxorubicin|Estradiol|Ethanol|Ethinyl Estradiol|Genistein|Indomethacin|Methionine|nimesulide|Pentachlorophenol|perfluorooctanoic acid|Phenobarbital|pirinixic acid|sodium arsenite|Streptozocin|Tamoxifen|Tetrachlorodibenzodioxin|Tetradecanoyl…	70.12	238
ETFA	2108	Carcinoma, Hepatocellular	MESH:D006528	marker/mechanism	2,6-dinitrotoluene|Acetaminophen|Aflatoxin B1|Arsenic Trioxide|Benzo(a)pyrene|Chlorodiphenyl (54% Chlorine)|Choline|Clofibrate|cyproconazole|Dexamethasone|Doxorubicin|Ethanol|Indomethacin|Methionine|N-nitrosomorpholine|perfluorooctanoic acid|pirinixic acid|Plant Extracts|pyrazolanthrone|Resveratrol|sodium arsenite|Streptozocin|sulforafan|Tetrachlorodibenzodioxin|Tetradecanoylphorbol Acetate|Trien…	69.7	94
KIF11	3832	Carcinoma, Hepatocellular	MESH:D006528	marker/mechanism	1,4-bis(2-(3,5-dichloropyridyloxy))benzene|2-Acetylaminofluorene|4,4'-diaminodiphenylmethane|Acetaminophen|Aflatoxin B1|Azathioprine|Benzo(a)pyrene|beta Carotene|Carbon Tetrachloride|Cisplatin|Copper|Cyproterone Acetate|Decitabine|Diethylhexyl Phthalate|Diethylnitrosamine|Doxorubicin|Estradiol|Ethinyl Estradiol|Genistein|Methotrexate|Niclosamide|Phenobarbital|Quercetin|Resveratrol|sodium arsenite…	69.68	232
THY1	7070	Carcinoma, Hepatocellular	MESH:D006528	marker/mechanism	2-Acetylaminofluorene|Aflatoxin B1|Arsenic|Benzo(a)pyrene|Bortezomib|Carbon Tetrachloride|Copper|Curcumin|Cyclophosphamide|Dexamethasone|Diethylhexyl Phthalate|Diethylnitrosamine|Diethylstilbestrol|Doxorubicin|Estradiol|Ethanol|Ethinyl Estradiol|Fenretinide|Genistein|Irinotecan|Nitroglycerin|Paclitaxel|Pentachlorophenol|Resveratrol|sodium arsenite|Tetrachlorodibenzodioxin|Tetradecanoylphorbol Ace…	69.65	219
E2F8	79733	Carcinoma, Hepatocellular	MESH:D006528	marker/mechanism	Acetaminophen|Aflatoxin B1|Arsenic|Arsenic Trioxide|Azathioprine|Benzo(a)pyrene|benzo(b)fluoranthene|Cisplatin|Clofibrate|Copper|Dichloroacetic Acid|Diethylstilbestrol|Doxorubicin|Estradiol|Ethinyl Estradiol|Fluorouracil|Iron|Lipopolysaccharides|Methotrexate|Niclosamide|Phenobarbital|pirinixic acid|Resveratrol|sodium arsenite|Tamoxifen|Tetrachlorodibenzodioxin|Thioacetamide|Topotecan|Tretinoin|Tr…	69.44	157
TH	7054	Carcinoma, Hepatocellular	MESH:D006528	marker/mechanism	3-amino-1,4-dimethyl-5H-pyrido(4,3-b)indole|3-amino-1-methyl-5H-pyrido(4,3-b)indole|Acetylcysteine|Acrylamide|Aflatoxin B1|aroclor 1260|Arsenic|Arsenic Trioxide|Ascorbic Acid|Benzo(a)pyrene|Chlorodiphenyl (54% Chlorine)|Cisplatin|Curcumin|Decitabine|Dexamethasone|Diethylhexyl Phthalate|Diethylnitrosamine|Diethylstilbestrol|Drugs, Chinese Herbal|epigallocatechin gallate|Estradiol|Estrogens|Ethanol…	68.73	248
PYGL	5836	Carcinoma, Hepatocellular	MESH:D006528	marker/mechanism	1,4-bis(2-(3,5-dichloropyridyloxy))benzene|2,4-dinitrotoluene|2,6-dinitrotoluene|4,4'-diaminodiphenylmethane|Acetaminophen|Acetylcysteine|Arsenic Trioxide|Benzbromarone|Benzo(a)pyrene|Carbon Tetrachloride|Cisplatin|Clofibrate|Dexamethasone|Diethylhexyl Phthalate|Doxorubicin|Estradiol|Ethanol|Ethinyl Estradiol|Ethionine|Methyltestosterone|nimesulide|N-nitrosomorpholine|perfluorooctanoic acid|pirin…	68.71	106
CYP2B6	1555	Carcinoma, Hepatocellular	MESH:D006528	marker/mechanism	1,4-bis(2-(3,5-dichloropyridyloxy))benzene|Acetaminophen|Aflatoxin B1|aroclor 1260|Benzo(a)pyrene|Butylated Hydroxytoluene|Chlorodiphenyl (54% Chlorine)|Cimetidine|Clofibrate|Cyclophosphamide|cyproconazole|DDT|Dexamethasone|Diethylhexyl Phthalate|Diethylstilbestrol|Doxorubicin|Estradiol|Ethanol|Ethinyl Estradiol|Flavonoids|Hexachlorocyclohexane|Indomethacin|nimesulide|Pentachlorophenol|perfluorod…	68.69	151
EHD3	30845	Carcinoma, Hepatocellular	MESH:D006528	marker/mechanism	2,6-dinitrotoluene|4,4'-diaminodiphenylmethane|Acetaminophen|Benzo(a)pyrene|benzo(b)fluoranthene|Carbon Tetrachloride|Choline|Cisplatin|Decitabine|Dexamethasone|Diethylhexyl Phthalate|Doxorubicin|Estradiol|Ethanol|Ethinyl Estradiol|Fenretinide|Methionine|nimesulide|Phenobarbital|pirinixic acid|sodium arsenite|Tamoxifen|Tetrachlorodibenzodioxin|Tetradecanoylphorbol Acetate	68.24	115
PIK3CA	5290	Carcinoma, Hepatocellular	MESH:D006528	marker/mechanism	4,4'-diaminodiphenylmethane|Acetaminophen|Acrylamide|Arsenic Trioxide|Benzo(a)pyrene|Cisplatin|Copper|Curcumin|deguelin|Dexamethasone|Diethylhexyl Phthalate|Doxorubicin|Drugs, Chinese Herbal|Estradiol|Ethanol|Ethinyl Estradiol|Niclosamide|Nitric Oxide|perfluoro-n-nonanoic acid|perfluorooctanoic acid|Plant Extracts|Quercetin|Resveratrol|Sirolimus|sodium arsenite|Sorafenib|Tamoxifen|Tetrachlorodibe…	68.1	111
TAGLN2	8407	Carcinoma, Hepatocellular	MESH:D006528	marker/mechanism	2,4-dinitrotoluene|4,4'-diaminodiphenylmethane|Acetaminophen|Aflatoxin B1|Benzo(a)pyrene|Bleomycin|Bortezomib|Choline|ciprofibrate|Cisplatin|Copper|Diethylnitrosamine|Dimethylnitrosamine|Doxorubicin|Estradiol|Ethinyl Estradiol|Fenretinide|Methionine|Methyltestosterone|nimesulide|Phenobarbital|pirinixic acid|Quercetin|Resveratrol|sodium arsenite|Tetrachlorodibenzodioxin|Thioacetamide|Tretinoin	68.1	230
APC	324	Carcinoma, Hepatocellular	MESH:D006528	marker/mechanism	2,6-dinitrotoluene|2-amino-3-methylimidazo(4,5-f)quinoline|Acetaminophen|Aflatoxin B1|Cisplatin|Copper|Curcumin|Decitabine|Dexamethasone|Diethylnitrosamine|Drugs, Chinese Herbal|epigallocatechin gallate|Ethanol|Ethylnitrosourea|Indomethacin|Irinotecan|Methylnitronitrosoguanidine|Methyltestosterone|Phenobarbital|pirinixic acid|Plant Extracts|Quercetin|Sodium Selenite|tamibarotene|Temozolomide|Tetr…	67.3	214
MELK	9833	Carcinoma, Hepatocellular	MESH:D006528	marker/mechanism	Acetaminophen|Aflatoxin B1|Azathioprine|Benzo(a)pyrene|benzo(b)fluoranthene|Carbon Tetrachloride|Choline|Cisplatin|Cyclophosphamide|Doxorubicin|epigallocatechin gallate|Estradiol|Ethinyl Estradiol|Fluorouracil|Genistein|Methionine|Methotrexate|Paclitaxel|Phenobarbital|Resveratrol|sodium arsenite|Tetrachlorodibenzodioxin|Tetradecanoylphorbol Acetate|Thioacetamide|Topotecan|Troglitazone	67.29	129
NAT2	10	Carcinoma, Hepatocellular	MESH:D006528	marker/mechanism	1,4-bis(2-(3,5-dichloropyridyloxy))benzene|2-Acetylaminofluorene|2-amino-3,4-dimethylimidazo(4,5-f)quinoline|2-amino-3,8-dimethylimidazo(4,5-f)quinoxaline|2-amino-3-methyl-9H-pyrido(2,3-b)indole|2-amino-3-methylimidazo(4,5-f)quinoline|2-amino-6-methyldipyrido(1,2-a-3',2'-d)imidazole|2-amino-9H-pyrido(2,3-b)indole|2-aminofluorene|3-amino-1-methyl-5H-pyrido(4,3-b)indole|4,4'-diaminodiphenylmethane|…	67.24	208
CDCA2	157313	Carcinoma, Hepatocellular	MESH:D006528	marker/mechanism	1,4-bis(2-(3,5-dichloropyridyloxy))benzene|Acetaminophen|Acrylamide|Aflatoxin B1|Azathioprine|Benzo(a)pyrene|Carbon Tetrachloride|Choline|Cisplatin|Decitabine|Dexamethasone|Doxorubicin|Drugs, Chinese Herbal|Estradiol|Fenretinide|Indomethacin|Methionine|Niclosamide|Phenobarbital|pirinixic acid|Resveratrol|sodium arsenite|Tetrachlorodibenzodioxin|Tetradecanoylphorbol Acetate|Thioacetamide|Topotecan…	66.58	110
TACC3	10460	Carcinoma, Hepatocellular	MESH:D006528	marker/mechanism	Acetaminophen|Aflatoxin B1|Arsenic|Benzo(a)pyrene|benzo(b)fluoranthene|Carbon Tetrachloride|Chlorodiphenyl (54% Chlorine)|Choline|Cisplatin|Copper|Dichloroacetic Acid|Estradiol|Ethinyl Estradiol|Genistein|Methionine|Methotrexate|Niclosamide|Paclitaxel|Pentachlorophenol|Phenobarbital|pirinixic acid|Resveratrol|sodium arsenite|Tamoxifen|Tetrachlorodibenzodioxin|Topotecan|Trichloroethylene	66.58	124
CA2	760	Carcinoma, Hepatocellular	MESH:D006528	marker/mechanism	Acetaminophen|Aflatoxin B1|alpha-hexachlorocyclohexane|Azathioprine|Benzbromarone|Benzo(a)pyrene|Bleomycin|Butylated Hydroxyanisole|Butylated Hydroxytoluene|Cisplatin|Clofibrate|Copper|Cyclophosphamide|Dexamethasone|Diethylnitrosamine|Diethylstilbestrol|Estradiol|Ethanol|Ethinyl Estradiol|Ethionine|Fenretinide|Flavonoids|Genistein|Indomethacin|N-nitrosomorpholine|pirinixic acid|Quercetin|Resverat…	66.3	238
CD34	947	Carcinoma, Hepatocellular	MESH:D006528	marker/mechanism	Acetaminophen|Acrylamide|Aflatoxin B1|Arsenic Trioxide|Ascorbic Acid|benz(a)anthracene|Benzo(a)pyrene|benzo(b)fluoranthene|Chlorodiphenyl (54% Chlorine)|Choline|Copper|Daunorubicin|Doxorubicin|Estradiol|Ethanol|Fenretinide|Fluorouracil|Methionine|pirinixic acid|Prednisolone|sodium arsenite|Tetrachlorodibenzodioxin|Tetradecanoylphorbol Acetate|Tretinoin	66.19	80
LRAT	9227	Carcinoma, Hepatocellular	MESH:D006528	marker/mechanism	4,4'-diaminodiphenylmethane|Acetaminophen|Aflatoxin B1|Benzo(a)pyrene|Carbon Tetrachloride|cyproconazole|Diethylnitrosamine|Diethylstilbestrol|Dimethylnitrosamine|Estradiol|Ethanol|Ethinyl Estradiol|Fenretinide|momfluorothrin|nimesulide|Phenobarbital|pirinixic acid|Plant Extracts|Tetrachlorodibenzodioxin|Tetrachloroethylene|Tetradecanoylphorbol Acetate|Thioacetamide|Tretinoin|Trichloroethylene|Tr…	66.01	208
PRDX6	9588	Carcinoma, Hepatocellular	MESH:D006528	marker/mechanism	4,4'-diaminodiphenylmethane|Acetaminophen|Aflatoxin B1|Arsenic|Benzbromarone|Benzo(a)pyrene|Bleomycin|Carbon Tetrachloride|Cisplatin|Clofibrate|Copper|Curcumin|Decitabine|Dexamethasone|Doxorubicin|Ethanol|Ethinyl Estradiol|Ethionine|Lipopolysaccharides|Methionine|N-(2-(1,1'-bicyclopropyl)-2-ylphenyl)-3-(difluoromethyl)-1-methyl-1H-pyrazole-4-carboxamide|nimesulide|perfluorooctanoic acid|Phenobarb…	65.61	130
CCNA1	8900	Carcinoma, Hepatocellular	MESH:D006528	marker/mechanism	1,4-bis(2-(3,5-dichloropyridyloxy))benzene|Acetaminophen|Acetylcysteine|Aflatoxin B1|Arsenic|Arsenic Trioxide|Ascorbic Acid|Azacitidine|Benzo(a)pyrene|Cisplatin|Copper|Decitabine|Diethylhexyl Phthalate|Doxorubicin|Drugs, Chinese Herbal|Estradiol|Ethinyl Estradiol|Fluorouracil|Genistein|Lipopolysaccharides|Methylnitronitrosoguanidine|Pentachlorophenol|perfluorooctanoic acid|Pioglitazone|Quercetin|…	65.45	99
GTSE1	51512	Carcinoma, Hepatocellular	MESH:D006528	marker/mechanism	2-Acetylaminofluorene|Acetaminophen|Aflatoxin B1|Arsenic|Azathioprine|Benzo(a)pyrene|Copper|Dexamethasone|Dichloroacetic Acid|Diethylnitrosamine|Doxorubicin|Drugs, Chinese Herbal|Ethanol|Ethinyl Estradiol|Genistein|Indomethacin|Niclosamide|Paclitaxel|pirinixic acid|Resveratrol|sodium arsenite|Tetrachlorodibenzodioxin|Tetradecanoylphorbol Acetate|Thioacetamide|Topotecan|Tretinoin|Troglitazone	65.45	220
ADAMTS1	9510	Carcinoma, Hepatocellular	MESH:D006528	marker/mechanism	1,4-bis(2-(3,5-dichloropyridyloxy))benzene|1-nitropyrene|Acetaminophen|Aflatoxin B1|alpha-naphthoflavone|Arsenic|Arsenic Trioxide|Azacitidine|Benzo(a)pyrene|Carbon Tetrachloride|ciprofibrate|Copper|Decitabine|Dexamethasone|Diethylnitrosamine|Estradiol|Ethanol|Ethinyl Estradiol|Fenretinide|Indomethacin|Irinotecan|Lipopolysaccharides|pirinixic acid|Plant Extracts|sodium arsenite|Tetrachlorodibenzod…	65.12	215
COL15A1	1306	Carcinoma, Hepatocellular	MESH:D006528	marker/mechanism	Acetaminophen|Acrylamide|Benzo(a)pyrene|Carbon Tetrachloride|Cisplatin|Clofibrate|Copper|Dexamethasone|Doxorubicin|Estradiol|Ethinyl Estradiol|Fenretinide|Methotrexate|Paclitaxel|Phenobarbital|pirinixic acid|Plant Extracts|sodium arsenite|Tetrachlorodibenzodioxin|Tetradecanoylphorbol Acetate|Topotecan|Troglitazone|Vinyl Chloride	65.12	112
STAT4	6775	Carcinoma, Hepatocellular	MESH:D006528	marker/mechanism	Acetaminophen|Acrylamide|Active Hexose Correlated Compound|Arsenic|Arsenic Trioxide|Benzo(a)pyrene|Choline|Cisplatin|Curcumin|Dexamethasone|Doxorubicin|Estradiol|Ethinyl Estradiol|Indomethacin|Lipopolysaccharides|Methionine|Methotrexate|perfluorooctanoic acid|Phenytoin|Prednisolone|Resveratrol|sodium arsenite|Sodium Selenite|Tetrachlorodibenzodioxin|Tetradecanoylphorbol Acetate	64.94	74
FOSB	2354	Carcinoma, Hepatocellular	MESH:D006528	marker/mechanism	Acetaminophen|Acetylcysteine|Acrylamide|Arsenic|Arsenic Trioxide|Benzo(a)pyrene|Choline|Cisplatin|Clofibrate|Copper|Dexamethasone|Diethylhexyl Phthalate|epigallocatechin gallate|Estradiol|Ethanol|Irinotecan|Lipopolysaccharides|Methionine|Methotrexate|Niclosamide|Nitric Oxide|perfluorooctanoic acid|Pioglitazone|pirinixic acid|sodium arsenite|tamibarotene|Tetrachlorodibenzodioxin|Tetradecanoylphorb…	64.83	73
RND3	390	Carcinoma, Hepatocellular	MESH:D006528	marker/mechanism	1-nitropyrene|2,6-dinitrotoluene|4,4'-diaminodiphenylmethane|Acetaminophen|Acrylamide|Aflatoxin B1|Arsenic Trioxide|Benzo(a)pyrene|Bortezomib|Carbon Tetrachloride|Cisplatin|Clodronic Acid|Copper|cyproconazole|Diethylstilbestrol|Drugs, Chinese Herbal|Estradiol|Ethanol|Lipopolysaccharides|Methotrexate|Phenobarbital|pirinixic acid|sodium arsenite|Tamoxifen|Tetrachlorodibenzodioxin|Tetradecanoylphorb…	64.73	130
IDH1	3417	Carcinoma, Hepatocellular	MESH:D006528	marker/mechanism	1,4-bis(2-(3,5-dichloropyridyloxy))benzene|4,4'-diaminodiphenylmethane|Acetaminophen|Aflatoxin B1|Arsenic|Arsenic Trioxide|Azathioprine|Benzo(a)pyrene|Cisplatin|Clofibrate|Copper|Dexamethasone|Doxorubicin|Estradiol|Ethanol|Ethinyl Estradiol|Fenretinide|Hexachlorocyclohexane|Lipopolysaccharides|Methyltestosterone|N-nitrosomorpholine|Phenobarbital|pirinixic acid|Plant Extracts|Quercetin|sodium arse…	64.7	153
PLAC8	51316	Carcinoma, Hepatocellular	MESH:D006528	marker/mechanism	4,4'-diaminodiphenylmethane|Acetaminophen|Aflatoxin B1|benz(a)anthracene|Benzo(a)pyrene|benzo(b)fluoranthene|Carbon Tetrachloride|Chlorodiphenyl (54% Chlorine)|Choline|Cisplatin|Clofibrate|Copper|Dimethylnitrosamine|Doxorubicin|Estradiol|Ethinyl Estradiol|Fenretinide|Lipopolysaccharides|Methionine|Methotrexate|Pentachlorophenol|Tamoxifen|Tetrachlorodibenzodioxin|Tetradecanoylphorbol Acetate|Thioa…	63.96	93
C9	735	Carcinoma, Hepatocellular	MESH:D006528	marker/mechanism	1,4-bis(2-(3,5-dichloropyridyloxy))benzene|2,4-dinitrotoluene|4,4'-diaminodiphenylmethane|Aflatoxin B1|Arsenic|Benzo(a)pyrene|Carbon Tetrachloride|Chlorodiphenyl (54% Chlorine)|ciprofibrate|Copper|Dichloroacetic Acid|Diethylhexyl Phthalate|Diethylnitrosamine|Estradiol|Ethanol|Ethinyl Estradiol|Methotrexate|nimesulide|perfluoro-n-nonanoic acid|perfluorooctanoic acid|Phenobarbital|pirinixic acid|so…	63.92	209
CFP	5199	Carcinoma, Hepatocellular	MESH:D006528	marker/mechanism	4,4'-diaminodiphenylmethane|Acetaminophen|Aflatoxin B1|Benzo(a)pyrene|benzo(b)fluoranthene|Carbon Tetrachloride|Chlorodiphenyl (54% Chlorine)|Cisplatin|Copper|Dimethylnitrosamine|Estradiol|Ethinyl Estradiol|Lipopolysaccharides|Niclosamide|Phenobarbital|pirinixic acid|Resveratrol|sodium arsenite|Streptozocin|sulforafan|Tetrachlorodibenzodioxin|Tetradecanoylphorbol Acetate|Troglitazone	63.49	105
TST	7263	Carcinoma, Hepatocellular	MESH:D006528	marker/mechanism	2,4-dinitrotoluene|4,4'-diaminodiphenylmethane|Acetaminophen|Acrylamide|Aflatoxin B1|Benzo(a)pyrene|Carbon Tetrachloride|Cisplatin|Clofibrate|Copper|Dexamethasone|Ethinyl Estradiol|Fenretinide|Flavonoids|Fluorouracil|Indomethacin|N-nitrosomorpholine|perfluorooctanoic acid|Quercetin|Resveratrol|sodium arsenite|Tamoxifen|Tetrachlorodibenzodioxin|Topotecan|Tretinoin|Troglitazone	63.36	118
UCHL1	7345	Carcinoma, Hepatocellular	MESH:D006528	marker/mechanism	Acetaminophen|Aflatoxin B1|Arsenic Trioxide|Benzo(a)pyrene|benzo(b)fluoranthene|Choline|Copper|Decitabine|Dexamethasone|Doxorubicin|Ethanol|Ethinyl Estradiol|Flavonoids|Fluorouracil|Genistein|Indomethacin|Methionine|Methylnitronitrosoguanidine|Methyltestosterone|Paclitaxel|Pentachlorophenol|perfluorooctanoic acid|pirinixic acid|sodium arsenite|Streptozocin|Tetrachlorodibenzodioxin|Topotecan|Treti…	62.99	90
CD5L	922	Carcinoma, Hepatocellular	MESH:D006528	marker/mechanism	4,4'-diaminodiphenylmethane|Acetaminophen|Aflatoxin B1|Benzo(a)pyrene|Carbon Tetrachloride|Cisplatin|Clofibrate|Dimethylnitrosamine|Estradiol|Ethinyl Estradiol|Lipopolysaccharides|nimesulide|Pentachlorophenol|Phenobarbital|pirinixic acid|Resveratrol|sodium arsenite|Streptozocin|Tamoxifen|Tetrachlorodibenzodioxin|Topotecan|Troglitazone	62.85	119
TALDO1	6888	Carcinoma, Hepatocellular	MESH:D006528	marker/mechanism	2-Acetylaminofluorene|4,4'-diaminodiphenylmethane|Acetaminophen|Acetylcysteine|Aflatoxin B1|Arsenic Trioxide|Benzo(a)pyrene|Bleomycin|Carbon Tetrachloride|Cisplatin|Clofibrate|Curcumin|Diethylnitrosamine|Doxorubicin|Estradiol|Ethinyl Estradiol|Nitric Oxide|Phenobarbital|pirinixic acid|pyrazolanthrone|Quercetin|Resveratrol|sodium arsenite|Tetrachlorodibenzodioxin|Thioacetamide|Troglitazone	62.54	233
IRF2	3660	Carcinoma, Hepatocellular	MESH:D006528	marker/mechanism	1,4-bis(2-(3,5-dichloropyridyloxy))benzene|4,4'-diaminodiphenylmethane|Acetaminophen|Acrylamide|Aflatoxin B1|Benzo(a)pyrene|Cisplatin|Clofibrate|Dexamethasone|Doxorubicin|epigallocatechin gallate|Estrogens|Flavonoids|Lipopolysaccharides|Phenobarbital|pirinixic acid|Plant Extracts|Tetrachlorodibenzodioxin|Tetrachloroethylene|Tetradecanoylphorbol Acetate|Topotecan|Trichloroethylene	62.43	95
SERPINA1	5265	Carcinoma, Hepatocellular	MESH:D006528	marker/mechanism	Acetaminophen|Arsenic Trioxide|Azathioprine|Benzbromarone|Benzo(a)pyrene|Carbon Tetrachloride|Clofibrate|Copper|cyproconazole|Decitabine|Dexamethasone|Doxorubicin|Estradiol|Ethinyl Estradiol|Ethionine|Genistein|Indomethacin|Lipopolysaccharides|N-nitrosomorpholine|Pentachlorophenol|perfluorooctanoic acid|pirinixic acid|Plant Extracts|Resveratrol|Sirolimus|sodium arsenite|Tetrachlorodibenzodioxin|T…	61.96	97
RPS6KA3	6197	Carcinoma, Hepatocellular	MESH:D006528	marker/mechanism	4,4'-diaminodiphenylmethane|Acetaminophen|Aflatoxin B1|Arsenic Trioxide|Benzo(a)pyrene|Choline|Cisplatin|Doxorubicin|epigallocatechin gallate|Estradiol|Ethanol|Ethinyl Estradiol|Fenretinide|Genistein|Methionine|Methotrexate|Phenytoin|Plant Extracts|Quercetin|Sirolimus|tamibarotene|Tetrachlorodibenzodioxin|Tetradecanoylphorbol Acetate|Thioacetamide|Tretinoin	61.84	87
UBE2T	29089	Carcinoma, Hepatocellular	MESH:D006528	marker/mechanism	Acetaminophen|Acrylamide|Aflatoxin B1|Azathioprine|Benzo(a)pyrene|Carbon Tetrachloride|Choline|Cisplatin|Copper|Dexamethasone|Doxorubicin|Estradiol|Ethinyl Estradiol|Fluorouracil|Genistein|Indomethacin|Methionine|Methyltestosterone|Phenobarbital|pirinixic acid|Resveratrol|sodium arsenite|Tetrachlorodibenzodioxin|Tetradecanoylphorbol Acetate|Thioacetamide|Topotecan	61.74	128
HHIP	64399	Carcinoma, Hepatocellular	MESH:D006528	marker/mechanism	Acetylcysteine|Aflatoxin B1|Benzo(a)pyrene|Carbon Tetrachloride|Choline|Copper|Decitabine|Dexamethasone|Diethylnitrosamine|Doxorubicin|Estradiol|Ethanol|Ethinyl Estradiol|Genistein|Methionine|Pentachlorophenol|Pioglitazone|Resveratrol|sodium arsenite|sulforafan|Tetrachlorodibenzodioxin|Tetradecanoylphorbol Acetate|Tretinoin	61.62	203
IQGAP1	8826	Carcinoma, Hepatocellular	MESH:D006528	marker/mechanism	4,4'-diaminodiphenylmethane|Acetaminophen|Acrylamide|Aflatoxin B1|Benzo(a)pyrene|Carbon Tetrachloride|Choline|Diethylnitrosamine|Dimethylnitrosamine|Doxorubicin|Estradiol|Ethanol|Ethinyl Estradiol|gemcitabine|Griseofulvin|Lipopolysaccharides|Methionine|Phenobarbital|pirinixic acid|Quercetin|sodium arsenite|Tetrachlorodibenzodioxin|Tetradecanoylphorbol Acetate|Vitamin E	61.61	210
KIF4A	24137	Carcinoma, Hepatocellular	MESH:D006528	marker/mechanism	Acetaminophen|Aflatoxin B1|Arsenic|Benzo(a)pyrene|Cisplatin|Copper|Dexamethasone|Doxorubicin|epigallocatechin gallate|Estradiol|Ethinyl Estradiol|Fenretinide|Genistein|Indomethacin|Methotrexate|pirinixic acid|Quercetin|sodium arsenite|Sodium Selenite|Tetrachlorodibenzodioxin|Tetradecanoylphorbol Acetate|Topotecan|Troglitazone	60.57	73
CENPU	79682	Carcinoma, Hepatocellular	MESH:D006528	marker/mechanism	Acetaminophen|Aflatoxin B1|Azathioprine|Benzo(a)pyrene|Cisplatin|Copper|Decitabine|Dexamethasone|Estradiol|Ethinyl Estradiol|Fluorouracil|Genistein|Indomethacin|Lipopolysaccharides|Phenobarbital|Plant Extracts|Quercetin|Resveratrol|sodium arsenite|Tetrachlorodibenzodioxin|Tetradecanoylphorbol Acetate|Topotecan|Tretinoin|Troglitazone	60.36	117
CYP39A1	51302	Carcinoma, Hepatocellular	MESH:D006528	marker/mechanism	1,4-bis(2-(3,5-dichloropyridyloxy))benzene|2,4-dinitrotoluene|Acetaminophen|Aflatoxin B1|Arsenic Trioxide|Benzo(a)pyrene|Carbon Tetrachloride|Choline|Cisplatin|Dichloroacetic Acid|Diethylhexyl Phthalate|Diethylnitrosamine|Ethanol|Fenretinide|Lipopolysaccharides|Methionine|Niclosamide|Pentachlorophenol|Phenobarbital|pirinixic acid|Tetrachlorodibenzodioxin|Thioacetamide|Tretinoin	60.23	213
ZFP36	7538	Carcinoma, Hepatocellular	MESH:D006528	marker/mechanism	Acetaminophen|Arsenic Trioxide|Benzo(a)pyrene|Carbon Tetrachloride|Cisplatin|Copper|Dexamethasone|Doxorubicin|Estradiol|Ethinyl Estradiol|Fenretinide|Indomethacin|Iron|Lipopolysaccharides|Niclosamide|Phenobarbital|Pioglitazone|pirinixic acid|Plant Extracts|Quercetin|Resveratrol|sodium arsenite|Sodium Selenite|Tamoxifen|Tetrachlorodibenzodioxin|Tetradecanoylphorbol Acetate|Topotecan|Trichloroethyl…	59.79	131
KIF14	9928	Carcinoma, Hepatocellular	MESH:D006528	marker/mechanism	1,4-bis(2-(3,5-dichloropyridyloxy))benzene|Acetaminophen|Acrylamide|Aflatoxin B1|Cisplatin|Docetaxel|Doxorubicin|epigallocatechin gallate|Estradiol|Genistein|Indomethacin|Irinotecan|Methotrexate|Pentachlorophenol|pirinixic acid|Quercetin|Resveratrol|sodium arsenite|Sodium Selenite|Tetrachlorodibenzodioxin|Troglitazone	59.31	64
SFRP1	6422	Carcinoma, Hepatocellular	MESH:D006528	marker/mechanism	Aflatoxin B1|Arsenic Trioxide|Benzo(a)pyrene|Bleomycin|Choline|Cisplatin|Decitabine|Dexamethasone|Diethylnitrosamine|Doxorubicin|epigallocatechin gallate|Estradiol|Ethanol|Ethinyl Estradiol|Fenretinide|Leucovorin|Methotrexate|pirinixic acid|Quercetin|Resveratrol|sulforafan|Tamoxifen|Tetrachlorodibenzodioxin|Tetradecanoylphorbol Acetate|Topotecan|Tretinoin	59.04	234
BMPER	168667	Carcinoma, Hepatocellular	MESH:D006528	marker/mechanism	1-nitropyrene|2,6-dinitrotoluene|4,4'-diaminodiphenylmethane|Acetaminophen|Aflatoxin B1|Arsenic|Benzo(a)pyrene|Choline|Cisplatin|Copper|Decitabine|Dexamethasone|Dichloroacetic Acid|epigallocatechin gallate|Estradiol|Fenretinide|Methionine|Methotrexate|pirinixic acid|sodium arsenite|Tetrachlorodibenzodioxin|Tretinoin	58.93	58
KIFC1	3833	Carcinoma, Hepatocellular	MESH:D006528	marker/mechanism	1,4-bis(2-(3,5-dichloropyridyloxy))benzene|2-amino-3,8-dimethylimidazo(4,5-f)quinoxaline|4,4'-diaminodiphenylmethane|Acetaminophen|Acrylamide|Aflatoxin B1|Arsenic|Benzo(a)pyrene|benzo(b)fluoranthene|Bortezomib|Choline|Copper|Doxorubicin|Estradiol|Methionine|Methotrexate|Niclosamide|pirinixic acid|Quercetin|Sirolimus|sodium arsenite|Tetrachlorodibenzodioxin|Tetradecanoylphorbol Acetate|Thioacetami…	58.86	61
VASN	114990	Carcinoma, Hepatocellular	MESH:D006528	marker/mechanism	Acetaminophen|Benzo(a)pyrene|Carbon Tetrachloride|Cisplatin|Clofibrate|Estradiol|Ethinyl Estradiol|Fenretinide|Genistein|Methotrexate|perfluorooctanoic acid|Phenobarbital|Pioglitazone|pirinixic acid|Plant Extracts|Quercetin|Sirolimus|Tamoxifen|Tetrachlorodibenzodioxin|Topotecan|Tretinoin|Troglitazone	58.58	104
ARHGAP11A	9824	Carcinoma, Hepatocellular	MESH:D006528	marker/mechanism	1,4-bis(2-(3,5-dichloropyridyloxy))benzene|Acetaminophen|Acrylamide|Aflatoxin B1|Azathioprine|Benzo(a)pyrene|Carbon Tetrachloride|Cisplatin|Copper|Dichloroacetic Acid|Doxorubicin|epigallocatechin gallate|Ethanol|Fenretinide|Methotrexate|Phenobarbital|pirinixic acid|Quercetin|sodium arsenite|Tetrachlorodibenzodioxin|Tetradecanoylphorbol Acetate|Thioacetamide|Topotecan	58.3	112
KMT2A	4297	Carcinoma, Hepatocellular	MESH:D006528	marker/mechanism	2,4-dinitrotoluene|2,6-dinitrotoluene|Acetaminophen|Aflatoxin B1|Arsenic Trioxide|Benzo(a)pyrene|Bortezomib|Cisplatin|Diethylstilbestrol|Doxorubicin|Estradiol|Ethanol|Genistein|momfluorothrin|Pentachlorophenol|perfluorodecanoic acid|perfluoro-n-nonanoic acid|perfluorooctanoic acid|pirinixic acid|Prednisolone|Quercetin|sodium arsenite|Tetrachlorodibenzodioxin|Tretinoin|Troglitazone	58.11	75
CDC45	8318	Carcinoma, Hepatocellular	MESH:D006528	marker/mechanism	Acetaminophen|Acrylamide|Arsenic Trioxide|Azathioprine|Benzo(a)pyrene|Cisplatin|Copper|Diethylnitrosamine|Doxorubicin|Estradiol|Ethinyl Estradiol|Fluorouracil|Genistein|Indomethacin|Leucovorin|Niclosamide|pirinixic acid|Quercetin|sodium arsenite|Tetrachlorodibenzodioxin|Thioacetamide|Tretinoin	57.88	212
KIF15	56992	Carcinoma, Hepatocellular	MESH:D006528	marker/mechanism	1,4-bis(2-(3,5-dichloropyridyloxy))benzene|Acetaminophen|Aflatoxin B1|Arsenic|Azathioprine|Benzo(a)pyrene|Cisplatin|Copper|Doxorubicin|Drugs, Chinese Herbal|epigallocatechin gallate|Estradiol|Fluorouracil|Genistein|Methotrexate|Plant Extracts|Quercetin|Resveratrol|sodium arsenite|Tetrachlorodibenzodioxin|Tetradecanoylphorbol Acetate|Topotecan|Trichloroethylene|Troglitazone	57.8	83
YAP1	10413	Carcinoma, Hepatocellular	MESH:D006528	marker/mechanism	1,4-bis(2-(3,5-dichloropyridyloxy))benzene|2-amino-3,8-dimethylimidazo(4,5-f)quinoxaline|Acetaminophen|Aflatoxin B1|Arsenic|Benzo(a)pyrene|Choline|Cisplatin|Dexamethasone|Diethylnitrosamine|Doxorubicin|Estradiol|Ethanol|Ethinyl Estradiol|gemcitabine|Indomethacin|Methionine|Pentachlorophenol|Quercetin|sodium arsenite|Sorafenib|Tetrachlorodibenzodioxin|Trichloroethylene	57.7	217
SLIT2	9353	Carcinoma, Hepatocellular	MESH:D006528	marker/mechanism	2,6-dinitrotoluene|Acetaminophen|Acrylamide|Aflatoxin B1|Benzo(a)pyrene|Choline|Cisplatin|Copper|cyproconazole|Decitabine|Dexamethasone|Doxorubicin|Estradiol|Estrogens|Ethanol|Fenretinide|Methionine|N-(2-(1,1'-bicyclopropyl)-2-ylphenyl)-3-(difluoromethyl)-1-methyl-1H-pyrazole-4-carboxamide|pirinixic acid|sodium arsenite|Tetrachlorodibenzodioxin|Topotecan|Tretinoin|Troglitazone	57.54	69
PGK1	5230	Carcinoma, Hepatocellular	MESH:D006528	marker/mechanism	1,4-bis(2-(3,5-dichloropyridyloxy))benzene|4,4'-diaminodiphenylmethane|Acetaminophen|Aflatoxin B1|alpha-naphthoflavone|Arsenic|Arsenic Trioxide|Benzo(a)pyrene|Butylated Hydroxytoluene|Chlorodiphenyl (54% Chlorine)|Cisplatin|Copper|Dexamethasone|Doxorubicin|Ethanol|Ethinyl Estradiol|Genistein|Indomethacin|Methylnitronitrosoguanidine|Pentachlorophenol|perfluorooctanoic acid|Phenobarbital|Quercetin|…	57.52	141
ITIH3	3699	Carcinoma, Hepatocellular	MESH:D006528	marker/mechanism	1,4-bis(2-(3,5-dichloropyridyloxy))benzene|2,6-dinitrotoluene|Acetaminophen|Aflatoxin B1|Benzo(a)pyrene|Carbon Tetrachloride|Chlorodiphenyl (54% Chlorine)|Clofibrate|cyproconazole|Dichloroacetic Acid|Diethylnitrosamine|Ethanol|Ethinyl Estradiol|Lipopolysaccharides|perfluorooctanoic acid|pirinixic acid|Plant Extracts|Quercetin|Resveratrol|sodium arsenite|Tamoxifen|Tetrachlorodibenzodioxin|Thioacet…	57.4	213
OLFML2B	25903	Carcinoma, Hepatocellular	MESH:D006528	marker/mechanism	4,4'-diaminodiphenylmethane|Acrylamide|Azathioprine|Benzo(a)pyrene|Carbon Tetrachloride|Clofibrate|Copper|Dimethylnitrosamine|epigallocatechin gallate|Estradiol|Ethanol|Lipopolysaccharides|pirinixic acid|Prednisolone|sulforafan|Tetrachlorodibenzodioxin|Tetradecanoylphorbol Acetate|Topotecan|Troglitazone|Vinyl Chloride	57.04	46
IGF2R	3482	Carcinoma, Hepatocellular	MESH:D006528	marker/mechanism	4,4'-diaminodiphenylmethane|Acetaminophen|Aflatoxin B1|Arsenic|Arsenic Trioxide|Benzo(a)pyrene|benzo(b)fluoranthene|Carbon Tetrachloride|Copper|Dexamethasone|Diethylhexyl Phthalate|Diethylnitrosamine|Doxorubicin|Estradiol|Ethanol|Ethinyl Estradiol|Genistein|Phenobarbital|pirinixic acid|Resveratrol|sodium arsenite|Tetrachlorodibenzodioxin|Tetradecanoylphorbol Acetate|Thioacetamide|Tretinoin|Vitami…	57.03	228
AKR1C2	1646	Carcinoma, Hepatocellular	MESH:D006528	marker/mechanism	2-aminophenol|Acetaminophen|Acrylamide|Aflatoxin B1|Arsenic Trioxide|Ascorbic Acid|Azathioprine|Benzbromarone|Benzo(a)pyrene|Bortezomib|Budesonide|cinnamic aldehyde|Cisplatin|Clodronic Acid|Copper|Daunorubicin|Diethylhexyl Phthalate|Doxorubicin|Estradiol|Ethinyl Estradiol|Fluorouracil|Indomethacin|Paclitaxel|perfluorooctanoic acid|pirinixic acid|Quercetin|sodium arsenite|sulforafan|Tetrachlorodib…	56.95	100
ROBO1	6091	Carcinoma, Hepatocellular	MESH:D006528	marker/mechanism	Acetaminophen|Acrylamide|Aflatoxin B1|Arsenic|Arsenic Trioxide|Benzo(a)pyrene|Carbon Tetrachloride|Copper|Decitabine|Dexamethasone|Diethylhexyl Phthalate|Diethylnitrosamine|Doxorubicin|Estradiol|Ethanol|Ethinyl Estradiol|Phenobarbital|pyrazolanthrone|Quercetin|sodium arsenite|Tetrachlorodibenzodioxin|Tretinoin|Trichloroethylene	56.82	222
PCLAF	9768	Carcinoma, Hepatocellular	MESH:D006528	marker/mechanism	Acetaminophen|Aflatoxin B1|Azathioprine|Benzo(a)pyrene|Cisplatin|Copper|Dexamethasone|Diethylnitrosamine|Estradiol|Ethinyl Estradiol|Fenretinide|Fluorouracil|Genistein|Indomethacin|Irinotecan|Methotrexate|Methyltestosterone|Resveratrol|sodium arsenite|Tamoxifen|Tetrachlorodibenzodioxin|Tetradecanoylphorbol Acetate|Topotecan|Vitamin E	56.75	232
LYVE1	10894	Carcinoma, Hepatocellular	MESH:D006528	marker/mechanism	Acetaminophen|Aflatoxin B1|benz(a)anthracene|Benzo(a)pyrene|benzo(b)fluoranthene|Carbon Tetrachloride|Copper|Diethylstilbestrol|Doxorubicin|Drugs, Chinese Herbal|Estradiol|Fenretinide|Lipopolysaccharides|N-(2-(1,1'-bicyclopropyl)-2-ylphenyl)-3-(difluoromethyl)-1-methyl-1H-pyrazole-4-carboxamide|nimesulide|Phenobarbital|pirinixic acid|Tetrachlorodibenzodioxin|Tetrachloroethylene|Topotecan	56.62	87
CYLD	1540	Carcinoma, Hepatocellular	MESH:D006528	marker/mechanism	2,6-dinitrotoluene|Acetaminophen|Acrylamide|Aflatoxin B1|Arsenic Trioxide|benz(a)anthracene|Benzo(a)pyrene|benzo(b)fluoranthene|Choline|Cisplatin|Copper|Doxorubicin|Ethanol|Fenretinide|Fluorouracil|Methionine|Methotrexate|pirinixic acid|sodium arsenite|Sorafenib|Tetrachlorodibenzodioxin|Tetradecanoylphorbol Acetate	56.57	95
MED1	5469	Carcinoma, Hepatocellular	MESH:D006528	marker/mechanism	1,4-bis(2-(3,5-dichloropyridyloxy))benzene|Acetaminophen|Arsenic|Arsenic Trioxide|Benzo(a)pyrene|Chlorodiphenyl (54% Chlorine)|ciprofibrate|Cisplatin|Cyproterone Acetate|Dexamethasone|Diethylnitrosamine|Doxorubicin|Estradiol|Fenretinide|Paclitaxel|Phenobarbital|pirinixic acid|Tetrachlorodibenzodioxin|Tetradecanoylphorbol Acetate|Tretinoin|Trichloroethylene|Vinyl Chloride|Vitamin E	56.54	220
MLXIPL	51085	Carcinoma, Hepatocellular	MESH:D006528	marker/mechanism	1,4-bis(2-(3,5-dichloropyridyloxy))benzene|4,4'-diaminodiphenylmethane|Acetaminophen|Aflatoxin B1|Benzo(a)pyrene|Carbon Tetrachloride|Cholesterol|Choline|Cisplatin|Decitabine|Dexamethasone|Estradiol|Ethanol|Ethinyl Estradiol|Fenretinide|Indomethacin|Irinotecan|Methionine|pirinixic acid|Sodium Selenite|Tamoxifen|Tetrachlorodibenzodioxin|Thioacetamide	56.26	82
UBE2E2	7325	Carcinoma, Hepatocellular	MESH:D006528	marker/mechanism	2,4-dinitrotoluene|Acetaminophen|Aflatoxin B1|Arsenic|Benzo(a)pyrene|Choline|Cisplatin|Diethylnitrosamine|Doxorubicin|Estradiol|Methionine|Pentachlorophenol|Phenobarbital|pirinixic acid|Quercetin|sodium arsenite|Tetrachlorodibenzodioxin|Thioacetamide|Topotecan	56.14	202
CSPG4	1464	Carcinoma, Hepatocellular	MESH:D006528	marker/mechanism	4,4'-diaminodiphenylmethane|Acetaminophen|Aflatoxin B1|Arsenic|Benzo(a)pyrene|Cisplatin|Copper|Decitabine|Diethylnitrosamine|Doxorubicin|epigallocatechin gallate|Estradiol|Ethanol|Ethinyl Estradiol|Flavonoids|Methyltestosterone|Tamoxifen|Tetrachlorodibenzodioxin|Ursodeoxycholic Acid|Vitamin E	55.8	219
CCR1	1230	Carcinoma, Hepatocellular	MESH:D006528	marker/mechanism	Acetaminophen|Acrylamide|Aflatoxin B1|Arsenic|Arsenic Trioxide|Benzo(a)pyrene|Carbon Tetrachloride|Choline|Cisplatin|Cyproterone Acetate|Diethylnitrosamine|Doxorubicin|Ethinyl Estradiol|Fenretinide|Irinotecan|Lipopolysaccharides|pirinixic acid|Resveratrol|tamibarotene|Tetrachlorodibenzodioxin|Tetradecanoylphorbol Acetate|Thioacetamide|Topotecan|Tretinoin	55.75	221
SLC25A47	283600	Carcinoma, Hepatocellular	MESH:D006528	marker/mechanism	1,4-bis(2-(3,5-dichloropyridyloxy))benzene|Acetaminophen|Acetylcysteine|Aflatoxin B1|Benzo(a)pyrene|Carbon Tetrachloride|Clofibrate|Dichloroacetic Acid|Diethylnitrosamine|Doxorubicin|N-(2-(1,1'-bicyclopropyl)-2-ylphenyl)-3-(difluoromethyl)-1-methyl-1H-pyrazole-4-carboxamide|perfluorooctanoic acid|Phenobarbital|Plant Extracts|Streptozocin|Tetrachlorodibenzodioxin|Thioacetamide|Trichloroethylene	55.5	194
KMT2C	58508	Carcinoma, Hepatocellular	MESH:D006528	marker/mechanism	2,6-dinitrotoluene|Acetaminophen|Acrylamide|Aflatoxin B1|Arsenic Trioxide|Benzo(a)pyrene|Choline|Cisplatin|Diethylstilbestrol|Doxorubicin|epigallocatechin gallate|Estradiol|Ethanol|Ethinyl Estradiol|Methionine|N-(2-(1,1'-bicyclopropyl)-2-ylphenyl)-3-(difluoromethyl)-1-methyl-1H-pyrazole-4-carboxamide|Phenobarbital|Tetrachlorodibenzodioxin|Tetradecanoylphorbol Acetate|Troglitazone	55.4	110
TSC1	7248	Carcinoma, Hepatocellular	MESH:D006528	marker/mechanism	1,4-bis(2-(3,5-dichloropyridyloxy))benzene|Acetaminophen|Aflatoxin B1|antroquinonol|Azacitidine|Cisplatin|Clofibrate|Decitabine|Diethylhexyl Phthalate|Doxorubicin|Ethinyl Estradiol|Phenobarbital|pirinixic acid|Quercetin|Resveratrol|Sirolimus|sodium arsenite|Tamoxifen|Temozolomide|Tetrachlorodibenzodioxin|Troglitazone	55.2	125
MFSD2A	84879	Carcinoma, Hepatocellular	MESH:D006528	marker/mechanism	Acetaminophen|Aflatoxin B1|Arsenic|benz(a)anthracene|Benzo(a)pyrene|benzo(b)fluoranthene|Carbon Tetrachloride|Dichloroacetic Acid|Diethylhexyl Phthalate|Diethylnitrosamine|Diethylstilbestrol|Estradiol|Ethanol|Ethinyl Estradiol|Fenretinide|Lipopolysaccharides|N-(2-(1,1'-bicyclopropyl)-2-ylphenyl)-3-(difluoromethyl)-1-methyl-1H-pyrazole-4-carboxamide|Phenobarbital|pirinixic acid|sodium arsenite|Tet…	54.74	206
COMT	1312	Carcinoma, Hepatocellular	MESH:D006528	marker/mechanism	2-Methoxyestradiol|Acetaminophen|Aflatoxin B1|Benzo(a)pyrene|Carbon Tetrachloride|Cisplatin|Cyclophosphamide|cyproconazole|Decitabine|Dexamethasone|Diethylnitrosamine|Diethylstilbestrol|epigallocatechin gallate|Estradiol|Estrogens|Ethinyl Estradiol|Genistein|Methotrexate|N-nitrosomorpholine|perfluorooctanoic acid|Phenobarbital|pirinixic acid|Plant Preparations|Quercetin|Resveratrol|sodium arsenit…	54.36	244
GYS2	2998	Carcinoma, Hepatocellular	MESH:D006528	marker/mechanism	1,4-bis(2-(3,5-dichloropyridyloxy))benzene|Acetaminophen|Aflatoxin B1|Benzo(a)pyrene|Carbon Tetrachloride|Cisplatin|Decitabine|Dexamethasone|Diethylnitrosamine|Estradiol|Ethanol|Ethinyl Estradiol|N-(2-(1,1'-bicyclopropyl)-2-ylphenyl)-3-(difluoromethyl)-1-methyl-1H-pyrazole-4-carboxamide|Pentachlorophenol|perfluorooctanoic acid|Phenobarbital|pirinixic acid|Resveratrol|sodium arsenite|Streptozocin|…	54.17	212
UMPS	7372	Carcinoma, Hepatocellular	MESH:D006528	marker/mechanism	2,4-dinitrotoluene|2,6-dinitrotoluene|Acrylamide|Arsenic|Benzo(a)pyrene|Cisplatin|Copper|Diethylnitrosamine|Docetaxel|Estrogens|Ethinyl Estradiol|Fluorouracil|Methotrexate|nimesulide|Paclitaxel|perfluorooctanoic acid|Pioglitazone|Plant Extracts|Tetrachlorodibenzodioxin|Tetradecanoylphorbol Acetate|Thioacetamide|Troglitazone	54.17	198
CDT1	81620	Carcinoma, Hepatocellular	MESH:D006528	marker/mechanism	1,4-bis(2-(3,5-dichloropyridyloxy))benzene|Acetaminophen|Aflatoxin B1|Benzo(a)pyrene|benzo(b)fluoranthene|Bortezomib|Carbon Tetrachloride|Cisplatin|Diethylnitrosamine|Estradiol|Estrogens|Ethinyl Estradiol|Fenretinide|Genistein|Pentachlorophenol|Phenobarbital|pirinixic acid|Quercetin|Resveratrol|sodium arsenite|Tetrachlorodibenzodioxin|Topotecan|Tretinoin|Troglitazone	53.87	213
RAD54L	8438	Carcinoma, Hepatocellular	MESH:D006528	marker/mechanism	1,4-bis(2-(3,5-dichloropyridyloxy))benzene|2-amino-3,8-dimethylimidazo(4,5-f)quinoxaline|Acetaminophen|Aflatoxin B1|Arsenic|Benzo(a)pyrene|Carbon Tetrachloride|Cisplatin|Copper|Cyclophosphamide|Ethinyl Estradiol|Indomethacin|Niclosamide|Pentachlorophenol|Quercetin|Resveratrol|sodium arsenite|Tetrachlorodibenzodioxin|Tetradecanoylphorbol Acetate|Topotecan|Troglitazone	53.58	74
SRPX	8406	Carcinoma, Hepatocellular	MESH:D006528	marker/mechanism	Aflatoxin B1|Arsenic Trioxide|Azacitidine|Benzo(a)pyrene|Choline|Cisplatin|Decitabine|Dexamethasone|Estradiol|Fenretinide|Indomethacin|Irinotecan|Methionine|Pioglitazone|pirinixic acid|Quercetin|sodium arsenite|Tetrachlorodibenzodioxin|Topotecan|Tretinoin|Troglitazone	53.58	60
TROAP	10024	Carcinoma, Hepatocellular	MESH:D006528	marker/mechanism	1,4-bis(2-(3,5-dichloropyridyloxy))benzene|Acetaminophen|Acetylcysteine|Acrylamide|Aflatoxin B1|Arsenic|Benzo(a)pyrene|Dexamethasone|Diethylnitrosamine|Doxorubicin|Ethanol|Fluorouracil|Indomethacin|Resveratrol|sodium arsenite|tamibarotene|Tetrachlorodibenzodioxin|Tetradecanoylphorbol Acetate|Topotecan|Tretinoin|Vanadium	53.58	207
BCO2	83875	Carcinoma, Hepatocellular	MESH:D006528	marker/mechanism	1,4-bis(2-(3,5-dichloropyridyloxy))benzene|4,4'-diaminodiphenylmethane|Acetaminophen|Aflatoxin B1|Arsenic|beta Carotene|Carbon Tetrachloride|Cisplatin|Diethylnitrosamine|Ethinyl Estradiol|Fenretinide|Phenobarbital|pirinixic acid|sodium arsenite|Tetrachlorodibenzodioxin|Tetradecanoylphorbol Acetate|Thioacetamide|Tretinoin|Vitamin A	53.51	204
FANCI	55215	Carcinoma, Hepatocellular	MESH:D006528	marker/mechanism	1,4-bis(2-(3,5-dichloropyridyloxy))benzene|Acetaminophen|Aflatoxin B1|Azathioprine|Benzo(a)pyrene|Cisplatin|Curcumin|Dexamethasone|Dichloroacetic Acid|Doxorubicin|Estradiol|Fluorouracil|Genistein|Indomethacin|Methyltestosterone|Plant Extracts|Quercetin|Resveratrol|sodium arsenite|Tetrachlorodibenzodioxin|Tetradecanoylphorbol Acetate|Topotecan	53.34	81
PDGFRL	5157	Carcinoma, Hepatocellular	MESH:D006528	marker/mechanism	1-nitropyrene|Acetaminophen|Aflatoxin B1|Benzo(a)pyrene|benzo(b)fluoranthene|Copper|Decitabine|Dexamethasone|Diethylstilbestrol|Doxorubicin|Estradiol|Ethinyl Estradiol|Indomethacin|pirinixic acid|Plant Extracts|Quercetin|sodium arsenite|Tetrachlorodibenzodioxin|Tetradecanoylphorbol Acetate|Topotecan|Tretinoin	52.97	64
ARID1B	57492	Carcinoma, Hepatocellular	MESH:D006528	marker/mechanism	2,4-dinitrotoluene|Aflatoxin B1|Arsenic Trioxide|Benzo(a)pyrene|Choline|Cisplatin|Copper|Doxorubicin|Ethanol|Ethinyl Estradiol|Fenretinide|Indomethacin|Methionine|Phenobarbital|Resveratrol|Tetrachlorodibenzodioxin|Tetradecanoylphorbol Acetate|Topotecan|Troglitazone	52.71	112
PYCARD	29108	Carcinoma, Hepatocellular	MESH:D006528	marker/mechanism	4,4'-diaminodiphenylmethane|Acetaminophen|Acetylcysteine|Acrylamide|Arsenic Trioxide|Benzo(a)pyrene|cadmium telluride|Carbon Tetrachloride|Chlorodiphenyl (54% Chlorine)|Cholesterol|Choline|Cisplatin|Copper|Decitabine|Dexamethasone|Dimethylnitrosamine|Ethanol|Ethinyl Estradiol|Fenretinide|Lipopolysaccharides|Methionine|pirinixic acid|Quercetin|Resveratrol|sodium arsenite|Streptozocin|Tetrachlorodi…	52.64	81
SREBF2	6721	Carcinoma, Hepatocellular	MESH:D006528	marker/mechanism	2,6-dinitrotoluene|Acetaminophen|Aflatoxin B1|Benzo(a)pyrene|Bezafibrate|Cholesterol|Choline|Cisplatin|Clofibrate|Curcumin|Doxorubicin|Estradiol|Ethanol|Methionine|N-(2-(1,1'-bicyclopropyl)-2-ylphenyl)-3-(difluoromethyl)-1-methyl-1H-pyrazole-4-carboxamide|perfluorooctanoic acid|pirinixic acid|Plant Preparations|pyrazolanthrone|Quercetin|Resveratrol|Streptozocin|Tetrachlorodibenzodioxin|Tretinoin|…	52.09	72
INPP4B	8821	Carcinoma, Hepatocellular	MESH:D006528	marker/mechanism	1-nitropyrene|2,4-dinitrotoluene|2,6-dinitrotoluene|Aflatoxin B1|Arsenic|Benzo(a)pyrene|Cisplatin|Copper|Daunorubicin|Dexamethasone|Doxorubicin|Estradiol|Ethinyl Estradiol|Genistein|perfluorooctanoic acid|Resveratrol|sodium arsenite|Tetrachlorodibenzodioxin|Tetradecanoylphorbol Acetate|Tretinoin	51.86	66
IQGAP3	128239	Carcinoma, Hepatocellular	MESH:D006528	marker/mechanism	1,4-bis(2-(3,5-dichloropyridyloxy))benzene|Acetaminophen|Aflatoxin B1|Benzo(a)pyrene|benzo(b)fluoranthene|Carbon Tetrachloride|Choline|Cisplatin|Clofibrate|Dichloroacetic Acid|Diethylnitrosamine|Doxorubicin|Estradiol|Ethinyl Estradiol|Methionine|Phenobarbital|Plant Extracts|sodium arsenite|Tetrachlorodibenzodioxin|Topotecan|Troglitazone	51.8	215
EXO1	9156	Carcinoma, Hepatocellular	MESH:D006528	marker/mechanism	1,4-bis(2-(3,5-dichloropyridyloxy))benzene|2-amino-3,8-dimethylimidazo(4,5-f)quinoxaline|Acetaminophen|Aflatoxin B1|Azathioprine|Benzo(a)pyrene|benzo(b)fluoranthene|Carbon Tetrachloride|Choline|Cisplatin|Copper|Doxorubicin|Estradiol|Ethinyl Estradiol|Methionine|Phenobarbital|pirinixic acid|Resveratrol|sodium arsenite|Tetrachlorodibenzodioxin|Tetradecanoylphorbol Acetate|Topotecan|Troglitazone	51.75	116
NR1H2	7376	Carcinoma, Hepatocellular	MESH:D006528	marker/mechanism	2,4-dinitrotoluene|Acetaminophen|Aflatoxin B1|Arsenic|Arsenic Trioxide|Bezafibrate|Butylated Hydroxytoluene|Carbon Tetrachloride|Cholesterol|Choline|Clofibrate|Dexamethasone|Diethylhexyl Phthalate|Diethylnitrosamine|Estradiol|Lipopolysaccharides|Methionine|Pioglitazone|sodium arsenite|Streptozocin|Tetrachlorodibenzodioxin	51.52	198
ORC1	4998	Carcinoma, Hepatocellular	MESH:D006528	marker/mechanism	2-amino-3,8-dimethylimidazo(4,5-f)quinoxaline|Acrylamide|Aflatoxin B1|Azathioprine|Benzo(a)pyrene|Cisplatin|Copper|Dexamethasone|Estradiol|Ethinyl Estradiol|Irinotecan|Niclosamide|Pentachlorophenol|Quercetin|Resveratrol|sodium arsenite|Tetrachlorodibenzodioxin|Thioacetamide|Topotecan|Tretinoin|Troglitazone	51.52	69
CELSR3	1951	Carcinoma, Hepatocellular	MESH:D006528	marker/mechanism	Acetaminophen|Arsenic|Benzo(a)pyrene|Choline|Cisplatin|Copper|Dexamethasone|Doxorubicin|Drugs, Chinese Herbal|Estradiol|Ethanol|Ethinyl Estradiol|Flavonoids|Methionine|Niclosamide|Pentachlorophenol|Plant Extracts|Tetrachlorodibenzodioxin|Tretinoin	51.21	55
GPC3	2719	Carcinoma, Hepatocellular	MESH:D006528	marker/mechanism	2-Acetylaminofluorene|Acetaminophen|Acrylamide|Aflatoxin B1|Ascorbic Acid|Carbon Tetrachloride|Cisplatin|Dexamethasone|Diethylnitrosamine|Doxorubicin|Estradiol|Ethinyl Estradiol|gemcitabine|Methotrexate|Paclitaxel|perfluorooctanoic acid|Phenobarbital|pirinixic acid|Tetrachlorodibenzodioxin|Topotecan|Tretinoin	50.97	209
HGFAC	3083	Carcinoma, Hepatocellular	MESH:D006528	marker/mechanism	1,4-bis(2-(3,5-dichloropyridyloxy))benzene|2,4-dinitrotoluene|Aflatoxin B1|Arsenic|Carbon Tetrachloride|Clofibrate|Dichloroacetic Acid|Diethylnitrosamine|Dimethylnitrosamine|Fenretinide|Irinotecan|perfluorodecanoic acid|perfluoro-n-nonanoic acid|Phenobarbital|pirinixic acid|Tetrachlorodibenzodioxin	50.8	183
YTHDF2	51441	Carcinoma, Hepatocellular	MESH:D006528	marker/mechanism	2,4-dinitrotoluene|2,6-dinitrotoluene|4,4'-diaminodiphenylmethane|Acetaminophen|Arsenic Trioxide|Benzo(a)pyrene|Cisplatin|Clofibrate|Copper|Dexamethasone|Diethylnitrosamine|Ethanol|Ethinyl Estradiol|Indomethacin|Methotrexate|Tetrachlorodibenzodioxin|Tetradecanoylphorbol Acetate	50.79	194
SHH	6469	Carcinoma, Hepatocellular	MESH:D006528	marker/mechanism	Acetaminophen|Arsenic Trioxide|Benzo(a)pyrene|Cisplatin|Estradiol|Ethanol|Ethylnitrosourea|Fenretinide|Flavonoids|Fluorouracil|gemcitabine|Genistein|Lipopolysaccharides|Melitten|perfluorooctanoic acid|Phenytoin|pirinixic acid|Plant Extracts|Resveratrol|sodium arsenite|Tetrachlorodibenzodioxin|Tretinoin|Vitamin A	50.65	76
FANCD2	2177	Carcinoma, Hepatocellular	MESH:D006528	marker/mechanism	Acetaminophen|Acrylamide|Aflatoxin B1|Arsenic Trioxide|Benzo(a)pyrene|Bortezomib|Cisplatin|Curcumin|Doxorubicin|Estradiol|Ethanol|Hydroxyurea|Methotrexate|Plant Extracts|Resveratrol|sodium arsenite|Temozolomide|Tetrachlorodibenzodioxin|Thioacetamide|Topotecan|Tretinoin|Troglitazone	49.63	84
ADD1	118	Carcinoma, Hepatocellular	MESH:D006528	marker/mechanism	2,6-dinitrotoluene|Acetaminophen|Aflatoxin B1|Benzbromarone|Benzo(a)pyrene|Clofibrate|Ethanol|Ethinyl Estradiol|Ethionine|Methotrexate|nimesulide|pirinixic acid|sodium arsenite|Sodium Selenite|Tetrachlorodibenzodioxin|Tetradecanoylphorbol Acetate|Thioacetamide|Tretinoin|Vitamin E	49.5	60
APLN	8862	Carcinoma, Hepatocellular	MESH:D006528	marker/mechanism	Acetaminophen|Acrylamide|Benzo(a)pyrene|benzo(b)fluoranthene|Colchicine|Dexamethasone|Diethylnitrosamine|Estradiol|Ethanol|Ethinyl Estradiol|Fenretinide|Methotrexate|pirinixic acid|Plant Extracts|Quercetin|Resveratrol|sodium arsenite|Tetrachlorodibenzodioxin|Thalidomide|Topotecan|Troglitazone	49.41	188
CENPM	79019	Carcinoma, Hepatocellular	MESH:D006528	marker/mechanism	Acetaminophen|Aflatoxin B1|Arsenic|Benzo(a)pyrene|Carbon Tetrachloride|Cisplatin|Copper|Dichloroacetic Acid|Doxorubicin|Estradiol|Ethanol|Ethinyl Estradiol|N-(2-(1,1'-bicyclopropyl)-2-ylphenyl)-3-(difluoromethyl)-1-methyl-1H-pyrazole-4-carboxamide|Phenobarbital|pirinixic acid|Resveratrol|sodium arsenite|Tetrachlorodibenzodioxin|Topotecan	49.18	112
LRRC59	55379	Carcinoma, Hepatocellular	MESH:D006528	marker/mechanism	2,4-dinitrotoluene|2,6-dinitrotoluene|Acetaminophen|Acrylamide|Arsenic Trioxide|Carbon Tetrachloride|Cisplatin|Dexamethasone|Diethylnitrosamine|Doxorubicin|Ethanol|Indomethacin|Methyltestosterone|Phenobarbital|pirinixic acid|sodium arsenite|Tetrachlorodibenzodioxin|Thioacetamide|Trichloroethylene	49.18	210
IQGAP2	10788	Carcinoma, Hepatocellular	MESH:D006528	marker/mechanism	Acetaminophen|Aflatoxin B1|Benzo(a)pyrene|Clofibrate|Diethylnitrosamine|Ethanol|Ethinyl Estradiol|Fenretinide|Fluorouracil|Genistein|Indomethacin|perfluorooctanoic acid|Phenobarbital|Quercetin|Resveratrol|sodium arsenite|Sodium Selenite|Tetrachlorodibenzodioxin|Tetradecanoylphorbol Acetate|Tretinoin	48.88	216
IGF2BP3	10643	Carcinoma, Hepatocellular	MESH:D006528	marker/mechanism	4,4'-diaminodiphenylmethane|Aflatoxin B1|Benzo(a)pyrene|Cyclophosphamide|Dexamethasone|Dimethylnitrosamine|Doxorubicin|epigallocatechin gallate|Ethinyl Estradiol|Indomethacin|Phenobarbital|pirinixic acid|Quercetin|Resveratrol|sodium arsenite|Streptozocin|Tetrachlorodibenzodioxin|Thioacetamide|Troglitazone	48.86	95
APOF	319	Carcinoma, Hepatocellular	MESH:D006528	marker/mechanism	Acetaminophen|Aflatoxin B1|Benzo(a)pyrene|Clofibrate|cyproconazole|Dexamethasone|Diethylnitrosamine|Methotrexate|Niclosamide|Pentachlorophenol|perfluorooctanoic acid|pirinixic acid|Quercetin|sodium arsenite|Tetrachlorodibenzodioxin|Thioacetamide	48.61	177
TSLP	85480	Carcinoma, Hepatocellular	MESH:D006528	marker/mechanism	4,4'-diaminodiphenylmethane|Acetaminophen|Acetylcysteine|Acrylamide|Aflatoxin B1|Arsenic|Benzo(a)pyrene|Carbon Tetrachloride|Cisplatin|Copper|deguelin|Dexamethasone|Doxorubicin|Estradiol|Ethinyl Estradiol|Lipopolysaccharides|Phenobarbital|Plant Preparations|Tetrachlorodibenzodioxin|Tetradecanoylphorbol Acetate|Tretinoin	48.2	105
KBTBD11	9920	Carcinoma, Hepatocellular	MESH:D006528	marker/mechanism	Aflatoxin B1|Arsenic Trioxide|Benzo(a)pyrene|Cisplatin|Copper|Cyclophosphamide|Dexamethasone|Estradiol|Ethinyl Estradiol|Fenretinide|Indomethacin|Lipopolysaccharides|pirinixic acid|Plant Extracts|sodium arsenite|Sodium Selenite|Tetrachlorodibenzodioxin|Tretinoin	47.82	68
DEPDC1B	55789	Carcinoma, Hepatocellular	MESH:D006528	marker/mechanism	Acetaminophen|Aflatoxin B1|Azathioprine|benzo(b)fluoranthene|Cisplatin|Decitabine|Estradiol|Ethanol|Ethylnitrosourea|Fenretinide|Genistein|Irinotecan|Phenobarbital|Quercetin|sodium arsenite|Tetrachlorodibenzodioxin|Tetrachloroethylene|Tetradecanoylphorbol Acetate|Topotecan	47.65	93
FAM83D	81610	Carcinoma, Hepatocellular	MESH:D006528	marker/mechanism	1,4-bis(2-(3,5-dichloropyridyloxy))benzene|Acetaminophen|Acrylamide|Aflatoxin B1|Arsenic|Azathioprine|Benzo(a)pyrene|Cisplatin|Copper|Doxorubicin|Ethanol|Genistein|Niclosamide|Quercetin|sodium arsenite|Tetrachlorodibenzodioxin|Thioacetamide|Topotecan|Troglitazone	47.65	71
EAF2	55840	Carcinoma, Hepatocellular	MESH:D006528	marker/mechanism	2,6-dinitrotoluene|Acrylamide|Aflatoxin B1|Benzo(a)pyrene|Chlorodiphenyl (54% Chlorine)|Choline|cinnamic aldehyde|Cisplatin|Estradiol|Methionine|N-(2-(1,1'-bicyclopropyl)-2-ylphenyl)-3-(difluoromethyl)-1-methyl-1H-pyrazole-4-carboxamide|perfluorooctanoic acid|pirinixic acid|Plant Extracts|Quercetin|sodium arsenite|Tetrachlorodibenzodioxin|Tetradecanoylphorbol Acetate|Tretinoin	47.35	47
BRAF	673	Carcinoma, Hepatocellular	MESH:D006528	marker/mechanism	1,4-bis(2-(3,5-dichloropyridyloxy))benzene|2,6-dinitrotoluene|Acetaminophen|Arsenic|Arsenic Trioxide|Cisplatin|Diethylnitrosamine|Ethanol|Ethinyl Estradiol|gemcitabine|Lipopolysaccharides|Niclosamide|Phenobarbital|pirinixic acid|Quercetin|Resveratrol|sodium arsenite|Sodium Selenite|Sorafenib|Tamoxifen|Tretinoin|Troglitazone|Vanadium	47.3	236
PTH1R	5745	Carcinoma, Hepatocellular	MESH:D006528	marker/mechanism	Aflatoxin B1|Arsenic|Ascorbic Acid|Benzo(a)pyrene|Carbon Tetrachloride|Dexamethasone|Diethylhexyl Phthalate|Diethylnitrosamine|Estradiol|Genistein|Indomethacin|perfluorooctanoic acid|Phenobarbital|pirinixic acid|sodium arsenite|Tetrachlorodibenzodioxin|Topotecan|Tretinoin|Trichloroethylene|Troglitazone	47.3	191
CDK14	5218	Carcinoma, Hepatocellular	MESH:D006528	marker/mechanism	Acetaminophen|Acrylamide|Aflatoxin B1|Benzo(a)pyrene|Carbon Tetrachloride|Choline|Cisplatin|Dexamethasone|Drugs, Chinese Herbal|Estradiol|Ethanol|Ethinyl Estradiol|Fenretinide|Indomethacin|Methionine|Tetrachlorodibenzodioxin|Topotecan|Tretinoin	46.5	60
PAMR1	25891	Carcinoma, Hepatocellular	MESH:D006528	marker/mechanism	Acetaminophen|Acrylamide|Benzo(a)pyrene|benzo(b)fluoranthene|Cisplatin|Decitabine|Dexamethasone|Doxorubicin|Estradiol|Ethanol|Ethinyl Estradiol|Indomethacin|Plant Extracts|Plant Preparations|sodium arsenite|Tretinoin|Troglitazone	46.18	56
RTP3	83597	Carcinoma, Hepatocellular	MESH:D006528	marker/mechanism	4,4'-diaminodiphenylmethane|Acetaminophen|Acrylamide|benz(a)anthracene|Benzo(a)pyrene|benzo(b)fluoranthene|Carbon Tetrachloride|Choline|Diethylnitrosamine|Dimethylnitrosamine|Fenretinide|Methionine|N-(2-(1,1'-bicyclopropyl)-2-ylphenyl)-3-(difluoromethyl)-1-methyl-1H-pyrazole-4-carboxamide|pirinixic acid|sodium arsenite|Thioacetamide	45.83	166
KCNN2	3781	Carcinoma, Hepatocellular	MESH:D006528	marker/mechanism	Acetaminophen|Aflatoxin B1|Arsenic Trioxide|Benzo(a)pyrene|Carbon Tetrachloride|Clofibrate|Diethylhexyl Phthalate|Diethylnitrosamine|Doxorubicin|Ethanol|Fenretinide|Flavonoids|perfluorooctanoic acid|Phenobarbital|pirinixic acid|Plant Extracts|Tetrachlorodibenzodioxin|Tetradecanoylphorbol Acetate|Thioacetamide	45.7	212
TCIM	56892	Carcinoma, Hepatocellular	MESH:D006528	marker/mechanism	4,4'-diaminodiphenylmethane|Acetaminophen|Aflatoxin B1|Arsenic Trioxide|Benzo(a)pyrene|Cisplatin|Doxorubicin|Estradiol|Fenretinide|Niclosamide|perfluorooctanoic acid|Quercetin|Sodium Selenite|Tamoxifen|Temozolomide|Tetrachlorodibenzodioxin|Tretinoin	45.47	72
PLVAP	83483	Carcinoma, Hepatocellular	MESH:D006528	marker/mechanism	Acetaminophen|Benzo(a)pyrene|benzo(b)fluoranthene|Carbon Tetrachloride|Chlorodiphenyl (54% Chlorine)|Choline|Doxorubicin|Fenretinide|Lipopolysaccharides|Methionine|Methyltestosterone|Phenobarbital|pirinixic acid|Thioacetamide|Topotecan|Troglitazone	45.42	72
SKA1	220134	Carcinoma, Hepatocellular	MESH:D006528	marker/mechanism	Acetaminophen|Acrylamide|Aflatoxin B1|Arsenic|Azathioprine|benzo(b)fluoranthene|Cisplatin|Diethylnitrosamine|Ethinyl Estradiol|Iron|pirinixic acid|Quercetin|Resveratrol|sodium arsenite|Tetrachlorodibenzodioxin|Tetradecanoylphorbol Acetate|Topotecan|Tretinoin	45.28	201
MIR122	406906	Carcinoma, Hepatocellular	MESH:D006528	marker/mechanism	1,4-bis(2-(3,5-dichloropyridyloxy))benzene|Acetaminophen|Aflatoxin B1|Arsenic Trioxide|Benzo(a)pyrene|Carbon Tetrachloride|Choline|Cisplatin|Clofibrate|Decitabine|Doxorubicin|Drugs, Chinese Herbal|epigallocatechin gallate|Methionine|Phenobarbital|Resveratrol|Sirolimus|Tetrachlorodibenzodioxin	44.99	107
PKMYT1	9088	Carcinoma, Hepatocellular	MESH:D006528	marker/mechanism	1,4-bis(2-(3,5-dichloropyridyloxy))benzene|2,6-dinitrotoluene|Acetaminophen|Acrylamide|Aflatoxin B1|Arsenic Trioxide|Benzo(a)pyrene|Cisplatin|Ethinyl Estradiol|Fenretinide|Phenobarbital|pirinixic acid|Plant Extracts|Quercetin|sodium arsenite|Tetrachlorodibenzodioxin|Tetradecanoylphorbol Acetate|Troglitazone	44.7	105
TRAIP	10293	Carcinoma, Hepatocellular	MESH:D006528	marker/mechanism	1,4-bis(2-(3,5-dichloropyridyloxy))benzene|Acetaminophen|Benzo(a)pyrene|Carbon Tetrachloride|Choline|Cisplatin|Dichloroacetic Acid|Estradiol|Ethanol|Methionine|Methotrexate|pirinixic acid|sodium arsenite|Tetrachlorodibenzodioxin|Tetradecanoylphorbol Acetate|Topotecan|Trichloroethylene	44.47	49
PPP1R1A	5502	Carcinoma, Hepatocellular	MESH:D006528	marker/mechanism	Acetaminophen|Aflatoxin B1|Benzo(a)pyrene|Dexamethasone|Estradiol|Ethinyl Estradiol|Fenretinide|Flavonoids|Indomethacin|N-nitrosomorpholine|perfluorooctanoic acid|Plant Extracts|Quercetin|sodium arsenite|Tetrachlorodibenzodioxin|Thalidomide|Tretinoin|Troglitazone	44.42	63
MARCO	8685	Carcinoma, Hepatocellular	MESH:D006528	marker/mechanism	Acetaminophen|Aflatoxin B1|benz(a)anthracene|Benzo(a)pyrene|benzo(b)fluoranthene|Carbon Tetrachloride|Cholesterol|Cisplatin|Decitabine|Diethylhexyl Phthalate|Drugs, Chinese Herbal|Ethinyl Estradiol|Lipopolysaccharides|pirinixic acid|Tamoxifen|Tetrachlorodibenzodioxin|Tetradecanoylphorbol Acetate|Thioacetamide	44.14	75
CSRNP1	64651	Carcinoma, Hepatocellular	MESH:D006528	marker/mechanism	Acetaminophen|Acrylamide|Benzo(a)pyrene|benzo(b)fluoranthene|Cisplatin|Copper|Doxorubicin|Estradiol|Ethinyl Estradiol|Fenretinide|Methyltestosterone|N-(2-(1,1'-bicyclopropyl)-2-ylphenyl)-3-(difluoromethyl)-1-methyl-1H-pyrazole-4-carboxamide|Niclosamide|Phenobarbital|pirinixic acid|Tetrachlorodibenzodioxin|Tetrachloroethylene|Topotecan|Troglitazone	43.96	88
ASPG	374569	Carcinoma, Hepatocellular	MESH:D006528	marker/mechanism	Acetaminophen|Aflatoxin B1|benzo(b)fluoranthene|Carbon Tetrachloride|Cisplatin|Copper|Diethylnitrosamine|Ethinyl Estradiol|Fenretinide|nimesulide|Phenobarbital|pirinixic acid|Plant Extracts|sodium arsenite|Tetrachlorodibenzodioxin|Thioacetamide|Troglitazone	43.83	208
COPS5	10987	Carcinoma, Hepatocellular	MESH:D006528	marker/mechanism	2,4-dinitrotoluene|Acetaminophen|Arsenic Trioxide|Benzo(a)pyrene|Cisplatin|Ethinyl Estradiol|Indomethacin|nimesulide|pirinixic acid|Plant Extracts|Quercetin|sodium arsenite|Sodium Selenite|Tetrachlorodibenzodioxin|Tetradecanoylphorbol Acetate	43.57	54
RUNX3	864	Carcinoma, Hepatocellular	MESH:D006528	marker/mechanism	4,4'-diaminodiphenylmethane|Acetaminophen|Aflatoxin B1|Arsenic|Azacitidine|Benzo(a)pyrene|Cisplatin|Cyclophosphamide|Decitabine|Diethylnitrosamine|Doxorubicin|Estradiol|Ethinyl Estradiol|Flavonoids|sodium arsenite|Sodium Selenite|Tetrachlorodibenzodioxin|Tretinoin	43.08	199
PKP1	5317	Carcinoma, Hepatocellular	MESH:D006528	marker/mechanism	2-Acetylaminofluorene|4,4'-diaminodiphenylmethane|Acrylamide|Aflatoxin B1|Arsenic Trioxide|Benzo(a)pyrene|Choline|Dexamethasone|Dichloroacetic Acid|Diethylhexyl Phthalate|Estradiol|Methionine|Methotrexate|pirinixic acid|Tetrachlorodibenzodioxin	42.72	51
ARID2	196528	Carcinoma, Hepatocellular	MESH:D006528	marker/mechanism	2,4-dinitrotoluene|2,6-dinitrotoluene|Acetaminophen|Aflatoxin B1|Benzo(a)pyrene|Cisplatin|Dexamethasone|Doxorubicin|Ethanol|Ethinyl Estradiol|Indomethacin|Irinotecan|pirinixic acid|Quercetin|Tetrachlorodibenzodioxin|Topotecan|Troglitazone	42.62	62
PNPT1	87178	Carcinoma, Hepatocellular	MESH:D006528	marker/mechanism	Acetaminophen|Aflatoxin B1|Benzo(a)pyrene|epigallocatechin gallate|Estradiol|Ethanol|Genistein|Lipopolysaccharides|Pentachlorophenol|perfluorooctanoic acid|pirinixic acid|Plant Extracts|Streptozocin|Tamoxifen|Tetrachlorodibenzodioxin|Tetradecanoylphorbol Acetate	42.44	52
DEPDC1	55635	Carcinoma, Hepatocellular	MESH:D006528	marker/mechanism	Acetaminophen|Aflatoxin B1|Arsenic Trioxide|Azathioprine|Benzo(a)pyrene|Cisplatin|Copper|Dexamethasone|Doxorubicin|Estradiol|Indomethacin|Methotrexate|Quercetin|Resveratrol|sodium arsenite|Tetrachlorodibenzodioxin|Topotecan	42.33	74
KIF18A	81930	Carcinoma, Hepatocellular	MESH:D006528	marker/mechanism	Acetaminophen|Acrylamide|Aflatoxin B1|Azathioprine|Choline|Cisplatin|Diethylhexyl Phthalate|Doxorubicin|epigallocatechin gallate|Estradiol|Ethinyl Estradiol|Methionine|Quercetin|Resveratrol|sodium arsenite|Tetrachlorodibenzodioxin|Tetradecanoylphorbol Acetate|Topotecan	42.08	71
ANGPTL6	83854	Carcinoma, Hepatocellular	MESH:D006528	marker/mechanism	Acetaminophen|Acrylamide|Aflatoxin B1|Benzo(a)pyrene|Carbon Tetrachloride|Choline|Cisplatin|Estrogens|Methionine|Pentachlorophenol|Phenobarbital|Plant Extracts|Sirolimus|sodium arsenite|Tetrachlorodibenzodioxin	41.92	82
CENPW	387103	Carcinoma, Hepatocellular	MESH:D006528	marker/mechanism	Acetaminophen|Aflatoxin B1|Carbon Tetrachloride|Cisplatin|Copper|Dexamethasone|Dichloroacetic Acid|Estradiol|Indomethacin|Phenobarbital|pirinixic acid|Quercetin|Resveratrol|sodium arsenite|Tetradecanoylphorbol Acetate|Topotecan|Tretinoin	41.78	93
HSD3B2	3284	Carcinoma, Hepatocellular	MESH:D006528	marker/mechanism	1,4-bis(2-(3,5-dichloropyridyloxy))benzene|2,2-bis(bromomethyl)-1,3-propanediol|Acetaminophen|Arsenic Trioxide|Carbon Tetrachloride|Clofibrate|Copper|Diethylhexyl Phthalate|Diethylnitrosamine|Doxorubicin|Drugs, Chinese Herbal|Ethanol|Ethinyl Estradiol|Hexachlorocyclohexane|Octreotide|Phenobarbital|Pioglitazone|pirinixic acid|Plant Extracts|Quercetin|Tetrachlorodibenzodioxin|Troglitazone	41.58	209
NEIL3	55247	Carcinoma, Hepatocellular	MESH:D006528	marker/mechanism	1,4-bis(2-(3,5-dichloropyridyloxy))benzene|Acetaminophen|Aflatoxin B1|Benzo(a)pyrene|Choline|Cisplatin|Decitabine|epigallocatechin gallate|Estradiol|Ethinyl Estradiol|Methionine|Methotrexate|Resveratrol|sodium arsenite|Tetrachlorodibenzodioxin|Tetradecanoylphorbol Acetate|Troglitazone	41.24	62
GINS1	9837	Carcinoma, Hepatocellular	MESH:D006528	marker/mechanism	Acetaminophen|Aflatoxin B1|Azathioprine|Cisplatin|Copper|epigallocatechin gallate|Estradiol|Ethinyl Estradiol|Fluorouracil|Genistein|Phenobarbital|pirinixic acid|Resveratrol|sodium arsenite|Tetradecanoylphorbol Acetate|Thioacetamide|Topotecan|Tretinoin	41.14	110
JDP2	122953	Carcinoma, Hepatocellular	MESH:D006528	marker/mechanism	4,4'-diaminodiphenylmethane|Acetaminophen|Aflatoxin B1|Benzo(a)pyrene|Cisplatin|Copper|Dexamethasone|Dichloroacetic Acid|Dimethylnitrosamine|Estradiol|Indomethacin|Phenobarbital|Quercetin|Resveratrol|sodium arsenite|Tetrachlorodibenzodioxin|Tetradecanoylphorbol Acetate|Topotecan	40.46	90
TMEM70	54968	Carcinoma, Hepatocellular	MESH:D006528	marker/mechanism	Acetaminophen|Arsenic Trioxide|Carbon Tetrachloride|Diethylnitrosamine|Doxorubicin|Ethinyl Estradiol|Phenobarbital|pirinixic acid|Plant Extracts|Resveratrol|Tetrachlorodibenzodioxin|Tetradecanoylphorbol Acetate|Thioacetamide|Tretinoin	40.44	198
CKAP2L	150468	Carcinoma, Hepatocellular	MESH:D006528	marker/mechanism	1,4-bis(2-(3,5-dichloropyridyloxy))benzene|Acetaminophen|Aflatoxin B1|Benzo(a)pyrene|benzo(b)fluoranthene|Carbon Tetrachloride|Choline|Dichloroacetic Acid|Doxorubicin|Ethinyl Estradiol|Methionine|Phenobarbital|Resveratrol|sodium arsenite|Tetrachlorodibenzodioxin|Tretinoin	39.68	95
AXIN1	8312	Carcinoma, Hepatocellular	MESH:D006528	marker/mechanism	2,4-dinitrotoluene|Acetaminophen|Arsenic|Choline|Cisplatin|Curcumin|Decitabine|Doxorubicin|Estradiol|Lipopolysaccharides|Phenobarbital|sodium arsenite|Sodium Selenite|tamibarotene|Tretinoin	39.43	76
UROC1	131669	Carcinoma, Hepatocellular	MESH:D006528	marker/mechanism	Acetaminophen|Aflatoxin B1|Benzo(a)pyrene|Carbon Tetrachloride|Clofibrate|Dexamethasone|Ethanol|Ethinyl Estradiol|Genistein|perfluorooctanoic acid|Phenobarbital|sodium arsenite|Tamoxifen|Thioacetamide	39.22	103
KMT2B	9757	Carcinoma, Hepatocellular	MESH:D006528	marker/mechanism	Aflatoxin B1|Choline|Decitabine|Doxorubicin|Estradiol|Ethylnitrosourea|Methionine|sodium arsenite|tamibarotene|Tetrachlorodibenzodioxin|Tetradecanoylphorbol Acetate|Tretinoin|Troglitazone|Vitamin E	38.84	41
CYP2C8	1558	Carcinoma, Hepatocellular	MESH:D006528	marker/mechanism	2-amino-3,8-dimethylimidazo(4,5-f)quinoxaline|Acetaminophen|Aflatoxin B1|Bezafibrate|Chlorodiphenyl (54% Chlorine)|Cyclophosphamide|Dexamethasone|Estradiol|Ethinyl Estradiol|Methyltestosterone|Paclitaxel|Phenobarbital|Pioglitazone|pirinixic acid|Plant Extracts|Quercetin|Resveratrol|sodium arsenite|Tamoxifen|Tetrachlorodibenzodioxin|Tetrachloroethylene|Tretinoin|Troglitazone	38.71	113
EPS8L3	79574	Carcinoma, Hepatocellular	MESH:D006528	marker/mechanism	2-amino-3,8-dimethylimidazo(4,5-f)quinoxaline|Acetaminophen|Aflatoxin B1|Benzo(a)pyrene|Choline|Cisplatin|Copper|Diethylhexyl Phthalate|Ethinyl Estradiol|Methionine|Niclosamide|sodium arsenite|Tetrachlorodibenzodioxin	38.64	54
CD274	29126	Carcinoma, Hepatocellular	MESH:D006528	marker/mechanism	4,4'-diaminodiphenylmethane|Acetaminophen|Aflatoxin B1|Benzo(a)pyrene|cinnamic aldehyde|Cisplatin|Dexamethasone|Doxorubicin|Fluorouracil|Lipopolysaccharides|Methotrexate|Paclitaxel|Pentachlorophenol|Phenobarbital|sodium arsenite|Tetrachlorodibenzodioxin|Tetradecanoylphorbol Acetate|Thioacetamide	38.6	101
GNAO1	2775	Carcinoma, Hepatocellular	MESH:D006528	marker/mechanism	Acrylamide|Aflatoxin B1|Arsenic|Benzo(a)pyrene|Copper|Dexamethasone|Estradiol|Ethanol|Ethinyl Estradiol|Flavonoids|Genistein|Lipopolysaccharides|Phenobarbital|pirinixic acid|Quercetin|Tamoxifen|Tetradecanoylphorbol Acetate	38.56	95
CPEB3	22849	Carcinoma, Hepatocellular	MESH:D006528	marker/mechanism	Aflatoxin B1|Arsenic|Benzo(a)pyrene|Cisplatin|Clofibrate|Copper|Dexamethasone|Doxorubicin|Drugs, Chinese Herbal|Ethanol|Ethinyl Estradiol|Phenobarbital|sodium arsenite|Tetrachlorodibenzodioxin|Troglitazone	37.89	102
HERC5	51191	Carcinoma, Hepatocellular	MESH:D006528	marker/mechanism	Acetaminophen|Aflatoxin B1|Azathioprine|Benzo(a)pyrene|Cisplatin|Decitabine|Diethylhexyl Phthalate|Doxorubicin|Estradiol|Lipopolysaccharides|Phenobarbital|Plant Extracts|Prednisolone|Tetrachlorodibenzodioxin|Tetradecanoylphorbol Acetate|Trichloroethylene	37.85	89
GPM6A	2823	Carcinoma, Hepatocellular	MESH:D006528	marker/mechanism	Aflatoxin B1|Arsenic Trioxide|Benzo(a)pyrene|Diethylhexyl Phthalate|Diethylnitrosamine|Diethylstilbestrol|Doxorubicin|Estradiol|Ethanol|Ethinyl Estradiol|Fenretinide|Phenobarbital|Phenytoin|Pioglitazone|Tamoxifen|Tetrachlorodibenzodioxin	37.36	222
COLEC10	10584	Carcinoma, Hepatocellular	MESH:D006528	marker/mechanism	Acetaminophen|Aflatoxin B1|Arsenic Trioxide|Benzo(a)pyrene|Carbon Tetrachloride|Diethylnitrosamine|Niclosamide|Phenobarbital|pirinixic acid|sodium arsenite|Tetrachloroethylene	37.29	190
MBTPS1	8720	Carcinoma, Hepatocellular	MESH:D006528	marker/mechanism	Cisplatin|Dexamethasone|dicyclanil|Doxorubicin|Ethanol|Ethinyl Estradiol|Flavonoids|Indomethacin|Lipopolysaccharides|pirinixic acid|Resveratrol|Tetrachlorodibenzodioxin|Tretinoin|Troglitazone	36.75	49
VIPR1	7433	Carcinoma, Hepatocellular	MESH:D006528	marker/mechanism	4,4'-diaminodiphenylmethane|Acetaminophen|Aflatoxin B1|Benzo(a)pyrene|Carbon Tetrachloride|Cyclophosphamide|Diethylnitrosamine|Dimethylnitrosamine|Estradiol|Methotrexate|nimesulide|pirinixic acid|Quercetin|Tetrachlorodibenzodioxin|Tretinoin|Troglitazone	36.66	175
NOTCH3	4854	Carcinoma, Hepatocellular	MESH:D006528	marker/mechanism	Acetaminophen|Aflatoxin B1|Benzo(a)pyrene|cinnamic aldehyde|Cisplatin|Copper|Diethylhexyl Phthalate|Estradiol|Ethanol|Ethinyl Estradiol|Fenretinide|Lipopolysaccharides|Methotrexate|Tamoxifen|Tetrachlorodibenzodioxin|Tetradecanoylphorbol Acetate|Troglitazone	36.47	75
CEP131	22994	Carcinoma, Hepatocellular	MESH:D006528	marker/mechanism	4,4'-diaminodiphenylmethane|Acetaminophen|Arsenic|Benzo(a)pyrene|Cisplatin|Dexamethasone|Estradiol|Ethinyl Estradiol|Indomethacin|Methyltestosterone|pirinixic acid|Tetrachlorodibenzodioxin	36.43	41
WDR62	284403	Carcinoma, Hepatocellular	MESH:D006528	marker/mechanism	Acetaminophen|Aflatoxin B1|Cisplatin|Dexamethasone|Doxorubicin|Ethinyl Estradiol|Indomethacin|pirinixic acid|Plant Extracts|sodium arsenite|Tamoxifen|Tetrachlorodibenzodioxin|Tetrachloroethylene|Thioacetamide	36.43	75
ZIC2	7546	Carcinoma, Hepatocellular	MESH:D006528	marker/mechanism	Acetaminophen|Aflatoxin B1|Benzo(a)pyrene|Cisplatin|Copper|Estradiol|Ethinyl Estradiol|Ethylnitrosourea|Niclosamide|Plant Extracts|Quercetin|Sirolimus|Tetrachlorodibenzodioxin|Tretinoin	36.43	52
MT1E	4493	Carcinoma, Hepatocellular	MESH:D006528	marker/mechanism	Acetylcysteine|Aflatoxin B1|Arsenic Trioxide|Benzo(a)pyrene|benzo(b)fluoranthene|Cisplatin|Copper|Dexamethasone|Doxorubicin|Estradiol|Fluorouracil|Lipopolysaccharides|Niclosamide|Paclitaxel|Plant Extracts|Sirolimus|sodium arsenite|Tetrachlorodibenzodioxin	36.23	74
SCAP	22937	Carcinoma, Hepatocellular	MESH:D006528	marker/mechanism	2,6-dinitrotoluene|Arsenic|Benzo(a)pyrene|Bezafibrate|cyproconazole|Diethylhexyl Phthalate|Doxorubicin|Ethanol|perfluorooctanoic acid|pirinixic acid|Resveratrol|sodium arsenite|Tetrachlorodibenzodioxin	36.14	40
CAP2	10486	Carcinoma, Hepatocellular	MESH:D006528	marker/mechanism	Acetaminophen|Acrylamide|Benzo(a)pyrene|Cisplatin|Clofibrate|Copper|Doxorubicin|Estrogens|Ethanol|Fluorouracil|Methotrexate|Phenobarbital|Resveratrol|Tamoxifen|Tetrachlorodibenzodioxin	35.73	110
ARID1A	8289	Carcinoma, Hepatocellular	MESH:D006528	marker/mechanism	2,4-dinitrotoluene|2,6-dinitrotoluene|Acetaminophen|Aflatoxin B1|Arsenic Trioxide|Choline|Cisplatin|Clofibrate|Ethanol|Indomethacin|Methionine|Methotrexate|perfluorooctanoic acid|Phenobarbital|Plant Extracts|Troglitazone	35.57	99
HJURP	55355	Carcinoma, Hepatocellular	MESH:D006528	marker/mechanism	Acetaminophen|Aflatoxin B1|Arsenic|Cisplatin|Copper|Diethylhexyl Phthalate|Doxorubicin|Estradiol|Phenobarbital|pirinixic acid|Resveratrol|sodium arsenite|Tetrachlorodibenzodioxin|Tetradecanoylphorbol Acetate|Tretinoin	35.24	94
CYP4A11	1579	Carcinoma, Hepatocellular	MESH:D006528	marker/mechanism	Acetylcysteine|Aflatoxin B1|Bezafibrate|Chlorodiphenyl (54% Chlorine)|Cisplatin|Clofibrate|Methotrexate|perfluoro-n-nonanoic acid|perfluorooctanoic acid|Phenobarbital|pirinixic acid|sodium arsenite|Tretinoin|Vitamin A	34.95	77
FGF4	2249	Carcinoma, Hepatocellular	MESH:D006528	marker/mechanism	Acetaminophen|Choline|Copper|Decitabine|Dexamethasone|Estradiol|Ethanol|Fluorouracil|Indomethacin|Methionine|Pentachlorophenol|Resveratrol|Thalidomide|Tretinoin	34.95	44
MT1F	4494	Carcinoma, Hepatocellular	MESH:D006528	marker/mechanism	Acetaminophen|Acetylcysteine|Arsenic|Arsenic Trioxide|Benzo(a)pyrene|Cisplatin|Clofibrate|Copper|Decitabine|Estradiol|Lipopolysaccharides|Niclosamide|Plant Extracts|sodium arsenite|Sodium Selenite|Temozolomide|Tetrachlorodibenzodioxin	34.47	54
EIF3H	8667	Carcinoma, Hepatocellular	MESH:D006528	marker/mechanism	4,4'-diaminodiphenylmethane|Benzo(a)pyrene|Diethylnitrosamine|Doxorubicin|Ethanol|Ethinyl Estradiol|Fluorouracil|Methyltestosterone|N-nitrosomorpholine|perfluorooctanoic acid|Sodium Selenite|Tetrachlorodibenzodioxin	33.44	192
VSIG4	11326	Carcinoma, Hepatocellular	MESH:D006528	marker/mechanism	Acetaminophen|Aflatoxin B1|Arsenic Trioxide|Benzo(a)pyrene|Carbon Tetrachloride|Diethylnitrosamine|Fenretinide|Lipopolysaccharides|Phenobarbital|sodium arsenite|Tetrachlorodibenzodioxin|Tetradecanoylphorbol Acetate	33.44	194
PITX1	5307	Carcinoma, Hepatocellular	MESH:D006528	marker/mechanism	Aflatoxin B1|Cisplatin|Dexamethasone|dicyclanil|Diethylnitrosamine|Doxorubicin|Estradiol|Ethinyl Estradiol|Genistein|Tetrachlorodibenzodioxin|Tretinoin|Vitamin E	33.07	186
IGF2BP1	10642	Carcinoma, Hepatocellular	MESH:D006528	marker/mechanism	4,4'-diaminodiphenylmethane|Acetaminophen|Aflatoxin B1|Arsenic|Benzo(a)pyrene|Cisplatin|Dexamethasone|Diethylhexyl Phthalate|Estradiol|Indomethacin|Lipopolysaccharides|sodium arsenite|Tetrachlorodibenzodioxin	32.58	46
DNAJC6	9829	Carcinoma, Hepatocellular	MESH:D006528	marker/mechanism	Acetaminophen|Arsenic|Diethylhexyl Phthalate|Doxorubicin|Estradiol|Ethanol|Ethinyl Estradiol|Fenretinide|Methotrexate|Methyltestosterone|Phenobarbital|Sirolimus|sodium arsenite	32.3	83
MICA	100507436	Carcinoma, Hepatocellular	MESH:D006528	marker/mechanism	Acetaminophen|Arsenic|Arsenic Trioxide|Cisplatin|Decitabine|Doxorubicin|Fluorouracil|Gefitinib|Phenobarbital|Resveratrol|sodium arsenite|Sulfasalazine	32.03	95
TTC36	143941	Carcinoma, Hepatocellular	MESH:D006528	marker/mechanism	4,4'-diaminodiphenylmethane|Aflatoxin B1|Benzo(a)pyrene|Carbon Tetrachloride|Diethylnitrosamine|Dimethylnitrosamine|Fenretinide|pirinixic acid|Tetrachlorodibenzodioxin|Tetrachloroethylene|Thioacetamide|Tretinoin	32.03	168
OIT3	170392	Carcinoma, Hepatocellular	MESH:D006528	marker/mechanism	4,4'-diaminodiphenylmethane|Acetaminophen|Benzo(a)pyrene|Choline|Clofibrate|Methionine|Phenobarbital|Plant Extracts|sodium arsenite|Tetrachlorodibenzodioxin|Troglitazone	31.92	62
CCBE1	147372	Carcinoma, Hepatocellular	MESH:D006528	marker/mechanism	Aflatoxin B1|benz(a)anthracene|Benzo(a)pyrene|benzo(b)fluoranthene|Carbon Tetrachloride|Cisplatin|Estradiol|Methotrexate|Phenobarbital|Sodium Selenite|Tetrachlorodibenzodioxin|Tetradecanoylphorbol Acetate|Tretinoin	31.5	73
CNDP1	84735	Carcinoma, Hepatocellular	MESH:D006528	marker/mechanism	4,4'-diaminodiphenylmethane|Acetaminophen|Acrylamide|Aflatoxin B1|Benzo(a)pyrene|Chlorodiphenyl (54% Chlorine)|Copper|Methotrexate|Plant Extracts|Sodium Selenite|Topotecan|Tretinoin	31.39	34
FGF19	9965	Carcinoma, Hepatocellular	MESH:D006528	marker/mechanism	Aflatoxin B1|Arsenic|Cholic Acid|Estradiol|Methotrexate|pyrazolanthrone|sodium arsenite|Tetrachlorodibenzodioxin|Thalidomide|Tretinoin|Triglycerides|Ursodeoxycholic Acid	31.39	32
MBTPS2	51360	Carcinoma, Hepatocellular	MESH:D006528	marker/mechanism	Acrylamide|Aflatoxin B1|Carbon Tetrachloride|Dexamethasone|Doxorubicin|Ethinyl Estradiol|Hexachlorocyclohexane|pirinixic acid|sodium arsenite|Tetrachlorodibenzodioxin|Thioacetamide	30.73	51
STAB2	55576	Carcinoma, Hepatocellular	MESH:D006528	marker/mechanism	Acetaminophen|Aflatoxin B1|Benzo(a)pyrene|benzo(b)fluoranthene|Ethanol|Pentachlorophenol|Phenobarbital|pirinixic acid|Plant Extracts|sodium arsenite|Tetrachlorodibenzodioxin|Topotecan	30.49	73
FAM111B	374393	Carcinoma, Hepatocellular	MESH:D006528	marker/mechanism	Aflatoxin B1|Azathioprine|Cisplatin|Doxorubicin|Estradiol|Methotrexate|Niclosamide|Resveratrol|sodium arsenite|Sodium Selenite|Tetrachlorodibenzodioxin|Tretinoin	29.93	52
PARK7	11315	Carcinoma, Hepatocellular	MESH:D006528	marker/mechanism	Acetaminophen|Acetylcysteine|Cisplatin|Copper|Dexamethasone|Doxorubicin|epigallocatechin gallate|Flavonoids|Indomethacin|Lipopolysaccharides|Meloxicam|N-nitrosomorpholine|Pentachlorophenol|Quercetin|Sodium Selenite|Tetrachlorodibenzodioxin	29.62	51
LRRC1	55227	Carcinoma, Hepatocellular	MESH:D006528	marker/mechanism	Aflatoxin B1|Arsenic|Choline|Dexamethasone|Estradiol|Ethanol|Fenretinide|Indomethacin|Methionine|Tetrachlorodibenzodioxin|Tretinoin	29.34	34
MOGAT2	80168	Carcinoma, Hepatocellular	MESH:D006528	marker/mechanism	Acetaminophen|Benzo(a)pyrene|Choline|Clofibrate|Fenretinide|Methionine|perfluorooctanoic acid|pirinixic acid|Quercetin|Tamoxifen|Tetrachlorodibenzodioxin	29.02	36
CLEC1B	51266	Carcinoma, Hepatocellular	MESH:D006528	marker/mechanism	Acetaminophen|benzo(b)fluoranthene|Carbon Tetrachloride|Diethylnitrosamine|Lipopolysaccharides|Phenobarbital|Sodium Selenite|Tetrachlorodibenzodioxin|Tetradecanoylphorbol Acetate|Topotecan	28.8	166
RSPO3	84870	Carcinoma, Hepatocellular	MESH:D006528	marker/mechanism	Aflatoxin B1|Benzo(a)pyrene|Carbon Tetrachloride|Chlorodiphenyl (54% Chlorine)|Cisplatin|Copper|Diethylnitrosamine|Fenretinide|Phenobarbital|pirinixic acid|Quercetin|Tetrachlorodibenzodioxin	28.64	188
FBXL18	80028	Carcinoma, Hepatocellular	MESH:D006528	marker/mechanism	Arsenic|Benzo(a)pyrene|Cisplatin|Estrogens|Ethanol|Indomethacin|Plant Extracts|Tetrachlorodibenzodioxin|Thioacetamide	28.4	33
HOTAIR	100124700	Carcinoma, Hepatocellular	MESH:D006528	marker/mechanism	Aflatoxin B1|Arsenic|Cisplatin|Diethylstilbestrol|Doxorubicin|Estradiol|Plant Extracts|sodium arsenite|Tetrachlorodibenzodioxin	27.89	47
GPR182	11318	Carcinoma, Hepatocellular	MESH:D006528	marker/mechanism	1,4-bis(2-(3,5-dichloropyridyloxy))benzene|4,4'-diaminodiphenylmethane|Acetaminophen|benzo(b)fluoranthene|Fenretinide|Phenobarbital|pirinixic acid|Tetrachlorodibenzodioxin|Topotecan|Tretinoin|Troglitazone	27.83	55
WDR76	79968	Carcinoma, Hepatocellular	MESH:D006528	marker/mechanism	Acrylamide|Arsenic Trioxide|Benzo(a)pyrene|Cisplatin|Copper|Doxorubicin|Ethanol|Ethinyl Estradiol|Methotrexate|Methyltestosterone|sodium arsenite|Tetrachlorodibenzodioxin	27.7	59
SLC26A6	65010	Carcinoma, Hepatocellular	MESH:D006528	marker/mechanism	Acetaminophen|Aflatoxin B1|Benzo(a)pyrene|benzo(b)fluoranthene|Dexamethasone|Doxorubicin|Estradiol|Indomethacin|Phenobarbital|pirinixic acid|Tetrachlorodibenzodioxin	27.55	68
OLFML2A	169611	Carcinoma, Hepatocellular	MESH:D006528	marker/mechanism	Aflatoxin B1|Arsenic Trioxide|Dexamethasone|Diethylnitrosamine|Doxorubicin|Estradiol|Ethanol|Indomethacin|Lipopolysaccharides|Methyltestosterone|pirinixic acid|Tretinoin	27.48	190
HOXA10	3206	Carcinoma, Hepatocellular	MESH:D006528	marker/mechanism	Aflatoxin B1|Cisplatin|Diethylstilbestrol|Estradiol|Estrogens|Ethinyl Estradiol|Genistein|sodium arsenite|Tetrachlorodibenzodioxin|Topotecan|Tretinoin	27.02	48
CLEC4G	339390	Carcinoma, Hepatocellular	MESH:D006528	marker/mechanism	Acetaminophen|benz(a)anthracene|Benzo(a)pyrene|benzo(b)fluoranthene|Diethylhexyl Phthalate|Methotrexate|Phenobarbital|pirinixic acid|Tetrachlorodibenzodioxin	26.94	51
GDF2	2658	Carcinoma, Hepatocellular	MESH:D006528	marker/mechanism	4,4'-diaminodiphenylmethane|Acrylamide|Carbon Tetrachloride|Doxorubicin|Lipopolysaccharides|pirinixic acid|Plant Extracts|sodium arsenite|Tetrachlorodibenzodioxin|Tretinoin	26.65	32
ARHGEF39	84904	Carcinoma, Hepatocellular	MESH:D006528	marker/mechanism	1,4-bis(2-(3,5-dichloropyridyloxy))benzene|Acetaminophen|Benzo(a)pyrene|Drugs, Chinese Herbal|Estradiol|Irinotecan|Plant Extracts|sodium arsenite|Tetrachlorodibenzodioxin|Tetradecanoylphorbol Acetate|Trichloroethylene	26.27	22
KDM8	79831	Carcinoma, Hepatocellular	MESH:D006528	marker/mechanism	Acetaminophen|Benzo(a)pyrene|Choline|Diethylstilbestrol|Ethinyl Estradiol|Methionine|pirinixic acid|sodium arsenite|Tetrachlorodibenzodioxin	25.32	30
MRO	83876	Carcinoma, Hepatocellular	MESH:D006528	marker/mechanism	4,4'-diaminodiphenylmethane|Acetaminophen|Acrylamide|Benzbromarone|Clofibrate|Diethylstilbestrol|Dimethylnitrosamine|Ethionine|pirinixic acid|Thioacetamide	25.17	27
DNASE1L3	1776	Carcinoma, Hepatocellular	MESH:D006528	marker/mechanism	4,4'-diaminodiphenylmethane|Acetaminophen|Aflatoxin B1|Paclitaxel|perfluorooctanoic acid|Phenobarbital|pirinixic acid|Quercetin|Tetrachlorodibenzodioxin|Tetrachloroethylene|Tetradecanoylphorbol Acetate|Troglitazone	24.45	69
ADRA1A	148	Carcinoma, Hepatocellular	MESH:D006528	marker/mechanism	4,4'-diaminodiphenylmethane|Acetaminophen|Aflatoxin B1|Dichloroacetic Acid|Diethylhexyl Phthalate|Doxorubicin|Drugs, Chinese Herbal|Ethanol|pirinixic acid|sodium arsenite|Streptozocin|Tetrachlorodibenzodioxin|Tetradecanoylphorbol Acetate|Troglitazone	24.39	52
CETP	1071	Carcinoma, Hepatocellular	MESH:D006528	marker/mechanism	Aflatoxin B1|Arsenic Trioxide|Bezafibrate|Chlorodiphenyl (54% Chlorine)|Cholesterol|Estradiol|Ethanol|Methyltestosterone|sodium arsenite|Tretinoin|Triglycerides	24.31	45
ATP5PD	10476	Carcinoma, Hepatocellular	MESH:D006528	marker/mechanism	Doxorubicin|Drugs, Chinese Herbal|Estradiol|Ethanol|Indomethacin|Pentachlorophenol|sodium arsenite|Sodium Selenite|Tetradecanoylphorbol Acetate	23.96	28
FATE1	89885	Carcinoma, Hepatocellular	MESH:D006528	marker/mechanism	Acetaminophen|Aflatoxin B1|Benzo(a)pyrene|Chlorodiphenyl (54% Chlorine)|Decitabine|Tetrachlorodibenzodioxin	23.88	22
ADAMTS13	11093	Carcinoma, Hepatocellular	MESH:D006528	marker/mechanism	Aflatoxin B1|Benzo(a)pyrene|Carbon Tetrachloride|Cisplatin|Dimethylnitrosamine|Lipopolysaccharides|Paclitaxel|sodium arsenite	23.79	42
GNAZ	2781	Carcinoma, Hepatocellular	MESH:D006528	marker/mechanism	4,4'-diaminodiphenylmethane|Aflatoxin B1|Benzo(a)pyrene|Dexamethasone|Ethanol|Ethinyl Estradiol|pirinixic acid|sodium arsenite|Tetrachlorodibenzodioxin|Tretinoin|Vitamin E	23.73	41
KIF18B	146909	Carcinoma, Hepatocellular	MESH:D006528	marker/mechanism	1,4-bis(2-(3,5-dichloropyridyloxy))benzene|Acetaminophen|Acrylamide|Aflatoxin B1|Benzo(a)pyrene|Carbon Tetrachloride|Copper|Ethinyl Estradiol|Methotrexate|Phenobarbital|Tetrachlorodibenzodioxin	23.73	77
ADRA2B	151	Carcinoma, Hepatocellular	MESH:D006528	marker/mechanism	Acetaminophen|Aflatoxin B1|Arsenic Trioxide|Benzo(a)pyrene|Carbon Tetrachloride|Diethylhexyl Phthalate|Ethylnitrosourea|Plant Extracts|sodium arsenite|Tamoxifen	23	64
DEPDC5	9681	Carcinoma, Hepatocellular	MESH:D006528	marker/mechanism	Acetaminophen|Acrylamide|Aflatoxin B1|Benzo(a)pyrene|Ethanol|Sodium Selenite|Tetrachlorodibenzodioxin	22.52	29
MSH5	4439	Carcinoma, Hepatocellular	MESH:D006528	marker/mechanism	Acetaminophen|Arsenic|Benzo(a)pyrene|beta Carotene|pirinixic acid|Quercetin|sodium arsenite|Tetrachlorodibenzodioxin|Vitamin E	21.53	20
CLEC4M	10332	Carcinoma, Hepatocellular	MESH:D006528	marker/mechanism	Aflatoxin B1|Benzo(a)pyrene|Estradiol|Fenretinide|Tetrachlorodibenzodioxin|Troglitazone	21.12	21
FLVCR1	28982	Carcinoma, Hepatocellular	MESH:D006528	marker/mechanism	Acetaminophen|Aflatoxin B1|Doxorubicin|Genistein|Pentachlorophenol|sodium arsenite|Tetrachlorodibenzodioxin|Tetradecanoylphorbol Acetate	20.68	35
HOXD9	3235	Carcinoma, Hepatocellular	MESH:D006528	marker/mechanism	Aflatoxin B1|Benzo(a)pyrene|Choline|Estradiol|Fenretinide|Methionine|Tetrachlorodibenzodioxin|Tretinoin	20.68	22
PITPNM3	83394	Carcinoma, Hepatocellular	MESH:D006528	marker/mechanism	Aflatoxin B1|benz(a)anthracene|Benzo(a)pyrene|Cisplatin|Copper|Dichloroacetic Acid|Ethanol|Tetrachlorodibenzodioxin	20.14	39
HOXA13	3209	Carcinoma, Hepatocellular	MESH:D006528	marker/mechanism	Aflatoxin B1|Benzo(a)pyrene|Copper|Drugs, Chinese Herbal|Genistein|Plant Extracts|Tetrachlorodibenzodioxin|Tretinoin	19.88	25
CNTNAP4	85445	Carcinoma, Hepatocellular	MESH:D006528	marker/mechanism	4,4'-diaminodiphenylmethane|Acetaminophen|Aflatoxin B1|Copper|Drugs, Chinese Herbal|Tetrachlorodibenzodioxin|Tretinoin	19.53	26
RNF157	114804	Carcinoma, Hepatocellular	MESH:D006528	marker/mechanism	Acrylamide|Arsenic|Arsenic Trioxide|Copper|Ethanol|Ethinyl Estradiol|pirinixic acid|Tetrachlorodibenzodioxin	19.39	37
TONSL	4796	Carcinoma, Hepatocellular	MESH:D006528	marker/mechanism	1,4-bis(2-(3,5-dichloropyridyloxy))benzene|Aflatoxin B1|Arsenic|Estradiol|Ethanol|Quercetin|Tetrachlorodibenzodioxin|Thioacetamide	19.39	35
MAGEA1	4100	Carcinoma, Hepatocellular	MESH:D006528	marker/mechanism	Acetaminophen|Acrylamide|Azacitidine|Benzo(a)pyrene|Decitabine|Hydroxyurea	19.3	11
SKA3	221150	Carcinoma, Hepatocellular	MESH:D006528	marker/mechanism	Acetaminophen|Aflatoxin B1|Ethanol|Methotrexate|Resveratrol|sodium arsenite|Tetrachlorodibenzodioxin|Tetradecanoylphorbol Acetate|Topotecan	19.3	41
CRHBP	1393	Carcinoma, Hepatocellular	MESH:D006528	marker/mechanism	Copper|Doxorubicin|Estradiol|Ethanol|Fluorouracil|Genistein|Lipopolysaccharides|Tretinoin	18.3	36
TIMD4	91937	Carcinoma, Hepatocellular	MESH:D006528	marker/mechanism	Acetaminophen|Aflatoxin B1|Benzo(a)pyrene|Carbon Tetrachloride|Cisplatin|Methyltestosterone|pirinixic acid	18.29	39
CLTRN	57393	Carcinoma, Hepatocellular	MESH:D006528	marker/mechanism	Acetaminophen|Aflatoxin B1|Benzo(a)pyrene|Cisplatin|Estradiol|pirinixic acid|Quercetin|Tretinoin	18.09	34
GBA3	57733	Carcinoma, Hepatocellular	MESH:D006528	marker/mechanism	Acetaminophen|Aflatoxin B1|Estradiol|sodium arsenite|Sodium Selenite|Tetrachlorodibenzodioxin|Troglitazone	17.75	28
ZNF23	7571	Carcinoma, Hepatocellular	MESH:D006528	marker/mechanism	Bortezomib|Cisplatin|Dexamethasone|Fenretinide|Indomethacin|Quercetin	17.52	17
ZIC5	85416	Carcinoma, Hepatocellular	MESH:D006528	marker/mechanism	Acetaminophen|Aflatoxin B1|Diethylhexyl Phthalate|Estradiol|Plant Extracts|Tetrachlorodibenzodioxin|Tretinoin	17.25	27
PLXDC1	57125	Carcinoma, Hepatocellular	MESH:D006528	marker/mechanism	Aflatoxin B1|Benzo(a)pyrene|Carbon Tetrachloride|Dexamethasone|Ethanol|Genistein|Resveratrol|Tetrachlorodibenzodioxin	17.17	37
DIRAS3	9077	Carcinoma, Hepatocellular	MESH:D006528	marker/mechanism	Acetaminophen|Aflatoxin B1|Arsenic Trioxide|Estradiol|Ethanol|Ethinyl Estradiol|sodium arsenite	17.01	49
XAGE1B	653067	Carcinoma, Hepatocellular	MESH:D006528	marker/mechanism	Aflatoxin B1|Arsenic Trioxide|Decitabine|Fluorouracil	16.4	38
DBH	1621	Carcinoma, Hepatocellular	MESH:D006528	marker/mechanism	Acetaminophen|Arsenic Trioxide|Contraceptives, Oral|Dexamethasone|Diethylhexyl Phthalate|Ethylnitrosourea|Methyltestosterone|Plant Extracts|Tamoxifen|Tretinoin	16.28	50
MAGEA6	4105	Carcinoma, Hepatocellular	MESH:D006528	marker/mechanism	Aflatoxin B1|Cisplatin|Decitabine|Fluorouracil|Methotrexate	16.06	37
GPR158	57512	Carcinoma, Hepatocellular	MESH:D006528	marker/mechanism	2,6-dinitrotoluene|Acetaminophen|Aflatoxin B1|Ethinyl Estradiol|Tetrachlorodibenzodioxin|Tetradecanoylphorbol Acetate	15.88	31
MAGEA3	4102	Carcinoma, Hepatocellular	MESH:D006528	marker/mechanism	Aflatoxin B1|Azacitidine|Cisplatin|Decitabine|Plant Extracts	15.59	30
COX7B2	170712	Carcinoma, Hepatocellular	MESH:D006528	marker/mechanism	Benzo(a)pyrene|Dexamethasone|Doxorubicin|Lipopolysaccharides|Quercetin	15.57	14
IGBP1	3476	Carcinoma, Hepatocellular	MESH:D006528	marker/mechanism	Chlorodiphenyl (54% Chlorine)|Cisplatin|Diethylnitrosamine|Estradiol|Ethinyl Estradiol|sodium arsenite|Tetrachlorodibenzodioxin	15.57	169
SLC22A10	387775	Carcinoma, Hepatocellular	MESH:D006528	marker/mechanism	Aflatoxin B1|Benzo(a)pyrene|Plant Extracts|Tetrachlorodibenzodioxin|Troglitazone	15.13	22
GABRD	2563	Carcinoma, Hepatocellular	MESH:D006528	marker/mechanism	Benzo(a)pyrene|Cisplatin|Dexamethasone|Ethanol|Genistein|Methotrexate|pirinixic acid|Tetrachlorodibenzodioxin	14.71	27
TGM3	7053	Carcinoma, Hepatocellular	MESH:D006528	marker/mechanism	Aflatoxin B1|Arsenic|Copper|Lipopolysaccharides|Resveratrol|Tetrachlorodibenzodioxin	14.4	29
C14ORF180	400258	Carcinoma, Hepatocellular	MESH:D006528	marker/mechanism	Arsenic|Estradiol|Plant Extracts|sodium arsenite	13.8	13
CSMD1	64478	Carcinoma, Hepatocellular	MESH:D006528	marker/mechanism	Acetaminophen|Aflatoxin B1|Benzo(a)pyrene|Diethylnitrosamine|Ethanol|Tetrachlorodibenzodioxin	13.41	168
TEDC2	80178	Carcinoma, Hepatocellular	MESH:D006528	marker/mechanism	Aflatoxin B1|Cisplatin|Copper|Plant Extracts|sodium arsenite	12.91	35
SPRTN	83932	Carcinoma, Hepatocellular	MESH:D006528	marker/mechanism	Acetaminophen|Aflatoxin B1|Quercetin|Tetrachlorodibenzodioxin|Thioacetamide	12	25
FCN2	2220	Carcinoma, Hepatocellular	MESH:D006528	marker/mechanism	Acetaminophen|Aflatoxin B1|Benzo(a)pyrene|Methotrexate	11.91	21
LPA	4018	Carcinoma, Hepatocellular	MESH:D006528	marker/mechanism	Aflatoxin B1|Butylated Hydroxytoluene|Copper|Danazol|Sodium Selenite	11.32	26
MIR615	693200	Carcinoma, Hepatocellular	MESH:D006528	marker/mechanism	Diethylhexyl Phthalate|Estradiol|Resveratrol|Tetrachlorodibenzodioxin	11.28	13
ZIC4	84107	Carcinoma, Hepatocellular	MESH:D006528	marker/mechanism	Acetaminophen|Aflatoxin B1|Decitabine|Dexamethasone|sodium arsenite	11.25	25
FGF3	2248	Carcinoma, Hepatocellular	MESH:D006528	marker/mechanism	Estradiol|Ethinyl Estradiol|Methotrexate|sodium arsenite|Tretinoin	10.76	20
TICRR	90381	Carcinoma, Hepatocellular	MESH:D006528	marker/mechanism	1,4-bis(2-(3,5-dichloropyridyloxy))benzene|Acetaminophen|Aflatoxin B1|Copper|sodium arsenite	9.22	28
LILRB5	10990	Carcinoma, Hepatocellular	MESH:D006528	marker/mechanism	Acetaminophen|Aflatoxin B1|Estradiol	8.95	19
TATDN1	83940	Carcinoma, Hepatocellular	MESH:D006528	marker/mechanism	Aflatoxin B1|Fenretinide|Tetrachlorodibenzodioxin|Tretinoin	8.89	18
CCL14	6358	Carcinoma, Hepatocellular	MESH:D006528	marker/mechanism	Acetaminophen|Arsenic|perfluorooctanoic acid	8.76	10
ADGRG7	84873	Carcinoma, Hepatocellular	MESH:D006528	marker/mechanism	Aflatoxin B1|Benzo(a)pyrene|Estradiol	8.63	16
DIPK2B	79742	Carcinoma, Hepatocellular	MESH:D006528	marker/mechanism	Aflatoxin B1|Benzo(a)pyrene|Doxorubicin	8.63	23
SSX1	6756	Carcinoma, Hepatocellular	MESH:D006528	marker/mechanism	Acetaminophen|Copper|Decitabine	8.47	9
FAM180A	389558	Carcinoma, Hepatocellular	MESH:D006528	marker/mechanism	Aflatoxin B1|Benzo(a)pyrene|Dexamethasone|Genistein	7.73	18
FCN3	8547	Carcinoma, Hepatocellular	MESH:D006528	marker/mechanism	Aflatoxin B1|Ethinyl Estradiol|Plant Extracts	7.48	26
NLRC3	197358	Carcinoma, Hepatocellular	MESH:D006528	marker/mechanism	Arsenic|Benzo(a)pyrene|N-(2-(1,1'-bicyclopropyl)-2-ylphenyl)-3-(difluoromethyl)-1-methyl-1H-pyrazole-4-carboxamide	7.28	7
MIR520B	574473	Carcinoma, Hepatocellular	MESH:D006528	marker/mechanism	Doxorubicin|Estradiol	6.65	11
MAGEC2	51438	Carcinoma, Hepatocellular	MESH:D006528	marker/mechanism	Aflatoxin B1|Tetrachlorodibenzodioxin	6.08	15
FAM65C	428169	Carcinoma, Hepatocellular	MESH:D006528	marker/mechanism	Ethinyl Estradiol|Niclosamide	5.69	10
FAM72B	653820	Carcinoma, Hepatocellular	MESH:D006528	marker/mechanism	Aflatoxin B1|Cisplatin	5.16	24
DCAF4L2	138009	Carcinoma, Hepatocellular	MESH:D006528	marker/mechanism	Sodium Selenite	3.57	2
PPP4R3C	139420	Carcinoma, Hepatocellular	MESH:D006528	marker/mechanism	Estradiol	2.67	3
FAM134B	100859798	Carcinoma, Hepatocellular	MESH:D006528	marker/mechanism	Aflatoxin B1	2.49	14
INS-IGF2	723961	Carcinoma, Hepatocellular	MESH:D006528	marker/mechanism			1
LINC00221	338005	Carcinoma, Hepatocellular	MESH:D006528	marker/mechanism			1
NKILA	105416157	Carcinoma, Hepatocellular	MESH:D006528	marker/mechanism			1
RBMY	19657	Carcinoma, Hepatocellular	MESH:D006528	marker/mechanism			1
SPRTN	83932	RUIJS-AALFS SYNDROME	OMIM:616200	marker/mechanism			1
TP53	7157	Carcinoma, Hepatocellular	MESH:D006528	marker/mechanism|therapeutic	1,2-diphenylhydrazine|1-nitropyrene|2-((((2-chloroethyl)nitrosoamino)carbonyl)amino)propanamide|2,4-dinitrotoluene|2,6-dinitrotoluene|2-Acetylaminofluorene|2-amino-3,8-dimethylimidazo(4,5-f)quinoxaline|2-aminofluorene|3,7,11,15-tetramethyl-2,4,6,10,14-hexadecapentaenoic acid|Acetaminophen|Acetylcysteine|Acrylamide|Aflatoxin B1|Aflatoxins|alpha-hexachlorocyclohexane|alpha-naphthoflavone|Androgens|…	184.37	365
BCL2L1	598	Carcinoma, Hepatocellular	MESH:D006528	marker/mechanism|therapeutic	1,4-bis(2-(3,5-dichloropyridyloxy))benzene|1-nitropyrene|2-(2-hydroxyethylsulfanyl)-3-methyl-1,4-naphthoquinone|2,4-dinitrotoluene|2-Acetylaminofluorene|Acetaminophen|Acetylcysteine|Acrylamide|Aflatoxin B1|Arsenic|Arsenic Trioxide|Ascorbic Acid|Azacitidine|Azathioprine|Benzo(a)pyrene|benzo(b)fluoranthene|Bortezomib|Carbon Tetrachloride|Choline|Cisplatin|Clofibrate|Colchicine|Copper|Curcumin|Cyclo…	140.62	316
BIRC5	332	Carcinoma, Hepatocellular	MESH:D006528	marker/mechanism|therapeutic	1,4-bis(2-(3,5-dichloropyridyloxy))benzene|2-Acetylaminofluorene|4,4'-diaminodiphenylmethane|Acetaminophen|Acetylcysteine|Acrylamide|Aflatoxin B1|Arsenic|Arsenic Trioxide|Ascorbic Acid|Azathioprine|benz(a)anthracene|Benzo(a)pyrene|benzo(b)fluoranthene|Bleomycin|Bortezomib|Budesonide|Carbon Tetrachloride|Cisplatin|Copper|Curcumin|Daunorubicin|Decitabine|deguelin|Dexamethasone|Dichloroacetic Acid|D…	139.62	305
TNFSF10	8743	Carcinoma, Hepatocellular	MESH:D006528	therapeutic	4,4'-diaminodiphenylmethane|Acetaminophen|Acetylcysteine|Aflatoxin B1|Arsenic|Arsenic Trioxide|Ascorbic Acid|Azacitidine|benz(a)anthracene|Benzo(a)pyrene|benzo(b)fluoranthene|beta Carotene|Bortezomib|Carbon Tetrachloride|Chlorodiphenyl (54% Chlorine)|chloroquine diphosphate|Cholesterol|Cisplatin|Clofibrate|Copper|Curcumin|Daunorubicin|Decitabine|Dexamethasone|Dichloroacetic Acid|dicyclanil|Diethy…	150.58	305
PPARG	5468	Carcinoma, Hepatocellular	MESH:D006528	therapeutic	2,4-dinitrotoluene|2,6-dinitrotoluene|Acetaminophen|Acetylcysteine|Acrylamide|Aflatoxin B1|Arsenic|Arsenic Trioxide|Ascorbic Acid|Azacitidine|Benzbromarone|Benzo(a)pyrene|beta Carotene|Bezafibrate|Bleomycin|Butylated Hydroxytoluene|Carbon Tetrachloride|Chlorodiphenyl (54% Chlorine)|Cholesterol|Choline|cinnamic aldehyde|Cisplatin|Clodronic Acid|Clofibrate|Curcumin|Cyclophosphamide|Daunorubicin|DDT…	140.48	312
NFKBIA	4792	Carcinoma, Hepatocellular	MESH:D006528	therapeutic	1-nitropyrene|2-Acetylaminofluorene|(2E,4E,6E,10E)-3,7,11,15-tetramethyl-2,4,6,10,14-hexadecapentaenoic acid|4,4'-diaminodiphenylmethane|Acetaminophen|Acetylcysteine|Acrylamide|Active Hexose Correlated Compound|Aflatoxin B1|antroquinonol|Arsenic|Arsenic Trioxide|Ascorbic Acid|benz(a)anthracene|Benzo(a)pyrene|benzo(b)fluoranthene|Bleomycin|Bortezomib|Butylated Hydroxytoluene|cadmium telluride|Carb…	134.34	317
AR	367	Carcinoma, Hepatocellular	MESH:D006528	therapeutic	1-nitropyrene|4,4'-diaminodiphenylmethane|Acetaminophen|Acetylcysteine|Aflatoxin B1|alpha-hexachlorocyclohexane|alpha-naphthoflavone|Androgens|aroclor 1260|Arsenic Trioxide|Azacitidine|benz(a)anthracene|Benzo(a)pyrene|benzo(b)fluoranthene|benzo(j)fluoranthene|beta-hexachlorocyclohexane|Bortezomib|Budesonide|Butylated Hydroxyanisole|Butylated Hydroxytoluene|Chlorodiphenyl (54% Chlorine)|Choline|Ci…	121.96	207
CXCL8	3576	Carcinoma, Hepatocellular	MESH:D006528	therapeutic	1-nitropyrene|2-aminophenol|3-amino-1,4-dimethyl-5H-pyrido(4,3-b)indole|Acetaminophen|Acetylcysteine|Active Hexose Correlated Compound|Aflatoxin B1|alpha-naphthoflavone|Arsenic|Arsenic Trioxide|Ascorbic Acid|Azathioprine|benz(a)anthracene|Benzo(a)pyrene|benzo(b)fluoranthene|beta Carotene|Bezafibrate|Biological Products|Bleomycin|Bortezomib|Budesonide|Chlorodiphenyl (54% Chlorine)|Cholesterol|Cime…	118.5	312
HTATIP2	10553	Carcinoma, Hepatocellular	MESH:D006528	therapeutic	2,4-dinitrotoluene|2,6-dinitrotoluene|Acetaminophen|Acetylcysteine|Aflatoxin B1|Arsenic Trioxide|benz(a)anthracene|Benzo(a)pyrene|benzo(b)fluoranthene|Carbon Tetrachloride|cinnamic aldehyde|Clofibrate|Dichloroacetic Acid|Diethylhexyl Phthalate|Diethylnitrosamine|epigallocatechin gallate|Ethinyl Estradiol|Fluorouracil|Irinotecan|nimesulide|Pentachlorophenol|Phenobarbital|pirinixic acid|sodium arse…	66.48	224
SERPINA4	5267	Carcinoma, Hepatocellular	MESH:D006528	therapeutic	2,4-dinitrotoluene|2,6-dinitrotoluene|4,4'-diaminodiphenylmethane|Acetaminophen|Aflatoxin B1|Benzbromarone|Benzo(a)pyrene|Clofibrate|Copper|Diethylnitrosamine|Dimethylnitrosamine|Ethionine|perfluorooctanoic acid|pirinixic acid|Quercetin|sodium arsenite|Tetrachlorodibenzodioxin|Thioacetamide|Troglitazone	57.12	183
ACE	1636	Carcinoma, Hepatocellular	MESH:D006528	therapeutic	Ascorbic Acid|Benzo(a)pyrene|Bezafibrate|Bortezomib|Carbon Tetrachloride|Colchicine|Curcumin|Cyclophosphamide|Dexamethasone|Diethylnitrosamine|Doxorubicin|epigallocatechin gallate|Estradiol|Ethanol|Ethinyl Estradiol|Fenretinide|Flavonoids|Genistein|Indomethacin|Methyltestosterone|Nitric Oxide|Pioglitazone|pirinixic acid|Plant Extracts|Quercetin|Resveratrol|sodium arsenite|Streptozocin|Tetrachloro…	50.46	199
IFNA1	3439	Carcinoma, Hepatocellular	MESH:D006528	therapeutic	2-Acetylaminofluorene|Acrylamide|Arsenic|Carbon Tetrachloride|Curcumin|Diethylnitrosamine|Doxorubicin|Fluorouracil|Genistein|Paclitaxel|Pentachlorophenol|pirinixic acid|Plant Extracts|Resveratrol|sodium arsenite|Tamoxifen|Tetrachlorodibenzodioxin	41.5	202
SLC5A5	6528	Carcinoma, Hepatocellular	MESH:D006528	therapeutic	Acrylamide|Aflatoxin B1|alpha-naphthoflavone|Azacitidine|Cisplatin|Clofibrate|Decitabine|Dexamethasone|Doxorubicin|Estradiol|Genistein|Indomethacin|mancozeb|Pentachlorophenol|Phenobarbital|Quercetin|Resveratrol|Tetrachlorodibenzodioxin|Tretinoin|Troglitazone	38.95	95
CD276	80381	Carcinoma, Hepatocellular	MESH:D006528	therapeutic	2-Acetylaminofluorene|4,4'-diaminodiphenylmethane|Aflatoxin B1|Benzo(a)pyrene|Carbon Tetrachloride|Diethylhexyl Phthalate|Diethylnitrosamine|Dimethylnitrosamine|Doxorubicin|Ethanol|Ethinyl Estradiol|Fenretinide|Plant Extracts|Tetrachlorodibenzodioxin|Tetradecanoylphorbol Acetate|Thioacetamide	38.87	191
THEM4	117145	Carcinoma, Hepatocellular	MESH:D006528	therapeutic	Benzo(a)pyrene|Doxorubicin|Estradiol|Ethanol|Irinotecan|perfluorooctanoic acid|pirinixic acid|sodium arsenite|Tetrachlorodibenzodioxin|Tetradecanoylphorbol Acetate|Thioacetamide|Tretinoin	31.08	33
LETM1	3954	Carcinoma, Hepatocellular	MESH:D006528	therapeutic	Acetaminophen|Benzo(a)pyrene|Decitabine|Doxorubicin|Estradiol|Ethanol|Ethinyl Estradiol|sodium arsenite|Tamoxifen|Tetrachlorodibenzodioxin	24.39	51
MIR885	100126334	Carcinoma, Hepatocellular	MESH:D006528	therapeutic	Acetaminophen|Doxorubicin|Estradiol|Ethanol	10.68	22
MIR539	664612	Carcinoma, Hepatocellular	MESH:D006528	therapeutic	Arsenic Trioxide|Resveratrol|Tetrachlorodibenzodioxin	9.05	18
